# Supplementary material
Source: PubMed Central journal article supplement (PMC4842103)
Supplement: NIHMS756248-supplement-supplement_1.pdf [file NIHMS756248-supplement-supplement_1.pdf]

**Table S3:** VEO IBD Gene List: Genes Previously Reported to have a Causal Association with VEO IBD

PMID:25058236

|         |
|---------|
| COL7A1  |
| FERMT1  |
| IKBKG   |
| TTC7A   |
| ADAM17  |
| GUCY2C  |
| CYBB    |
| CYBA    |
| NCF1    |
| NCF2    |
| NCF4    |
| SLC37A4 |
| G6PC3   |
| ITGB2   |
| MVK     |
| PLCG2   |
| MEFV    |
| STXBP2  |
| XIAP    |
| SH2D1A  |
| HPS1    |
| HPS4    |
| HPS6    |
| ICOS    |
| LRBA    |
| IL21    |
| BTK     |
| PIK3R1  |
| CD40LG  |
| AICDA   |
| WAS     |
| DCLRE1C |
| ZAP70   |
| RAG2    |
| IL2RG   |
| LIG4    |
| ADA     |
| CD3g    |
| DKC1    |
| RTEL1   |
| DOCK8   |
| FOXP3   |
| IL2RA   |
| STAT1   |
| IL10RA  |
| IL10RB  |
| IL10    |
| MASP2   |
| SKIV2L  |
| TTC37   |

**Table S4: VEO Top Key Drivers**

| keydrivers | is_signature | hits | downstream | signature_in_subnetwork_size | signature_in_network_size | signature | optimal_layer | fold_change_pvalue_whole | fold_change_pvalue_subne | pvalue_corrected | keydriver |            |          |          |   |
|------------|--------------|------|------------|------------------------------|---------------------------|-----------|---------------|--------------------------|--------------------------|------------------|-----------|------------|----------|----------|---|
| NFAM1      | 1            | 201  | 615        | 664                          | 7528                      | 664       | 7528          | 665                      | 6                        | 3.70537761       | 6.13E-71  | 3.70537761 | 6.13E-71 | 4.62E-67 | 1 |
| GBP5       | 1            | 145  | 395        | 664                          | 7528                      | 664       | 7528          | 665                      | 5                        | 4.1618118        | 5.19E-57  | 4.1618118  | 5.19E-57 | 3.90E-53 | 1 |
| STAT1      | 1            | 31   | 31         | 664                          | 7528                      | 664       | 7528          | 665                      | 2                        | 11.3373494       | 1.07E-33  | 11.3373494 | 1.07E-33 | 8.03E-30 | 1 |
| STX11      | 1            | 70   | 164        | 664                          | 7528                      | 664       | 7528          | 665                      | 4                        | 4.83911255       | 5.39E-32  | 4.83911255 | 5.39E-32 | 4.05E-28 | 1 |
| ARHGDIB    | 1            | 154  | 671        | 664                          | 7528                      | 664       | 7528          | 665                      | 8                        | 2.60201462       | 7.61E-32  | 2.60201462 | 7.61E-32 | 5.73E-28 | 1 |
| VAV1       | 1            | 30   | 34         | 664                          | 7528                      | 664       | 7528          | 665                      | 3                        | 10.0035436       | 4.16E-28  | 10.0035436 | 4.16E-28 | 3.13E-24 | 1 |
| ARHGAP30   | 1            | 125  | 537        | 664                          | 7528                      | 664       | 7528          | 665                      | 5                        | 2.63904781       | 3.77E-26  | 2.63904781 | 3.77E-26 | 2.84E-22 | 1 |
| CASZ1      | 1            | 24   | 25         | 664                          | 7528                      | 664       | 7528          | 665                      | 3                        | 10.8838554       | 7.69E-25  | 10.8838554 | 7.69E-25 | 5.79E-21 | 1 |
| C1ORF228   | 1            | 30   | 39         | 664                          | 7528                      | 664       | 7528          | 665                      | 5                        | 8.721038         | 1.24E-24  | 8.721038   | 1.24E-24 | 9.33E-21 | 1 |
| CYBB       | 1            | 22   | 22         | 664                          | 7528                      | 664       | 7528          | 665                      | 2                        | 11.3373494       | 4.59E-24  | 11.3373494 | 4.59E-24 | 3.45E-20 | 1 |
| SLAMF8     | 1            | 26   | 30         | 664                          | 7528                      | 664       | 7528          | 665                      | 3                        | 9.82570281       | 4.74E-24  | 9.82570281 | 4.74E-24 | 3.57E-20 | 1 |
| DRAM1      | 1            | 53   | 127        | 664                          | 7528                      | 664       | 7528          | 665                      | 5                        | 4.73133479       | 7.86E-24  | 4.73133479 | 7.86E-24 | 5.92E-20 | 1 |
| SNX10      | 1            | 26   | 60         | 664                          | 7528                      | 664       | 7528          | 665                      | 3                        | 4.91285141       | 9.31E-13  | 4.91285141 | 9.31E-13 | 7.01E-09 | 1 |

Table S5:

**IBDGC GWAS ENRICHMENT In TRIM22 locus**

| 0.01 cM:<br>TRIM22 | chr | position | IBD: p-value | IBD: n_markers | CD: p-value | CD: n_markers | UC: p-value | UC: n_markers |
|--------------------|-----|----------|--------------|----------------|-------------|---------------|-------------|---------------|
|                    | 11  | 5734619  | 0.08913      | 163            | 0.006027    | 157           | 0.03147     | 165           |
| 0.1 cM:<br>TRIM22  | chr | position | IBD: p-value | IBD: n_markers | CD: p-value | CD: n_markers | UC: p-value | UC: n_markers |
|                    | 11  | 5734619  | 0.003694     | 332            | 0.006027    | 319           | 0.02398     | 337           |
| 1cM:<br>TRIM22     | chr | position | IBD: p-value | IBD: n_markers | CD: p-value | CD: n_markers | UC: p-value | UC: n_markers |
|                    | 11  | 5734619  | 0.001465     | 5682           | 0.0003264   | 5640          | 0.0002493   | 5731          |

Table S6:

**IBDGC GWAS ENRICHMENT TRIM22 cQTL (NCBI) enrichment**

|               | IBD     | CD     | UC      |
|---------------|---------|--------|---------|
| chr11:5077653 | 0.1452  | 0.4114 | 0.04264 |
| chr11:5060791 | 0.1603  | 0.3978 | 0.04048 |
| chr11:5059064 | 0.1559  | 0.4066 | 0.03872 |
| chr11:5020799 | 0.3528  | 0.3084 | 0.07128 |
| chr11:5020832 | 0.3478  | 0.3139 | 0.07045 |
| chr11:5019217 | 0.3495  | 0.3058 | 0.07004 |
| chr11:5019357 | 0.3503  | 0.3076 | 0.07054 |
| chr11:5020189 | 0.3513  | 0.3084 | 0.07105 |
| chr11:5020509 | 0.3538  | 0.3081 | 0.07163 |
| chr11:5024139 | 0.346   | 0.317  | 0.07096 |
| chr11:5073486 | 0.05608 | 0.5467 | 0.08671 |
| chr11:5016553 | 0.4019  | 0.4234 | 0.1344  |
| chr11:5719667 | 0.7601  | 0.657  | 0.5903  |

Table S7 Genes in eQTL Enriched Pathways

Enrichment analysis report

Enrichment by Pathway Maps

| #  | Maps                                                                            | Total | min(pValue) | Min FDR   | WTCCC_IBD_GWAS_1e-3_union_NHGRI_IBD_UC_CD_blood_genelist |           |         | WTCCC_IBD_GWAS_1e-3_union_NHGRI_IBD_UC_CD_intestine_genelist                    |           |           |         |                                          |
|----|---------------------------------------------------------------------------------|-------|-------------|-----------|----------------------------------------------------------|-----------|---------|---------------------------------------------------------------------------------|-----------|-----------|---------|------------------------------------------|
|    |                                                                                 |       |             |           | p-value                                                  | FDR       | In Data | Network Objects from Active Data                                                | p-value   | FDR       | In Data | Network Objects from Active Data         |
| 1  | <a href="#">Transcription_P53 signaling pathway</a>                             | 39    | 2.441E-04   | 4.171E-02 | 8.248E-02                                                | 3.406E-01 | 2       | MKP-7, VEGF-A                                                                   | 2.441E-04 | 4.171E-02 | 3       | VEGF-A, c-Fos, MKP-7                     |
| 2  | <a href="#">Signal transduction_PKA signaling</a>                               | 51    | 3.812E-04   | 1.403E-01 | 3.812E-04                                                | 1.403E-01 | 5       | AKAP12, Adenylate cyclase, PP2A regulatory, DARPP-32, G-protein alpha-12 family | 1.502E-01 | 1.783E-01 | 1       | Adenylate cyclase                        |
| 3  | <a href="#">Immune response_C3a signaling</a>                                   | 48    | 4.532E-04   | 4.171E-02 | 2.760E-03                                                | 1.410E-01 | 4       | RhoA, Adenylate cyclase, CD40(TNFRSF5), VEGF-A                                  | 4.532E-04 | 4.171E-02 | 3       | Adenylate cyclase, VEGF-A, CD40(TNFRSF5) |
| 4  | <a href="#">Immune response_Antiviral actions of Interferons</a>                | 52    | 5.741E-04   | 4.171E-02 | 2.573E-02                                                | 2.192E-01 | 3       | IRF1, MHC class I, HLA-A                                                        | 5.741E-04 | 4.171E-02 | 3       | CITA, HLA-A, MHC class I                 |
| 5  | <a href="#">Immune response_HSP60 and HSP70_TLR signaling pathway</a>           | 54    | 6.416E-04   | 4.171E-02 | 4.240E-03                                                | 1.410E-01 | 4       | TLR4, MHC class I, CD40(TNFRSF5), TPL2(MAP3K8)                                  | 6.416E-04 | 4.171E-02 | 3       | HSP70, CD40(TNFRSF5), MHC class I        |
| 6  | <a href="#">Regulation of CTR activity (normal and CF)</a>                      | 62    | 9.436E-04   | 1.403E-01 | 9.436E-04                                                | 1.403E-01 | 5       | Syk, Annexin V, Adenylate cyclase, COMMD1 (MURR1), PP2A regulatory              | 1.796E-01 | 1.938E-01 | 1       | Adenylate cyclase                        |
| 7  | <a href="#">Neuroprotective action of lithium</a>                               | 63    | 1.008E-03   | 5.240E-02 | 1.808E-01                                                | 4.428E-01 | 2       | VEGF-A, PPI-cat                                                                 | 1.008E-03 | 5.240E-02 | 3       | VEGF-A, HSP70, WNT                       |
| 8  | <a href="#">Immune response_PGE2 signaling in immune response</a>               | 45    | 2.173E-03   | 1.410E-01 | 2.173E-03                                                | 1.410E-01 | 4       | Adenylate cyclase, IL-2, CREM (activators), CREM (repressors)                   | 1.337E-01 | 1.783E-01 | 1       | Adenylate cyclase                        |
| 9  | <a href="#">Proteolysis_Putative ubiquitin pathway</a>                          | 23    | 2.366E-03   | 7.636E-02 | 2.475E-01                                                | 5.017E-01 | 1       | UBCH7                                                                           | 2.366E-03 | 7.636E-02 | 2       | HSP70, UBCH7                             |
| 10 | <a href="#">Proteolysis_Role of Parkin in the Ubiquitin-Proteasomal Pathway</a> | 24    | 2.576E-03   | 7.636E-02 | 2.567E-01                                                | 5.112E-01 | 1       | UBCH7                                                                           | 2.576E-03 | 7.636E-02 | 2       | HSP70, UBCH7                             |

**Table S8 Crohn's GWAS Enriched Blood eQTL Overlap with the VEO Network**

| snp        | snp_chr | snp_pos_hg19 | gene       | ensembl_id | gene_symbol | cis_trans_ind | fd | pvalue | tissue         | IBD_META_P |
|------------|---------|--------------|------------|------------|-------------|---------------|----|--------|----------------|------------|
| rs1872691  | 16      | 50350210     | ENSG000001 | ADCY7      | cis         |               |    | 0      | 0 Blood        | 5.59E-18   |
| rs3813755  | 16      | 50348577     | ENSG000001 | ADCY7      | cis         |               |    | 0      | 0 Blood        | 7.89E-18   |
| rs3826173  | 16      | 50345012     | ENSG000001 | ADCY7      | cis         |               |    | 0      | 0 Blood        | 1.88E-17   |
| rs4785210  | 16      | 50340154     | ENSG000001 | ADCY7      | cis         |               |    | 0      | 0 Blood        | 3.44E-11   |
| rs4785403  | 16      | 50340217     | ENSG000001 | ADCY7      | cis         |               |    | 0      | 0 Blood        | 3.42E-11   |
| rs4785412  | 16      | 50385468     | ENSG000001 | ADCY7      | cis         |               |    | 0      | 0 Blood        | 1.12E-17   |
| rs7184802  | 16      | 50355996     | ENSG000001 | ADCY7      | cis         |               |    | 0      | 0 Blood        | 7.30E-18   |
| rs8047812  | 16      | 50389485     | ENSG000001 | ADCY7      | cis         |               |    | 0      | 0 Blood        | 1.04E-19   |
| rs4643314  | 16      | 50375955     | ENSG000001 | ADCY7      | cis         |               |    | 0      | 1.00E-13 Blood | 1.11E-20   |
| rs12325247 | 16      | 50363559     | ENSG000001 | ADCY7      | cis         |               |    | 0      | 1.03E-13 Blood | 5.90E-21   |
| rs9525625  | 13      | 43018030     | ENSG000001 | AKAP11     | cis         |               |    | 0      | 1.06E-06 Blood | 1.00E-10   |
| rs3116494  | 2       | 204592021    | ENSG000001 | CD28       | cis         |               |    | 0      | 6.11E-14 Blood | 1.00E-10   |
| rs1569723  | 20      | 44742064     | LRG_40     | CD40       | cis         |               |    | 0      | 0 Blood        | 6.55E-11   |
| rs2425752  | 20      | 44702120     | LRG_40     | CD40       | cis         |               |    | 0      | 0 Blood        | 3.09E-08   |
| rs4810485  | 20      | 44747947     | LRG_40     | CD40       | cis         |               |    | 0      | 0 Blood        | 3.89E-10   |
| rs6131010  | 20      | 44724305     | LRG_40     | CD40       | cis         |               |    | 0      | 0 Blood        | 3.89E-08   |
| rs12624433 | 20      | 44680853     | LRG_40     | CD40       | cis         |               |    | 0      | 2.00E-20 Blood | 3.69E-09   |
| rs1569723  | 20      | 44742064     | LRG_40     | CD40       | cis         |               |    | 0.03   | 6.13E-05 Blood | 6.55E-11   |
| rs11230556 | 11      | 60765984     | ENSG000001 | CD6        | Cis         |               |    | 0.1    | 1.46E-06 Blood | 6.43E-07   |
| rs11230555 | 11      | 60763134     | ENSG000001 | CD6        | Cis         |               |    | 0.1    | 1.86E-06 Blood | 8.19E-07   |
| rs12421176 | 11      | 60805385     | ENSG000001 | CD6        | Cis         |               |    | 0.1    | 3.39E-06 Blood | 4.70E-07   |
| rs12293191 | 11      | 60806747     | ENSG000001 | CD6        | Cis         |               |    | 0.1    | 3.51E-06 Blood | 3.95E-07   |
| rs11230556 | 11      | 60765984     | ENSG000001 | CD6        | Cis         |               |    | 0.1    | 9.63E-06 Blood | 6.43E-07   |
| rs11085735 | 19      | 10602180     | ENSG000001 | CDKN2D     | cis         |               |    | 0.01   | 1.48E-05 Blood | 1.36E-10   |
| rs913678   | 20      | 48955424     | ENSG000001 | CEBPB      | cis         |               |    | 0      | 8.55E-18 Blood | 4.59E-08   |
| rs1199096  | 10      | 59950234     | ENSG000001 | CISD1      | Cis         | NA            |    |        | 0 Whole blood  | 5.78E-07   |
| rs1199096  | 10      | 59950234     | ENSG000001 | CISD1      | Cis         | NA            |    |        | 0 Whole blood  | 5.78E-07   |
| rs1199096  | 10      | 59950234     | ENSG000001 | CISD1      | Cis         | NA            |    |        | 0 Whole blood  | 5.78E-07   |
| rs1199096  | 10      | 59950234     | ENSG000001 | CISD1      | cis         |               |    | 0      | 0 Blood        | 5.78E-07   |
| rs1199103  | 10      | 59947231     | ENSG000001 | CISD1      | cis         |               |    | 0      | 0 Blood        | 1.88E-07   |

|           |    |          |                           |     |    |     |                |          |
|-----------|----|----------|---------------------------|-----|----|-----|----------------|----------|
| rs1416764 | 10 | 60040351 | ENSG000001CISD1           | cis |    | 0   | 0 Blood        | 2.56E-07 |
| rs1698402 | 10 | 59936444 | ENSG000001CISD1           | cis |    | 0   | 0 Blood        | 2.57E-07 |
| rs1769044 | 10 | 59958956 | ENSG000001CISD1           | cis |    | 0   | 0 Blood        | 4.54E-07 |
| rs1867571 | 10 | 60038850 | ENSG000001CISD1           | cis |    | 0   | 0 Blood        | 3.00E-07 |
| rs1867573 | 10 | 60042972 | ENSG000001CISD1           | cis |    | 0   | 0 Blood        | 3.55E-07 |
| rs2153281 | 10 | 59972453 | ENSG000001CISD1           | cis |    | 0   | 0 Blood        | 2.71E-07 |
| rs2251039 | 10 | 60028894 | ENSG000001CISD1           | cis |    | 0   | 0 Blood        | 2.46E-07 |
| rs2253192 | 10 | 59999323 | ENSG000001CISD1           | cis |    | 0   | 0 Blood        | 1.93E-07 |
| rs2254775 | 10 | 60036815 | ENSG000001CISD1           | cis |    | 0   | 0 Blood        | 2.20E-07 |
| rs2486491 | 10 | 59970391 | ENSG000001CISD1           | cis |    | 0   | 0 Blood        | 2.97E-07 |
| rs2590307 | 10 | 59977161 | ENSG000001CISD1           | cis |    | 0   | 0 Blood        | 5.12E-07 |
| rs2590313 | 10 | 59986383 | ENSG000001CISD1           | cis |    | 0   | 0 Blood        | 3.31E-07 |
| rs2590339 | 10 | 60012231 | ENSG000001CISD1           | cis |    | 0   | 0 Blood        | 2.78E-07 |
| rs2790155 | 10 | 59974744 | ENSG000001CISD1           | cis |    | 0   | 0 Blood        | 2.92E-07 |
| rs2790170 | 10 | 60028507 | ENSG000001CISD1           | cis |    | 0   | 0 Blood        | 1.87E-07 |
| rs2790179 | 10 | 60035372 | ENSG000001CISD1           | Cis | NA |     | 0 Whole blood  | 2.38E-07 |
| rs2790179 | 10 | 60035372 | ENSG000001CISD1           | Cis | NA |     | 0 Whole blood  | 2.38E-07 |
| rs2790179 | 10 | 60035372 | ENSG000001CISD1           | Cis | NA |     | 0 Whole blood  | 2.38E-07 |
| rs2790179 | 10 | 60035372 | ENSG000001CISD1           | cis |    | 0   | 0 Blood        | 2.38E-07 |
| rs2790182 | 10 | 60039877 | ENSG000001CISD1           | cis |    | 0   | 0 Blood        | 2.25E-07 |
| rs2790189 | 10 | 60042576 | ENSG000001CISD1           | cis |    | 0   | 0 Blood        | 1.09E-07 |
| rs2790216 | 10 | 59997926 | ENSG000001CISD1           | cis |    | 0   | 0 Blood        | 1.60E-07 |
| rs2790236 | 10 | 59985102 | ENSG000001CISD1           | cis |    | 0   | 0 Blood        | 2.79E-07 |
| rs2790241 | 10 | 60015313 | ENSG000001CISD1           | cis |    | 0   | 0 Blood        | 2.28E-07 |
| rs2790242 | 10 | 59980652 | ENSG000001CISD1           | cis |    | 0   | 0 Blood        | 5.78E-07 |
| rs1199096 | 10 | 59950234 | ENSG000001ENSG000001CISD1 | Cis |    | 0.1 | 2.81E-18 Blood | 5.78E-07 |
| rs1199103 | 10 | 59947231 | ENSG000001ENSG000001CISD1 | Cis |    | 0.1 | 2.91E-18 Blood | 1.88E-07 |
| rs2486491 | 10 | 59970391 | ENSG000001ENSG000001CISD1 | Cis |    | 0.1 | 3.03E-18 Blood | 2.97E-07 |
| rs2153281 | 10 | 59972453 | ENSG000001ENSG000001CISD1 | Cis |    | 0.1 | 3.05E-18 Blood | 2.71E-07 |
| rs1769044 | 10 | 59958956 | ENSG000001ENSG000001CISD1 | Cis |    | 0.1 | 3.07E-18 Blood | 4.54E-07 |
| rs2790242 | 10 | 59980652 | ENSG000001ENSG000001CISD1 | Cis |    | 0.1 | 3.09E-18 Blood | 5.78E-07 |
| rs2790155 | 10 | 59974744 | ENSG000001ENSG000001CISD1 | Cis |    | 0.1 | 3.11E-18 Blood | 2.92E-07 |

|            |    |           |                      |        |     |      |          |       |          |
|------------|----|-----------|----------------------|--------|-----|------|----------|-------|----------|
| rs2590313  | 10 | 59986383  | ENSG000001ENSG000001 | CISD1  | Cis | 0.1  | 3.15E-18 | Blood | 3.31E-07 |
| rs2790236  | 10 | 59985102  | ENSG000001ENSG000001 | CISD1  | Cis | 0.1  | 3.16E-18 | Blood | 2.79E-07 |
| rs2790216  | 10 | 59997926  | ENSG000001ENSG000001 | CISD1  | Cis | 0.1  | 4.26E-18 | Blood | 1.60E-07 |
| rs1698402  | 10 | 59936444  | ENSG000001ENSG000001 | CISD1  | Cis | 0.1  | 4.34E-18 | Blood | 2.57E-07 |
| rs2590307  | 10 | 59977161  | ENSG000001ENSG000001 | CISD1  | Cis | 0.1  | 4.78E-18 | Blood | 5.12E-07 |
| rs2253192  | 10 | 59999323  | ENSG000001ENSG000001 | CISD1  | Cis | 0.1  | 5.19E-18 | Blood | 1.93E-07 |
| rs2590339  | 10 | 60012231  | ENSG000001ENSG000001 | CISD1  | Cis | 0.1  | 1.28E-17 | Blood | 2.78E-07 |
| rs2790189  | 10 | 60042576  | ENSG000001ENSG000001 | CISD1  | Cis | 0.1  | 1.87E-17 | Blood | 1.09E-07 |
| rs2790170  | 10 | 60028507  | ENSG000001ENSG000001 | CISD1  | Cis | 0.1  | 2.02E-17 | Blood | 1.87E-07 |
| rs2251039  | 10 | 60028894  | ENSG000001ENSG000001 | CISD1  | Cis | 0.1  | 2.19E-17 | Blood | 2.46E-07 |
| rs1867571  | 10 | 60038850  | ENSG000001ENSG000001 | CISD1  | Cis | 0.1  | 2.41E-17 | Blood | 3.00E-07 |
| rs2790179  | 10 | 60035372  | ENSG000001ENSG000001 | CISD1  | Cis | 0.1  | 2.60E-17 | Blood | 2.38E-07 |
| rs2254775  | 10 | 60036815  | ENSG000001ENSG000001 | CISD1  | Cis | 0.1  | 2.63E-17 | Blood | 2.20E-07 |
| rs1416764  | 10 | 60040351  | ENSG000001ENSG000001 | CISD1  | Cis | 0.1  | 2.88E-17 | Blood | 2.56E-07 |
| rs1867573  | 10 | 60042972  | ENSG000001ENSG000001 | CISD1  | Cis | 0.1  | 3.01E-17 | Blood | 3.55E-07 |
| rs1416763  | 10 | 60029163  | ENSG000001ENSG000001 | CISD1  | Cis | 0.1  | 4.00E-17 | Blood | 1.80E-07 |
| rs2790182  | 10 | 60039877  | ENSG000001ENSG000001 | CISD1  | Cis | 0.1  | 4.05E-17 | Blood | 2.25E-07 |
| rs2790241  | 10 | 60015313  | ENSG000001ENSG000001 | CISD1  | Cis | 0.1  | 5.42E-17 | Blood | 2.28E-07 |
| rs740495   | 19 | 1124835   | ENSG000001(CNN2      |        | cis | 0    | 1.06E-06 | Blood | 1.20E-14 |
| rs2472649  | 4  | 74857708  | ENSG000001CXCL5      |        | cis | 0    | 0        | Blood | 4.15E-07 |
| rs7512140  | 1  | 161463601 | ENSG000001(FCGR2B    |        | cis | 0    | 0        | Blood | 5.90E-07 |
| rs7103915  | 11 | 63944370  | LRG_180              | FERMT3 | cis | 0.01 | 1.39E-05 | Blood | 9.57E-09 |
| rs11231713 | 11 | 63931849  | LRG_180              | FERMT3 | cis | 0.02 | 3.75E-05 | Blood | 5.27E-09 |
| rs2096706  | 11 | 63924446  | LRG_180              | FERMT3 | cis | 0.02 | 4.46E-05 | Blood | 1.32E-08 |
| rs11601686 | 11 | 64189110  | LRG_180              | FERMT3 | cis | 0.02 | 4.83E-05 | Blood | 1.19E-08 |
| rs947939   | 11 | 63885287  | LRG_180              | FERMT3 | cis | 0.03 | 6.18E-05 | Blood | 2.54E-08 |
| rs1205843  | 20 | 30742996  | ENSG000001HCK        |        | cis | 0    | 1.06E-05 | Blood | 9.38E-07 |
| rs7911264  | 10 | 94436851  | ENSG000001HHEX       |        | cis | 0    | 1.50E-19 | Blood | 2.98E-08 |
| rs2497306  | 10 | 94485211  | ENSG000001HHEX       |        | cis | 0    | 2.93E-15 | Blood | 7.38E-08 |
| rs2497304  | 10 | 94492716  | ENSG000001HHEX       |        | cis | 0    | 6.22E-15 | Blood | 6.26E-08 |
| rs10882091 | 10 | 94374377  | ENSG000001HHEX       |        | cis | 0    | 2.76E-14 | Blood | 1.01E-07 |
| rs6583830  | 10 | 94398118  | ENSG000001HHEX       |        | cis | 0    | 4.64E-14 | Blood | 8.86E-08 |

|            |    |          |                 |     |    |      |                |          |
|------------|----|----------|-----------------|-----|----|------|----------------|----------|
| rs7914814  | 10 | 94382950 | ENSG000001HHEX  | cis |    | 0    | 4.64E-14 Blood | 8.66E-08 |
| rs947591   | 10 | 94495753 | ENSG000001HHEX  | cis |    | 0    | 1.03E-12 Blood | 1.06E-07 |
| rs12778642 | 10 | 94464307 | ENSG000001HHEX  | cis |    | 0    | 2.32E-11 Blood | 3.67E-08 |
| rs5015480  | 10 | 94465559 | ENSG000001HHEX  | cis |    | 0    | 3.31E-08 Blood | 3.29E-07 |
| rs7924271  | 10 | 94542446 | ENSG000001HHEX  | cis |    | 0.02 | 5.96E-05 Blood | 7.07E-07 |
| rs1007654  | 17 | 38111354 | ENSG000001IKZF3 | cis |    | 0    | 0 Blood        | 2.80E-12 |
| rs11869286 | 17 | 37813856 | ENSG000001IKZF3 | cis |    | 0    | 0 Blood        | 1.80E-09 |
| rs1476278  | 17 | 37836243 | ENSG000001IKZF3 | cis |    | 0    | 0 Blood        | 2.60E-12 |
| rs1877031  | 17 | 37814080 | ENSG000001IKZF3 | cis |    | 0    | 0 Blood        | 1.84E-09 |
| rs2271308  | 17 | 37817482 | ENSG000001IKZF3 | cis |    | 0    | 0 Blood        | 1.33E-07 |
| rs2517955  | 17 | 37843681 | ENSG000001IKZF3 | cis |    | 0    | 0 Blood        | 3.66E-13 |
| rs8065126  | 17 | 38099035 | ENSG000001IKZF3 | cis |    | 0    | 0 Blood        | 3.36E-13 |
| s903502    | 17 | 37829604 | ENSG000001IKZF3 | cis |    | 0    | 0 Blood        | 5.21E-15 |
| rs9303274  | 17 | 37836353 | ENSG000001IKZF3 | cis |    | 0    | 0 Blood        | 2.24E-12 |
| rs9303277  | 17 | 37976469 | ENSG000001IKZF3 | Cis | NA |      | 0 Whole blood  | 7.90E-28 |
| rs9303277  | 17 | 37976469 | ENSG000001IKZF3 | Cis | NA |      | 0 Whole blood  | 7.90E-28 |
| rs9303277  | 17 | 37976469 | ENSG000001IKZF3 | Cis | NA |      | 0 Whole blood  | 7.90E-28 |
| rs3859192  | 17 | 38128648 | ENSG000001IKZF3 | cis |    | 0    | 4.41E-16 Blood | 2.38E-14 |
| rs12453334 | 17 | 38153473 | ENSG000001IKZF3 | cis |    | 0    | 2.28E-13 Blood | 5.25E-09 |
| rs2227319  | 17 | 38170845 | ENSG000001IKZF3 | cis |    | 0    | 3.49E-13 Blood | 5.01E-09 |
| rs907091   | 17 | 37921742 | ENSG000001IKZF3 | cis |    | 0    | 3.39E-12 Blood | 4.87E-29 |
| rs8077456  | 17 | 38128765 | ENSG000001IKZF3 | cis |    | 0    | 1.32E-11 Blood | 5.30E-07 |
| rs10445308 | 17 | 37938047 | ENSG000001IKZF3 | cis |    | 0    | 2.53E-11 Blood | 6.67E-36 |
| rs907092   | 17 | 37922259 | ENSG000001IKZF3 | cis |    | 0    | 6.65E-11 Blood | 1.77E-37 |
| rs8075668  | 17 | 38137623 | ENSG000001IKZF3 | cis |    | 0    | 2.98E-08 Blood | 6.32E-11 |
| rs6503525  | 17 | 38095174 | ENSG000001IKZF3 | cis |    | 0    | 4.14E-06 Blood | 2.66E-15 |
| rs8079416  | 17 | 38092713 | ENSG000001IKZF3 | cis |    | 0    | 5.04E-06 Blood | 2.71E-15 |
| rs7212938  | 17 | 38122680 | ENSG000001IKZF3 | cis |    | 0    | 6.90E-06 Blood | 1.07E-13 |
| rs1008723  | 17 | 38066267 | ENSG000001IKZF3 | cis |    | 0.01 | 1.89E-05 Blood | 1.18E-25 |
| rs869402   | 17 | 38068043 | ENSG000001IKZF3 | cis |    | 0.01 | 1.97E-05 Blood | 8.09E-24 |
| rs2305479  | 17 | 38062217 | ENSG000001IKZF3 | cis |    | 0.01 | 1.99E-05 Blood | 1.34E-29 |
| rs3816470  | 17 | 37985801 | ENSG000001IKZF3 | cis |    | 0.01 | 2.32E-05 Blood | 4.69E-27 |



|            |    |           |                 |     |      |                |          |
|------------|----|-----------|-----------------|-----|------|----------------|----------|
| rs7224129  | 17 | 38075426  | ENSG000001IKZF3 | cis | 0.02 | 3.60E-05 Blood | 4.74E-24 |
| rs7219923  | 17 | 38074518  | ENSG000001IKZF3 | cis | 0.02 | 3.72E-05 Blood | 6.98E-24 |
| rs9303281  | 17 | 38074046  | ENSG000001IKZF3 | cis | 0.02 | 3.78E-05 Blood | 5.34E-24 |
| rs9901146  | 17 | 38043343  | ENSG000001IKZF3 | cis | 0.02 | 3.82E-05 Blood | 1.74E-29 |
| rs907091   | 17 | 37921742  | ENSG000001IKZF3 | cis | 0.02 | 3.92E-05 Blood | 4.87E-29 |
| rs9303277  | 17 | 37976469  | ENSG000001IKZF3 | cis | 0.02 | 5.35E-05 Blood | 7.90E-28 |
| rs8070454  | 17 | 38160754  | ENSG000001IKZF3 | cis | 0.03 | 6.08E-05 Blood | 4.05E-10 |
| rs8078723  | 17 | 38166879  | ENSG000001IKZF3 | cis | 0.03 | 6.88E-05 Blood | 3.62E-10 |
| rs2070729  | 5  | 131819921 | ENSG000001IRF1  | cis | 0    | 4.51E-10 Blood | 7.57E-23 |
| rs10077785 | 5  | 131801158 | ENSG000001IRF1  | cis | 0    | 4.58E-09 Blood | 6.64E-19 |
| rs10039559 | 5  | 131804507 | ENSG000001IRF1  | cis | 0    | 4.66E-09 Blood | 6.95E-18 |
| rs2248116  | 5  | 131804347 | ENSG000001IRF1  | cis | 0    | 5.18E-09 Blood | 1.77E-37 |
| rs2522057  | 5  | 131801947 | ENSG000001IRF1  | cis | 0    | 7.83E-09 Blood | 4.61E-37 |
| rs2188962  | 5  | 131770805 | ENSG000001IRF1  | cis | 0    | 8.50E-09 Blood | 3.74E-37 |
| rs11745587 | 5  | 131796922 | ENSG000001IRF1  | cis | 0    | 9.96E-09 Blood | 4.27E-29 |
| rs12521868 | 5  | 131784393 | ENSG000001IRF1  | cis | 0    | 1.23E-08 Blood | 3.05E-37 |
| rs3857440  | 5  | 131794069 | ENSG000001IRF1  | cis | 0    | 1.66E-08 Blood | 1.99E-18 |
| rs2548993  | 5  | 131808869 | ENSG000001IRF1  | cis | 0    | 2.10E-08 Blood | 3.84E-19 |
| rs11748193 | 5  | 131725329 | ENSG000001IRF1  | cis | 0    | 3.24E-08 Blood | 7.93E-36 |
| rs11746555 | 5  | 131727033 | ENSG000001IRF1  | cis | 0    | 3.41E-08 Blood | 5.24E-36 |
| rs4540166  | 5  | 131779857 | ENSG000001IRF1  | cis | 0    | 3.50E-08 Blood | 2.74E-19 |
| rs11744116 | 5  | 131779760 | ENSG000001IRF1  | cis | 0    | 3.51E-08 Blood | 1.31E-19 |
| rs11739135 | 5  | 131733397 | ENSG000001IRF1  | cis | 0    | 4.07E-08 Blood | 4.50E-36 |
| rs4235801  | 5  | 131782444 | ENSG000001IRF1  | cis | 0    | 6.04E-08 Blood | 4.30E-19 |
| rs17622208 | 5  | 131717050 | ENSG000001IRF1  | cis | 0    | 3.43E-07 Blood | 1.69E-25 |
| rs11950562 | 5  | 131652529 | ENSG000001IRF1  | cis | 0    | 3.58E-07 Blood | 7.94E-25 |
| rs10058074 | 5  | 131686146 | ENSG000001IRF1  | cis | 0    | 5.12E-07 Blood | 1.72E-25 |
| rs4705938  | 5  | 131694077 | ENSG000001IRF1  | cis | 0    | 5.41E-07 Blood | 1.82E-25 |
| rs10071051 | 5  | 131752620 | ENSG000001IRF1  | cis | 0    | 7.87E-07 Blood | 1.31E-15 |
| rs17622656 | 5  | 131820997 | ENSG000001IRF1  | cis | 0    | 8.81E-07 Blood | 3.10E-37 |
| rs2285673  | 5  | 131755969 | ENSG000001IRF1  | cis | 0    | 1.06E-06 Blood | 5.66E-16 |
| rs17715481 | 5  | 131815384 | ENSG000001IRF1  | cis | 0    | 5.80E-06 Blood | 5.41E-09 |

|            |   |           |                |     |      |                |          |
|------------|---|-----------|----------------|-----|------|----------------|----------|
| rs7705189  | 5 | 131623358 | ENSG000001IRF1 | cis | 0.01 | 1.15E-05 Blood | 7.89E-17 |
| rs2089855  | 5 | 131573529 | ENSG000001IRF1 | cis | 0.03 | 8.77E-05 Blood | 2.17E-20 |
| rs7701414  | 5 | 131585958 | ENSG000001IRF1 | cis | 0.04 | 9.12E-05 Blood | 7.08E-20 |
| rs4594848  | 5 | 131586598 | ENSG000001IRF1 | cis | 0.04 | 9.61E-05 Blood | 6.65E-20 |
| rs10758677 | 9 | 5188078   | ENSG00000(JAK2 | cis | 0    | 0 Blood        | 2.10E-14 |
| rs10815144 | 9 | 5010192   | ENSG00000(JAK2 | cis | 0    | 0 Blood        | 9.17E-17 |
| rs1328917  | 9 | 5049065   | ENSG00000(JAK2 | cis | 0    | 0 Blood        | 6.31E-18 |
| rs2149556  | 9 | 5059440   | ENSG00000(JAK2 | cis | 0    | 0 Blood        | 2.42E-15 |
| rs2230724  | 9 | 5081780   | ENSG00000(JAK2 | cis | 0    | 0 Blood        | 5.57E-17 |
| rs7023146  | 9 | 5040163   | ENSG00000(JAK2 | cis | 0    | 0 Blood        | 4.64E-18 |
| rs7847294  | 9 | 5097281   | ENSG00000(JAK2 | cis | 0    | 0 Blood        | 1.18E-14 |
| rs7861755  | 9 | 5273180   | ENSG00000(JAK2 | cis | 0    | 0 Blood        | 1.25E-09 |
| rs7034753  | 9 | 5021514   | ENSG00000(JAK2 | cis | 0    | 4.00E-20 Blood | 4.86E-14 |
| rs7850484  | 9 | 5147817   | ENSG00000(JAK2 | cis | 0    | 6.90E-19 Blood | 1.27E-26 |
| rs11793659 | 9 | 5109707   | ENSG00000(JAK2 | cis | 0    | 3.90E-18 Blood | 3.34E-27 |
| rs17425637 | 9 | 5110000   | ENSG00000(JAK2 | cis | 0    | 3.90E-18 Blood | 4.86E-28 |
| rs10815157 | 9 | 5108771   | ENSG00000(JAK2 | cis | 0    | 4.19E-18 Blood | 8.07E-27 |
| rs3824433  | 9 | 5113577   | ENSG00000(JAK2 | cis | 0    | 5.15E-18 Blood | 4.62E-27 |
| rs3780374  | 9 | 5099677   | ENSG00000(JAK2 | cis | 0    | 5.39E-18 Blood | 1.03E-27 |
| rs17425819 | 9 | 5114773   | ENSG00000(JAK2 | cis | 0    | 5.48E-18 Blood | 5.42E-28 |
| rs3780373  | 9 | 5098223   | ENSG00000(JAK2 | cis | 0    | 7.61E-18 Blood | 3.00E-26 |
| rs7047795  | 9 | 5181467   | ENSG00000(JAK2 | cis | 0    | 9.65E-18 Blood | 9.30E-26 |
| rs10119004 | 9 | 5071049   | ENSG00000(JAK2 | cis | 0    | 9.84E-18 Blood | 9.93E-17 |
| rs3780381  | 9 | 5114523   | ENSG00000(JAK2 | cis | 0    | 1.52E-17 Blood | 8.73E-28 |
| rs7038687  | 9 | 5134065   | ENSG00000(JAK2 | cis | 0    | 2.48E-17 Blood | 1.07E-26 |
| rs10121316 | 9 | 5147539   | ENSG00000(JAK2 | cis | 0    | 2.54E-17 Blood | 1.32E-26 |
| rs10758674 | 9 | 5163645   | ENSG00000(JAK2 | cis | 0    | 2.57E-17 Blood | 3.16E-26 |
| rs7029084  | 9 | 5174638   | ENSG00000(JAK2 | cis | 0    | 2.58E-17 Blood | 5.71E-26 |
| rs7871515  | 9 | 5175288   | ENSG00000(JAK2 | cis | 0    | 2.76E-17 Blood | 7.51E-26 |
| rs7040922  | 9 | 5174829   | ENSG00000(JAK2 | cis | 0    | 3.00E-17 Blood | 1.47E-25 |
| rs3780382  | 9 | 5232299   | ENSG00000(JAK2 | cis | 0    | 3.21E-17 Blood | 2.38E-22 |
| rs16922779 | 9 | 5200127   | ENSG00000(JAK2 | cis | 0    | 3.25E-17 Blood | 6.92E-23 |

|            |   |         |                 |     |   |                |          |
|------------|---|---------|-----------------|-----|---|----------------|----------|
| rs10491650 | 9 | 5203054 | ENSG000000(JAK2 | cis | 0 | 3.47E-17 Blood | 3.56E-22 |
| rs12343038 | 9 | 5178579 | ENSG000000(JAK2 | cis | 0 | 3.61E-17 Blood | 7.37E-26 |
| rs10491651 | 9 | 5200060 | ENSG000000(JAK2 | cis | 0 | 3.64E-17 Blood | 2.27E-23 |
| rs16922786 | 9 | 5200714 | ENSG000000(JAK2 | cis | 0 | 3.64E-17 Blood | 3.58E-23 |
| rs6476948  | 9 | 5204404 | ENSG000000(JAK2 | cis | 0 | 3.84E-17 Blood | 5.25E-23 |
| rs10974993 | 9 | 5182159 | ENSG000000(JAK2 | cis | 0 | 4.00E-17 Blood | 3.77E-26 |
| rs10122037 | 9 | 5192874 | ENSG000000(JAK2 | cis | 0 | 4.69E-17 Blood | 2.48E-24 |
| rs1322222  | 9 | 5190444 | ENSG000000(JAK2 | cis | 0 | 4.74E-17 Blood | 1.56E-23 |
| rs10118930 | 9 | 5148278 | ENSG000000(JAK2 | cis | 0 | 4.80E-17 Blood | 4.57E-27 |
| rs7850294  | 9 | 5191128 | ENSG000000(JAK2 | cis | 0 | 4.97E-17 Blood | 1.51E-22 |
| rs12115301 | 9 | 5180548 | ENSG000000(JAK2 | cis | 0 | 5.74E-17 Blood | 7.05E-26 |
| rs2146040  | 9 | 5260039 | ENSG000000(JAK2 | cis | 0 | 6.34E-17 Blood | 1.35E-21 |
| rs7870536  | 9 | 5245493 | ENSG000000(JAK2 | cis | 0 | 6.46E-17 Blood | 9.41E-23 |
| rs10283467 | 9 | 5244356 | ENSG000000(JAK2 | cis | 0 | 6.55E-17 Blood | 2.10E-23 |
| rs7850228  | 9 | 5210671 | ENSG000000(JAK2 | cis | 0 | 9.97E-17 Blood | 6.59E-19 |
| rs12347727 | 9 | 5000811 | ENSG000000(JAK2 | cis | 0 | 2.75E-16 Blood | 1.01E-35 |
| rs3780367  | 9 | 5068755 | ENSG000000(JAK2 | cis | 0 | 2.76E-16 Blood | 4.36E-34 |
| rs7859390  | 9 | 5062473 | ENSG000000(JAK2 | cis | 0 | 2.99E-16 Blood | 5.16E-34 |
| rs7862042  | 9 | 5268139 | ENSG000000(JAK2 | cis | 0 | 3.05E-16 Blood | 1.79E-19 |
| rs7851556  | 9 | 5022807 | ENSG000000(JAK2 | cis | 0 | 3.37E-16 Blood | 4.87E-34 |
| rs2149555  | 9 | 5053743 | ENSG000000(JAK2 | cis | 0 | 3.75E-16 Blood | 2.46E-34 |
| rs10121491 | 9 | 5046935 | ENSG000000(JAK2 | cis | 0 | 3.76E-16 Blood | 1.70E-33 |
| rs7036761  | 9 | 5198781 | ENSG000000(JAK2 | cis | 0 | 4.95E-16 Blood | 4.14E-19 |
| rs10815149 | 9 | 5063701 | ENSG000000(JAK2 | cis | 0 | 5.23E-16 Blood | 8.97E-33 |
| rs10974944 | 9 | 5070831 | ENSG000000(JAK2 | cis | 0 | 7.01E-16 Blood | 4.66E-34 |
| rs3780366  | 9 | 5068596 | ENSG000000(JAK2 | cis | 0 | 8.17E-16 Blood | 4.74E-34 |
| rs11999802 | 9 | 5189773 | ENSG000000(JAK2 | cis | 0 | 1.22E-15 Blood | 2.75E-17 |
| rs10974914 | 9 | 5014332 | ENSG000000(JAK2 | cis | 0 | 1.54E-15 Blood | 5.23E-33 |
| rs7030260  | 9 | 5008070 | ENSG000000(JAK2 | cis | 0 | 2.96E-15 Blood | 8.00E-33 |
| rs4425810  | 9 | 5222208 | ENSG000000(JAK2 | cis | 0 | 3.12E-15 Blood | 7.89E-21 |
| rs4142064  | 9 | 5221818 | ENSG000000(JAK2 | cis | 0 | 3.48E-15 Blood | 6.75E-21 |
| rs10975003 | 9 | 5213687 | ENSG000000(JAK2 | cis | 0 | 5.21E-15 Blood | 2.05E-16 |

|            |    |             |                   |     |    |      |                      |          |
|------------|----|-------------|-------------------|-----|----|------|----------------------|----------|
| rs2224571  | 9  | 5196253     | ENSG000000(JAK2   | cis |    | 0    | 7.69E-15 Blood       | 4.20E-23 |
| rs7034878  | 9  | 5058991     | ENSG000000(JAK2   | Cis | NA |      | 2.42E-12 Whole blood | 1.36E-15 |
| rs7034878  | 9  | 5058991     | ENSG000000(JAK2   | Cis | NA |      | 9.36E-12 Whole blood | 1.36E-15 |
| rs7849191  | 9  | 4988761     | ENSG000000(JAK2   | cis |    | 0    | 2.24E-11 Blood       | 5.31E-24 |
| rs10974892 | 9  | 4964774     | ENSG000000(JAK2   | cis |    | 0    | 2.72E-11 Blood       | 1.89E-16 |
| rs10758669 | 9  | 4981602     | ENSG000000(JAK2   | cis |    | 0    | 4.83E-11 Blood       | 7.88E-45 |
| rs1536800  | 9  | 5055434     | ENSG000000(JAK2   | cis |    | 0    | 7.95E-11 Blood       | 3.31E-31 |
| rs7034878  | 9  | 5058991     | ENSG000000(JAK2   | Cis | NA |      | 8.67E-08 Whole blood | 1.36E-15 |
| rs10758677 | 9  | 5188078 --- | ENSG000000(JAK2   | Cis |    | 0.1  | 9.51E-08 Blood       | 2.10E-14 |
| rs7847294  | 9  | 5097281 --- | ENSG000000(JAK2   | Cis |    | 0.1  | 1.42E-07 Blood       | 1.18E-14 |
| rs2230724  | 9  | 5081780 --- | ENSG000000(JAK2   | Cis |    | 0.1  | 2.26E-07 Blood       | 5.57E-17 |
| rs7032169  | 9  | 4966178     | ENSG000000(JAK2   | cis |    | 0.01 | 1.23E-05 Blood       | 5.82E-15 |
| rs11041476 | 11 | 1875067     | ENSG000000(LSP1   | Cis | NA |      | 1.11E-12 Whole blood | 3.28E-10 |
| rs11041476 | 11 | 1875067     | ENSG000000(LSP1   | Cis | NA |      | 5.63E-09 Whole blood | 3.28E-10 |
| rs11041476 | 11 | 1875067     | ENSG000000(LSP1   | Cis | NA |      | 3.56E-05 Whole blood | 3.28E-10 |
| rs10908812 | 1  | 160879316   | ENSG000000(LY9    | cis |    | 0    | 0 Blood              | 6.76E-07 |
| rs11265510 | 1  | 160859559   | ENSG000000(LY9    | cis |    | 0    | 0 Blood              | 7.76E-07 |
| rs1333062  | 1  | 160846284   | ENSG000000(LY9    | cis |    | 0    | 0 Blood              | 2.58E-08 |
| rs2039415  | 1  | 160854445   | ENSG000000(LY9    | cis |    | 0    | 0 Blood              | 1.02E-08 |
| rs3820094  | 1  | 160849082   | ENSG000000(LY9    | cis |    | 0    | 0 Blood              | 2.35E-08 |
| rs4656956  | 1  | 160847617   | ENSG000000(LY9    | cis |    | 0    | 0 Blood              | 2.21E-08 |
| rs4656957  | 1  | 160850280   | ENSG000000(LY9    | cis |    | 0    | 0 Blood              | 2.91E-08 |
| rs7411035  | 1  | 160856076   | ENSG000000(LY9    | cis |    | 0    | 0 Blood              | 2.94E-08 |
| rs10763790 | 10 | 30791355    | ENSG000000(MAP3K8 | cis |    | 0    | 0 Blood              | 9.05E-07 |
| rs2771242  | 10 | 30762973    | ENSG000000(MAP3K8 | cis |    | 0    | 1.58E-18 Blood       | 9.95E-08 |
| rs593400   | 10 | 30762088    | ENSG000000(MAP3K8 | cis |    | 0    | 1.74E-18 Blood       | 7.18E-08 |
| rs619864   | 10 | 30750950    | ENSG000000(MAP3K8 | cis |    | 0    | 3.14E-18 Blood       | 9.27E-08 |
| rs603072   | 10 | 30755778    | ENSG000000(MAP3K8 | cis |    | 0    | 3.36E-18 Blood       | 4.80E-08 |
| rs598672   | 10 | 30742388    | ENSG000000(MAP3K8 | cis |    | 0    | 3.85E-18 Blood       | 1.32E-07 |
| rs602097   | 10 | 30747546    | ENSG000000(MAP3K8 | cis |    | 0    | 4.73E-18 Blood       | 1.56E-07 |
| rs602966   | 10 | 30755853    | ENSG000000(MAP3K8 | cis |    | 0    | 6.27E-18 Blood       | 7.16E-08 |
| rs10826797 | 10 | 30690376    | ENSG000000(MAP3K8 | cis |    | 0    | 7.43E-16 Blood       | 7.91E-08 |

|            |    |          |                  |     |    |      |                      |          |
|------------|----|----------|------------------|-----|----|------|----------------------|----------|
| rs303428   | 10 | 30739058 | ENSG000001MAP3K8 | cis |    | 0    | 5.17E-15 Blood       | 3.27E-08 |
| rs10763790 | 10 | 30791355 | ENSG000001MAP3K8 | Cis | NA |      | 7.11E-13 Whole blood | 9.05E-07 |
| rs2265186  | 10 | 30691743 | ENSG000001MAP3K8 | cis |    | 0    | 2.00E-12 Blood       | 7.04E-10 |
| rs6481677  | 10 | 30701816 | ENSG000001MAP3K8 | cis |    | 0    | 2.54E-12 Blood       | 7.69E-10 |
| rs1543725  | 10 | 30698873 | ENSG000001MAP3K8 | cis |    | 0    | 2.65E-12 Blood       | 5.02E-10 |
| rs2480277  | 10 | 30703513 | ENSG000001MAP3K8 | cis |    | 0    | 2.84E-12 Blood       | 9.69E-10 |
| rs1042058  | 10 | 30728101 | ENSG000001MAP3K8 | cis |    | 0    | 3.48E-12 Blood       | 2.10E-10 |
| rs303436   | 10 | 30731893 | ENSG000001MAP3K8 | cis |    | 0    | 7.47E-12 Blood       | 1.64E-08 |
| rs694346   | 10 | 30711929 | ENSG000001MAP3K8 | cis |    | 0    | 1.73E-11 Blood       | 5.60E-08 |
| rs1536833  | 10 | 30699265 | ENSG000001MAP3K8 | cis |    | 0    | 2.13E-11 Blood       | 1.53E-07 |
| rs10763790 | 10 | 30791355 | ENSG000001MAP3K8 | Cis | NA |      | 8.58E-09 Whole blood | 9.05E-07 |
| rs306583   | 10 | 30710057 | ENSG000001MAP3K8 | cis |    | 0    | 9.76E-09 Blood       | 6.07E-09 |
| rs10763790 | 10 | 30791355 | ENSG000001MAP3K8 | Cis | NA |      | 7.46E-08 Whole blood | 9.05E-07 |
| rs2072711  | 22 | 37268555 | LRG_159 NCF4     | cis |    | 0    | 0 Blood              | 1.00E-10 |
| rs2072711  | 22 | 37268555 | LRG_159 NCF4     | cis |    | 0    | 1.50E-18 Blood       | 1.00E-10 |
| rs2072711  | 22 | 37268555 | LRG_159 NCF4     | cis |    | 0    | 1.67E-10 Blood       | 1.00E-10 |
| rs11660128 | 18 | 77227950 | ENSG000001NFATC1 | cis |    | 0    | 0 Blood              | 2.31E-07 |
| rs11664153 | 18 | 77195813 | ENSG000001NFATC1 | cis |    | 0    | 0 Blood              | 3.10E-07 |
| rs11664725 | 18 | 77192116 | ENSG000001NFATC1 | cis |    | 0    | 0 Blood              | 5.06E-08 |
| rs3786185  | 18 | 77199023 | ENSG000001NFATC1 | cis |    | 0    | 0 Blood              | 7.24E-08 |
| rs7236492  | 18 | 77220616 | ENSG000001NFATC1 | cis |    | 0    | 0 Blood              | 1.00E-10 |
| rs7236492  | 18 | 77220616 | ENSG000001NFATC1 | cis |    | 0    | 0 Blood              | 3.05E-07 |
| rs3786185  | 18 | 77199023 | ENSG000001NFATC1 | cis |    | 0.01 | 1.94E-05 Blood       | 7.24E-08 |
| rs11664725 | 18 | 77192116 | ENSG000001NFATC1 | cis |    | 0.01 | 2.33E-05 Blood       | 5.06E-08 |
| rs10521209 | 16 | 50755709 | LRG_177 NOD2     | cis |    | 0    | 0 Blood              | 7.96E-22 |
| rs1077861  | 16 | 50759547 | LRG_177 NOD2     | cis |    | 0    | 0 Blood              | 5.32E-11 |
| rs1109863  | 16 | 50692364 | LRG_177 NOD2     | cis |    | 0    | 0 Blood              | 7.05E-15 |
| rs11640716 | 16 | 50665089 | LRG_177 NOD2     | cis |    | 0    | 0 Blood              | 2.80E-14 |
| rs11647841 | 16 | 50743331 | LRG_177 NOD2     | cis |    | 0    | 0 Blood              | 7.76E-24 |
| rs12913    | 16 | 50668426 | LRG_177 NOD2     | cis |    | 0    | 0 Blood              | 2.52E-14 |
| rs12925755 | 16 | 50846162 | LRG_177 NOD2     | cis |    | 0    | 0 Blood              | 1.06E-17 |
| rs1420872  | 16 | 50807779 | LRG_177 NOD2     | cis |    | 0    | 0 Blood              | 5.62E-24 |

|            |    |          |         |      |     |   |         |          |
|------------|----|----------|---------|------|-----|---|---------|----------|
| rs1558663  | 16 | 50662844 | LRG_177 | NOD2 | cis | 0 | 0 Blood | 2.63E-14 |
| rs17221417 | 16 | 50739582 | LRG_177 | NOD2 | cis | 0 | 0 Blood | 1.45E-51 |
| rs17313265 | 16 | 50747704 | LRG_177 | NOD2 | cis | 0 | 0 Blood | 1.64E-57 |
| rs17314544 | 16 | 50820078 | LRG_177 | NOD2 | cis | 0 | 0 Blood | 2.60E-25 |
| rs1861758  | 16 | 50751787 | LRG_177 | NOD2 | cis | 0 | 0 Blood | 2.57E-21 |
| rs1861759  | 16 | 50745583 | LRG_177 | NOD2 | cis | 0 | 0 Blood | 1.79E-20 |
| rs2066843  | 16 | 50745199 | LRG_177 | NOD2 | cis | 0 | 0 Blood | 2.14E-57 |
| rs2066849  | 16 | 50687015 | LRG_177 | NOD2 | cis | 0 | 0 Blood | 1.91E-15 |
| rs2076756  | 16 | 50756881 | LRG_177 | NOD2 | cis | 0 | 0 Blood | 2.83E-62 |
| rs2111234  | 16 | 50734033 | LRG_177 | NOD2 | cis | 0 | 0 Blood | 3.86E-08 |
| rs2111435  | 16 | 50819910 | LRG_177 | NOD2 | cis | 0 | 0 Blood | 4.10E-16 |
| rs3135500  | 16 | 50766886 | LRG_177 | NOD2 | cis | 0 | 0 Blood | 3.72E-21 |
| rs3785142  | 16 | 50787147 | LRG_177 | NOD2 | cis | 0 | 0 Blood | 2.51E-16 |
| rs4486887  | 16 | 50677571 | LRG_177 | NOD2 | cis | 0 | 0 Blood | 1.92E-15 |
| rs4785224  | 16 | 50730446 | LRG_177 | NOD2 | cis | 0 | 0 Blood | 6.59E-23 |
| rs4785227  | 16 | 50842197 | LRG_177 | NOD2 | cis | 0 | 0 Blood | 4.66E-15 |
| rs4785450  | 16 | 50792268 | LRG_177 | NOD2 | cis | 0 | 0 Blood | 3.67E-20 |
| rs4785452  | 16 | 50842077 | LRG_177 | NOD2 | cis | 0 | 0 Blood | 4.66E-15 |
| rs5743266  | 16 | 50731096 | LRG_177 | NOD2 | cis | 0 | 0 Blood | 1.22E-49 |
| rs6500331  | 16 | 50808726 | LRG_177 | NOD2 | cis | 0 | 0 Blood | 2.66E-19 |
| rs7186262  | 16 | 50686959 | LRG_177 | NOD2 | cis | 0 | 0 Blood | 1.42E-15 |
| rs7194886  | 16 | 50725193 | LRG_177 | NOD2 | cis | 0 | 0 Blood | 8.65E-30 |
| rs7199150  | 16 | 50676514 | LRG_177 | NOD2 | cis | 0 | 0 Blood | 1.48E-14 |
| rs7342715  | 16 | 50787483 | LRG_177 | NOD2 | cis | 0 | 0 Blood | 6.85E-20 |
| rs745230   | 16 | 50670182 | LRG_177 | NOD2 | cis | 0 | 0 Blood | 4.06E-14 |
| rs748855   | 16 | 50751398 | LRG_177 | NOD2 | cis | 0 | 0 Blood | 1.37E-21 |
| rs749985   | 16 | 50673651 | LRG_177 | NOD2 | cis | 0 | 0 Blood | 2.52E-14 |
| rs751271   | 16 | 50751175 | LRG_177 | NOD2 | cis | 0 | 0 Blood | 1.15E-08 |
| rs8047222  | 16 | 50660962 | LRG_177 | NOD2 | cis | 0 | 0 Blood | 6.39E-16 |
| rs8057341  | 16 | 50737980 | LRG_177 | NOD2 | cis | 0 | 0 Blood | 1.79E-07 |
| rs9635531  | 16 | 50841795 | LRG_177 | NOD2 | cis | 0 | 0 Blood | 2.87E-19 |
| rs9938976  | 16 | 50817219 | LRG_177 | NOD2 | cis | 0 | 0 Blood | 2.03E-24 |

|            |    |          |            |         |      |      |          |          |          |          |
|------------|----|----------|------------|---------|------|------|----------|----------|----------|----------|
| rs9673419  | 16 | 50661273 | LRG_177    | NOD2    | cis  | 0    | 3.10E-19 | Blood    | 8.10E-17 |          |
| rs1990623  | 16 | 50565970 | LRG_177    | NOD2    | cis  | 0    | 2.45E-18 | Blood    | 5.97E-11 |          |
| rs2111234  | 16 | 50734033 | ENSG000001 | LRG_177 | NOD2 | Cis  | 0.1      | 1.26E-15 | Blood    | 3.86E-08 |
| rs8057341  | 16 | 50737980 | ENSG000001 | LRG_177 | NOD2 | Cis  | 0.1      | 3.23E-15 | Blood    | 1.79E-07 |
| rs1077861  | 16 | 50759547 | ENSG000001 | LRG_177 | NOD2 | Cis  | 0.1      | 9.51E-15 | Blood    | 5.32E-11 |
| rs751271   | 16 | 50751175 | ENSG000001 | LRG_177 | NOD2 | Cis  | 0.1      | 1.07E-13 | Blood    | 1.15E-08 |
| rs5743266  | 16 | 50731096 | ENSG000001 | LRG_177 | NOD2 | Cis  | 0.1      | 5.38E-06 | Blood    | 1.22E-49 |
| rs17221417 | 16 | 50739582 | ENSG000001 | LRG_177 | NOD2 | Cis  | 0.1      | 9.19E-06 | Blood    | 1.45E-51 |
| rs2297441  | 20 | 62327582 | ENSG000002 | RTEL1   | cis  | 0.01 | 2.06E-05 | Blood    | 1.67E-20 |          |
| rs2257885  | 20 | 62334220 | ENSG000002 | RTEL1   | cis  | 0.01 | 2.13E-05 | Blood    | 2.62E-19 |          |
| rs2427533  | 20 | 62365866 | ENSG000002 | RTEL1   | cis  | 0.01 | 3.07E-05 | Blood    | 1.61E-17 |          |
| rs2427530  | 20 | 62361737 | ENSG000002 | RTEL1   | cis  | 0.01 | 3.10E-05 | Blood    | 1.07E-17 |          |
| rs2738758  | 20 | 62349625 | ENSG000002 | RTEL1   | cis  | 0.02 | 4.77E-05 | Blood    | 2.72E-18 |          |
| rs2777938  | 20 | 62306208 | ENSG000002 | RTEL1   | cis  | 0.03 | 8.26E-05 | Blood    | 1.07E-12 |          |
| rs3016173  | 11 | 60790839 | ENSG000001 | SLC15A3 | cis  | 0    | 2.23E-08 | Blood    | 4.72E-07 |          |
| rs175102   | 11 | 60810757 | ENSG000001 | SLC15A3 | cis  | 0    | 2.91E-08 | Blood    | 6.55E-07 |          |
| rs11230563 | 11 | 60776209 | ENSG000001 | SLC15A3 | cis  | 0    | 4.78E-07 | Blood    | 9.03E-13 |          |
| rs175112   | 11 | 60825022 | ENSG000001 | SLC15A3 | cis  | 0    | 7.30E-06 | Blood    | 1.15E-10 |          |
| rs4780355  | 16 | 11347858 | ENSG000001 | SOCS1   | cis  | 0    | 2.95E-11 | Blood    | 1.20E-13 |          |
| rs4451969  | 16 | 11383519 | ENSG000001 | SOCS1   | cis  | 0    | 6.76E-11 | Blood    | 2.49E-12 |          |
| rs243325   | 16 | 11354497 | ENSG000001 | SOCS1   | cis  | 0    | 1.63E-10 | Blood    | 8.00E-14 |          |
| rs243323   | 16 | 11361202 | ENSG000001 | SOCS1   | cis  | 0    | 4.10E-10 | Blood    | 6.12E-15 |          |
| rs7193871  | 16 | 11455606 | ENSG000001 | SOCS1   | cis  | 0    | 2.49E-09 | Blood    | 1.33E-10 |          |
| rs1646025  | 16 | 11379938 | ENSG000001 | SOCS1   | cis  | 0.02 | 3.60E-05 | Blood    | 5.22E-12 |          |
| rs423674   | 16 | 11373405 | ENSG000001 | SOCS1   | cis  | 0.02 | 5.65E-05 | Blood    | 4.13E-12 |          |
| rs529866   | 16 | 11373320 | ENSG000001 | SOCS1   | cis  | 0.03 | 5.98E-05 | Blood    | 1.49E-12 |          |
| rs730086   | 17 | 40271757 | LRG_112    | STAT3   | cis  | 0    | 1.00E-20 | Blood    | 4.61E-10 |          |
| rs957970   | 17 | 40519890 | LRG_112    | STAT3   | cis  | 0    | 1.00E-20 | Blood    | 2.01E-20 |          |
| rs1026916  | 17 | 40529835 | LRG_112    | STAT3   | cis  | 0    | 2.00E-20 | Blood    | 1.48E-20 |          |
| rs12949918 | 17 | 40526273 | LRG_112    | STAT3   | cis  | 0    | 2.00E-20 | Blood    | 2.27E-21 |          |
| rs3816769  | 17 | 40498273 | LRG_112    | STAT3   | cis  | 0    | 2.00E-20 | Blood    | 1.55E-20 |          |
| rs7211777  | 17 | 40534075 | LRG_112    | STAT3   | cis  | 0    | 2.00E-20 | Blood    | 2.52E-20 |          |

|            |    |          |         |       |     |   |          |       |          |
|------------|----|----------|---------|-------|-----|---|----------|-------|----------|
| rs744166   | 17 | 40514201 | LRG_112 | STAT3 | cis | 0 | 2.00E-20 | Blood | 6.15E-22 |
| rs1026916  | 17 | 40529835 | LRG_112 | STAT3 | cis | 0 | 8.00E-20 | Blood | 1.48E-20 |
| rs7211777  | 17 | 40534075 | LRG_112 | STAT3 | cis | 0 | 1.10E-19 | Blood | 2.52E-20 |
| rs957970   | 17 | 40519890 | LRG_112 | STAT3 | cis | 0 | 1.30E-19 | Blood | 2.01E-20 |
| rs3816769  | 17 | 40498273 | LRG_112 | STAT3 | cis | 0 | 2.00E-19 | Blood | 1.55E-20 |
| rs744166   | 17 | 40514201 | LRG_112 | STAT3 | cis | 0 | 4.10E-19 | Blood | 6.15E-22 |
| rs12949918 | 17 | 40526273 | LRG_112 | STAT3 | cis | 0 | 7.80E-19 | Blood | 2.27E-21 |
| rs730086   | 17 | 40271757 | LRG_112 | STAT3 | cis | 0 | 7.01E-18 | Blood | 4.61E-10 |
| rs730086   | 17 | 40271757 | LRG_112 | STAT3 | cis | 0 | 1.08E-17 | Blood | 4.61E-10 |
| rs744166   | 17 | 40514201 | LRG_112 | STAT3 | cis | 0 | 9.13E-17 | Blood | 6.15E-22 |
| rs12949918 | 17 | 40526273 | LRG_112 | STAT3 | cis | 0 | 1.38E-16 | Blood | 2.27E-21 |
| rs7211777  | 17 | 40534075 | LRG_112 | STAT3 | cis | 0 | 1.50E-16 | Blood | 2.52E-20 |
| rs1026916  | 17 | 40529835 | LRG_112 | STAT3 | cis | 0 | 1.68E-16 | Blood | 1.48E-20 |
| rs957970   | 17 | 40519890 | LRG_112 | STAT3 | cis | 0 | 1.88E-16 | Blood | 2.01E-20 |
| rs3816769  | 17 | 40498273 | LRG_112 | STAT3 | cis | 0 | 2.44E-16 | Blood | 1.55E-20 |
| rs4796793  | 17 | 40542210 | LRG_112 | STAT3 | cis | 0 | 8.40E-16 | Blood | 5.89E-19 |
| rs9912773  | 17 | 40510534 | LRG_112 | STAT3 | cis | 0 | 1.69E-15 | Blood | 1.72E-18 |
| rs3785898  | 17 | 40515120 | LRG_112 | STAT3 | cis | 0 | 3.65E-15 | Blood | 1.72E-20 |
| rs6503695  | 17 | 40499533 | LRG_112 | STAT3 | cis | 0 | 3.73E-15 | Blood | 1.41E-20 |
| rs8069645  | 17 | 40494902 | LRG_112 | STAT3 | cis | 0 | 4.68E-15 | Blood | 2.39E-20 |
| rs8078731  | 17 | 40480381 | LRG_112 | STAT3 | cis | 0 | 7.23E-13 | Blood | 1.97E-11 |
| rs9912773  | 17 | 40510534 | LRG_112 | STAT3 | cis | 0 | 8.88E-13 | Blood | 1.72E-18 |
| rs4796793  | 17 | 40542210 | LRG_112 | STAT3 | cis | 0 | 1.04E-12 | Blood | 5.89E-19 |
| rs12601982 | 17 | 40461674 | LRG_112 | STAT3 | cis | 0 | 1.11E-12 | Blood | 8.19E-11 |
| rs8074524  | 17 | 40469598 | LRG_112 | STAT3 | cis | 0 | 1.75E-12 | Blood | 2.18E-12 |
| rs2293155  | 17 | 40460989 | LRG_112 | STAT3 | cis | 0 | 1.84E-12 | Blood | 9.28E-11 |
| rs9906989  | 17 | 40455846 | LRG_112 | STAT3 | cis | 0 | 2.14E-12 | Blood | 9.07E-11 |
| rs1053005  | 17 | 40465910 | LRG_112 | STAT3 | cis | 0 | 2.34E-12 | Blood | 4.85E-12 |
| rs8072215  | 17 | 40271970 | LRG_112 | STAT3 | cis | 0 | 2.57E-12 | Blood | 2.84E-07 |
| rs3809758  | 17 | 40471980 | LRG_112 | STAT3 | cis | 0 | 3.04E-12 | Blood | 2.26E-12 |
| rs739636   | 17 | 40281063 | LRG_112 | STAT3 | cis | 0 | 5.01E-12 | Blood | 3.10E-07 |
| rs2293154  | 17 | 40461003 | LRG_112 | STAT3 | cis | 0 | 7.82E-12 | Blood | 9.21E-11 |



|            |    |          |         |       |     |    |          |             |          |
|------------|----|----------|---------|-------|-----|----|----------|-------------|----------|
| rs4796793  | 17 | 40542210 | LRG_112 | STAT3 | cis | 0  | 2.25E-11 | Blood       | 5.89E-19 |
| rs9912773  | 17 | 40510534 | LRG_112 | STAT3 | cis | 0  | 3.11E-11 | Blood       | 1.72E-18 |
| rs3785898  | 17 | 40515120 | LRG_112 | STAT3 | cis | 0  | 5.59E-11 | Blood       | 1.72E-20 |
| rs2293158  | 17 | 40447558 | LRG_112 | STAT3 | cis | 0  | 6.05E-11 | Blood       | 4.06E-10 |
| rs8072215  | 17 | 40271970 | LRG_112 | STAT3 | cis | 0  | 7.76E-11 | Blood       | 2.84E-07 |
| rs7217728  | 17 | 40447401 | LRG_112 | STAT3 | cis | 0  | 8.00E-11 | Blood       | 4.43E-10 |
| rs16967637 | 17 | 40446422 | LRG_112 | STAT3 | cis | 0  | 8.35E-11 | Blood       | 3.43E-10 |
| rs3785898  | 17 | 40515120 | LRG_112 | STAT3 | cis | 0  | 8.45E-11 | Blood       | 1.72E-20 |
| rs8069645  | 17 | 40494902 | LRG_112 | STAT3 | cis | 0  | 9.81E-11 | Blood       | 2.39E-20 |
| rs4029774  | 17 | 40428961 | LRG_112 | STAT3 | cis | 0  | 1.32E-10 | Blood       | 1.71E-09 |
| rs8069645  | 17 | 40494902 | LRG_112 | STAT3 | cis | 0  | 1.32E-10 | Blood       | 2.39E-20 |
| rs7209222  | 17 | 40426489 | LRG_112 | STAT3 | cis | 0  | 1.57E-10 | Blood       | 8.85E-10 |
| rs16967611 | 17 | 40401567 | LRG_112 | STAT3 | cis | 0  | 1.59E-10 | Blood       | 2.53E-09 |
| rs9906933  | 17 | 40410045 | LRG_112 | STAT3 | cis | 0  | 1.59E-10 | Blood       | 1.85E-09 |
| rs16967620 | 17 | 40422341 | LRG_112 | STAT3 | cis | 0  | 1.70E-10 | Blood       | 1.69E-09 |
| rs6503692  | 17 | 40421513 | LRG_112 | STAT3 | cis | 0  | 1.70E-10 | Blood       | 3.03E-10 |
| rs7218653  | 17 | 40425320 | LRG_112 | STAT3 | cis | 0  | 1.79E-10 | Blood       | 8.14E-10 |
| rs8064638  | 17 | 40424255 | LRG_112 | STAT3 | cis | 0  | 1.83E-10 | Blood       | 1.31E-09 |
| rs8082391  | 17 | 40398973 | LRG_112 | STAT3 | cis | 0  | 1.86E-10 | Blood       | 1.91E-09 |
| rs739636   | 17 | 40281063 | LRG_112 | STAT3 | cis | 0  | 1.92E-10 | Blood       | 3.10E-07 |
| rs6503695  | 17 | 40499533 | LRG_112 | STAT3 | cis | 0  | 2.07E-10 | Blood       | 1.41E-20 |
| rs963987   | 17 | 40561679 | LRG_112 | STAT3 | cis | 0  | 2.07E-10 | Blood       | 5.03E-12 |
| rs2883456  | 17 | 40552794 | LRG_112 | STAT3 | cis | 0  | 2.55E-10 | Blood       | 6.69E-12 |
| rs744166   | 17 | 40514201 | LRG_112 | STAT3 | Cis | NA | 2.12E-09 | Whole blood | 6.15E-22 |
| rs6503695  | 17 | 40499533 | LRG_112 | STAT3 | cis | 0  | 2.57E-09 | Blood       | 1.41E-20 |
| rs2883456  | 17 | 40552794 | LRG_112 | STAT3 | cis | 0  | 4.92E-09 | Blood       | 6.69E-12 |
| rs963987   | 17 | 40561679 | LRG_112 | STAT3 | cis | 0  | 5.15E-09 | Blood       | 5.03E-12 |
| rs12601982 | 17 | 40461674 | LRG_112 | STAT3 | cis | 0  | 6.26E-08 | Blood       | 8.19E-11 |
| rs11079045 | 17 | 40587669 | LRG_112 | STAT3 | cis | 0  | 7.86E-08 | Blood       | 4.55E-10 |
| rs8078731  | 17 | 40480381 | LRG_112 | STAT3 | cis | 0  | 9.16E-08 | Blood       | 1.97E-11 |
| rs2293155  | 17 | 40460989 | LRG_112 | STAT3 | cis | 0  | 1.01E-07 | Blood       | 9.28E-11 |
| rs8078731  | 17 | 40480381 | LRG_112 | STAT3 | cis | 0  | 1.17E-07 | Blood       | 1.97E-11 |

|            |    |              |         |       |     |      |          |             |          |
|------------|----|--------------|---------|-------|-----|------|----------|-------------|----------|
| rs11079045 | 17 | 40587669     | LRG_112 | STAT3 | cis | 0    | 1.27E-07 | Blood       | 4.55E-10 |
| rs9906989  | 17 | 40455846     | LRG_112 | STAT3 | cis | 0    | 1.49E-07 | Blood       | 9.07E-11 |
| rs8072215  | 17 | 40271970     | LRG_112 | STAT3 | cis | 0    | 1.67E-07 | Blood       | 2.84E-07 |
| rs12601982 | 17 | 40461674     | LRG_112 | STAT3 | cis | 0    | 2.60E-07 | Blood       | 8.19E-11 |
| rs739636   | 17 | 40281063     | LRG_112 | STAT3 | cis | 0    | 3.15E-07 | Blood       | 3.10E-07 |
| rs2293155  | 17 | 40460989     | LRG_112 | STAT3 | cis | 0    | 3.65E-07 | Blood       | 9.28E-11 |
| rs2293154  | 17 | 40461003     | LRG_112 | STAT3 | cis | 0    | 3.90E-07 | Blood       | 9.21E-11 |
| rs744166   | 17 | 40514201     | LRG_112 | STAT3 | Cis | NA   | 4.53E-07 | Whole blood | 6.15E-22 |
| rs9906989  | 17 | 40455846     | LRG_112 | STAT3 | cis | 0    | 4.94E-07 | Blood       | 9.07E-11 |
| rs2293154  | 17 | 40461003     | LRG_112 | STAT3 | cis | 0    | 6.94E-07 | Blood       | 9.21E-11 |
| rs8074524  | 17 | 40469598     | LRG_112 | STAT3 | cis | 0    | 7.72E-07 | Blood       | 2.18E-12 |
| rs3809758  | 17 | 40471980     | LRG_112 | STAT3 | cis | 0    | 7.87E-07 | Blood       | 2.26E-12 |
| rs1053005  | 17 | 40465910     | LRG_112 | STAT3 | cis | 0    | 9.04E-07 | Blood       | 4.85E-12 |
| rs744166   | 17 | 40514201 --- | LRG_112 | STAT3 | Cis | 0.1  | 1.00E-06 | Blood       | 6.15E-22 |
| rs963987   | 17 | 40561679     | LRG_112 | STAT3 | cis | 0    | 1.37E-06 | Blood       | 5.03E-12 |
| rs2883456  | 17 | 40552794     | LRG_112 | STAT3 | cis | 0    | 1.59E-06 | Blood       | 6.69E-12 |
| rs8074524  | 17 | 40469598     | LRG_112 | STAT3 | cis | 0    | 3.44E-06 | Blood       | 2.18E-12 |
| rs1053005  | 17 | 40465910     | LRG_112 | STAT3 | cis | 0    | 4.41E-06 | Blood       | 4.85E-12 |
| rs3809758  | 17 | 40471980     | LRG_112 | STAT3 | cis | 0    | 4.78E-06 | Blood       | 2.26E-12 |
| rs1905339  | 17 | 40582296     | LRG_112 | STAT3 | cis | 0    | 8.40E-06 | Blood       | 4.20E-07 |
| rs11079045 | 17 | 40587669     | LRG_112 | STAT3 | cis | 0.01 | 1.60E-05 | Blood       | 4.55E-10 |
| rs2293158  | 17 | 40447558     | LRG_112 | STAT3 | cis | 0.02 | 3.52E-05 | Blood       | 4.06E-10 |
| rs16967637 | 17 | 40446422     | LRG_112 | STAT3 | cis | 0.02 | 4.48E-05 | Blood       | 3.43E-10 |
| rs7217728  | 17 | 40447401     | LRG_112 | STAT3 | cis | 0.02 | 4.58E-05 | Blood       | 4.43E-10 |
| rs4029774  | 17 | 40428961     | LRG_112 | STAT3 | cis | 0.03 | 6.74E-05 | Blood       | 1.71E-09 |
| rs7209222  | 17 | 40426489     | LRG_112 | STAT3 | cis | 0.03 | 7.40E-05 | Blood       | 8.85E-10 |
| rs16967611 | 17 | 40401567     | LRG_112 | STAT3 | cis | 0.03 | 7.65E-05 | Blood       | 2.53E-09 |
| rs8082391  | 17 | 40398973     | LRG_112 | STAT3 | cis | 0.03 | 7.65E-05 | Blood       | 1.91E-09 |
| rs16967620 | 17 | 40422341     | LRG_112 | STAT3 | cis | 0.03 | 7.91E-05 | Blood       | 1.69E-09 |
| rs6503692  | 17 | 40421513     | LRG_112 | STAT3 | cis | 0.03 | 7.91E-05 | Blood       | 3.03E-10 |
| rs9906933  | 17 | 40410045     | LRG_112 | STAT3 | cis | 0.03 | 8.01E-05 | Blood       | 1.85E-09 |
| rs7218653  | 17 | 40425320     | LRG_112 | STAT3 | cis | 0.03 | 8.28E-05 | Blood       | 8.14E-10 |

|            |    |           |            |        |     |      |          |       |          |
|------------|----|-----------|------------|--------|-----|------|----------|-------|----------|
| rs8064638  | 17 | 40424255  | LRG_112    | STAT3  | cis | 0.03 | 8.28E-05 | Blood | 1.31E-09 |
| rs2293154  | 17 | 40461003  | ENSG000001 | STAT5A | cis | 0    | 5.62E-07 | Blood | 9.21E-11 |
| rs12601982 | 17 | 40461674  | ENSG000001 | STAT5A | cis | 0    | 6.57E-07 | Blood | 8.19E-11 |
| rs2293155  | 17 | 40460989  | ENSG000001 | STAT5A | cis | 0    | 7.65E-07 | Blood | 9.28E-11 |
| rs9906989  | 17 | 40455846  | ENSG000001 | STAT5A | cis | 0    | 8.49E-07 | Blood | 9.07E-11 |
| rs8078731  | 17 | 40480381  | ENSG000001 | STAT5A | cis | 0    | 8.51E-07 | Blood | 1.97E-11 |
| rs8074524  | 17 | 40469598  | ENSG000001 | STAT5A | cis | 0    | 9.86E-07 | Blood | 2.18E-12 |
| rs1053005  | 17 | 40465910  | ENSG000001 | STAT5A | cis | 0    | 1.17E-06 | Blood | 4.85E-12 |
| rs3809758  | 17 | 40471980  | ENSG000001 | STAT5A | cis | 0    | 1.30E-06 | Blood | 2.26E-12 |
| rs6503695  | 17 | 40499533  | ENSG000001 | STAT5A | cis | 0.01 | 1.69E-05 | Blood | 1.41E-20 |
| rs8064638  | 17 | 40424255  | ENSG000001 | STAT5A | cis | 0.01 | 1.97E-05 | Blood | 1.31E-09 |
| rs9906933  | 17 | 40410045  | ENSG000001 | STAT5A | cis | 0.01 | 1.98E-05 | Blood | 1.85E-09 |
| rs16967611 | 17 | 40401567  | ENSG000001 | STAT5A | cis | 0.01 | 2.08E-05 | Blood | 2.53E-09 |
| rs4029774  | 17 | 40428961  | ENSG000001 | STAT5A | cis | 0.01 | 2.11E-05 | Blood | 1.71E-09 |
| rs7209222  | 17 | 40426489  | ENSG000001 | STAT5A | cis | 0.01 | 2.11E-05 | Blood | 8.85E-10 |
| rs16967620 | 17 | 40422341  | ENSG000001 | STAT5A | cis | 0.01 | 2.23E-05 | Blood | 1.69E-09 |
| rs6503692  | 17 | 40421513  | ENSG000001 | STAT5A | cis | 0.01 | 2.23E-05 | Blood | 3.03E-10 |
| rs16967637 | 17 | 40446422  | ENSG000001 | STAT5A | cis | 0.01 | 2.24E-05 | Blood | 3.43E-10 |
| rs7218653  | 17 | 40425320  | ENSG000001 | STAT5A | cis | 0.01 | 2.27E-05 | Blood | 8.14E-10 |
| rs2293158  | 17 | 40447558  | ENSG000001 | STAT5A | cis | 0.01 | 2.28E-05 | Blood | 4.06E-10 |
| rs7217728  | 17 | 40447401  | ENSG000001 | STAT5A | cis | 0.01 | 2.28E-05 | Blood | 4.43E-10 |
| rs8082391  | 17 | 40398973  | ENSG000001 | STAT5A | cis | 0.01 | 2.38E-05 | Blood | 1.91E-09 |
| rs8069645  | 17 | 40494902  | ENSG000001 | STAT5A | cis | 0.02 | 3.63E-05 | Blood | 2.39E-20 |
| rs3785898  | 17 | 40515120  | ENSG000001 | STAT5A | cis | 0.02 | 3.78E-05 | Blood | 1.72E-20 |
| rs4796793  | 17 | 40542210  | ENSG000001 | STAT5A | cis | 0.02 | 4.21E-05 | Blood | 5.89E-19 |
| rs9912773  | 17 | 40510534  | ENSG000001 | STAT5A | cis | 0.02 | 4.65E-05 | Blood | 1.72E-18 |
| rs10114470 | 9  | 117547772 | ENSG000001 | TNFSF8 | cis | 0    | 0        | Blood | 1.02E-30 |
| rs1322055  | 9  | 117669585 | ENSG000001 | TNFSF8 | cis | 0    | 0        | Blood | 2.87E-09 |
| rs3810936  | 9  | 117552885 | ENSG000001 | TNFSF8 | cis | 0    | 0        | Blood | 3.64E-31 |
| rs4246905  | 9  | 117553249 | ENSG000001 | TNFSF8 | cis | 0    | 0        | Blood | 2.80E-32 |
| rs4263839  | 9  | 117566440 | ENSG000001 | TNFSF8 | cis | 0    | 0        | Blood | 3.53E-31 |
| rs4574921  | 9  | 117538334 | ENSG000001 | TNFSF8 | cis | 0    | 0        | Blood | 5.05E-29 |

|            |   |           |                  |     |   |                |          |
|------------|---|-----------|------------------|-----|---|----------------|----------|
| rs6478108  | 9 | 117558703 | ENSG000001TNFSF8 | cis | 0 | 0 Blood        | 4.05E-31 |
| rs7040029  | 9 | 117619214 | ENSG000001TNFSF8 | cis | 0 | 0 Blood        | 5.48E-23 |
| rs7848647  | 9 | 117569046 | ENSG000001TNFSF8 | cis | 0 | 0 Blood        | 5.02E-31 |
| rs7866342  | 9 | 117627569 | ENSG000001TNFSF8 | cis | 0 | 0 Blood        | 3.16E-21 |
| rs911605   | 9 | 117654990 | ENSG000001TNFSF8 | cis | 0 | 0 Blood        | 1.16E-19 |
| rs7048659  | 9 | 117533289 | ENSG000001TNFSF8 | cis | 0 | 2.76E-16 Blood | 1.10E-07 |
| rs10114224 | 9 | 117613032 | ENSG000001TNFSF8 | cis | 0 | 1.11E-15 Blood | 6.63E-09 |
| rs10982427 | 9 | 117613696 | ENSG000001TNFSF8 | cis | 0 | 1.11E-15 Blood | 1.62E-08 |
| rs10982441 | 9 | 117647599 | ENSG000001TNFSF8 | cis | 0 | 1.26E-15 Blood | 8.69E-07 |
| rs7865494  | 9 | 117576479 | ENSG000001TNFSF8 | cis | 0 | 5.91E-15 Blood | 3.70E-11 |
| rs1419134  | 9 | 117587022 | ENSG000001TNFSF8 | cis | 0 | 1.42E-14 Blood | 4.13E-11 |
| rs2145929  | 9 | 117581940 | ENSG000001TNFSF8 | cis | 0 | 3.14E-14 Blood | 1.36E-11 |
| rs7868351  | 9 | 117584082 | ENSG000001TNFSF8 | cis | 0 | 8.95E-14 Blood | 1.65E-11 |
| rs10982412 | 9 | 117570856 | ENSG000001TNFSF8 | cis | 0 | 1.42E-12 Blood | 2.52E-10 |
| rs17292046 | 9 | 117587092 | ENSG000001TNFSF8 | cis | 0 | 2.39E-11 Blood | 4.68E-10 |
| rs10982396 | 9 | 117518929 | ENSG000001TNFSF8 | cis | 0 | 3.64E-11 Blood | 6.90E-10 |
| rs10759736 | 9 | 117523192 | ENSG000001TNFSF8 | cis | 0 | 3.70E-11 Blood | 4.59E-10 |
| rs7862325  | 9 | 117567137 | ENSG000001TNFSF8 | cis | 0 | 8.71E-11 Blood | 2.90E-07 |
| rs13300483 | 9 | 117643362 | ENSG000001TNFSF8 | cis | 0 | 5.87E-10 Blood | 4.48E-14 |
| rs7860414  | 9 | 117541450 | ENSG000001TNFSF8 | cis | 0 | 4.13E-09 Blood | 8.50E-11 |
| rs1407308  | 9 | 117570223 | ENSG000001TNFSF8 | cis | 0 | 8.43E-09 Blood | 1.50E-07 |
| rs7866570  | 9 | 117577189 | ENSG000001TNFSF8 | cis | 0 | 9.24E-09 Blood | 1.26E-07 |
| rs10982433 | 9 | 117620404 | ENSG000001TNFSF8 | cis | 0 | 1.32E-08 Blood | 1.33E-11 |
| rs16931895 | 9 | 117609919 | ENSG000001TNFSF8 | cis | 0 | 2.58E-08 Blood | 1.80E-13 |
| rs10982417 | 9 | 117589613 | ENSG000001TNFSF8 | cis | 0 | 2.78E-08 Blood | 4.03E-14 |
| rs2093403  | 9 | 117611913 | ENSG000001TNFSF8 | cis | 0 | 3.12E-08 Blood | 2.03E-12 |
| rs4262377  | 9 | 117589574 | ENSG000001TNFSF8 | cis | 0 | 3.66E-08 Blood | 7.08E-14 |

| Table S9: TRIM22 Sub network Annotation |               |                                                                                                                                                                                                                                                                                                                                                                                                                                                                                                                                                                                             |                                |
|-----------------------------------------|---------------|---------------------------------------------------------------------------------------------------------------------------------------------------------------------------------------------------------------------------------------------------------------------------------------------------------------------------------------------------------------------------------------------------------------------------------------------------------------------------------------------------------------------------------------------------------------------------------------------|--------------------------------|
| Gene                                    | Alias         | Category- Excerpt of reference                                                                                                                                                                                                                                                                                                                                                                                                                                                                                                                                                              | PMID                           |
| ADAR                                    | ADAR1         | Inhibits HIV in macs, interferon induction.                                                                                                                                                                                                                                                                                                                                                                                                                                                                                                                                                 | PMID: 25456137                 |
| FTSJD2                                  |               | Methyltransferase responsible for cap1 formation in human cells, first nucleotide of a capped nucleotide in RNA.                                                                                                                                                                                                                                                                                                                                                                                                                                                                            | PMID: 20713356                 |
| CITA                                    |               | MHCII transcription activation                                                                                                                                                                                                                                                                                                                                                                                                                                                                                                                                                              | PMID: 17043423                 |
| RFX5                                    |               | NLRCS cooperates with the RFX transcription factor complex to induce MHC class I gene expression.                                                                                                                                                                                                                                                                                                                                                                                                                                                                                           | PMID: 22490869 , PMID: 1210125 |
| LILRB4                                  | ILT3          | The upregulated expression of BCL6, SOCS1 and DUSP10 is integral to the signature of ILT3-Fc-induced CD8(+) T cells. These genes are known inhibitors of cytokine production and TCR signaling and is a marker for CD8 T suppressor cells.                                                                                                                                                                                                                                                                                                                                                  | PMID: 23018130                 |
| CLEC1A                                  |               | Natural killer c type lectin receptor                                                                                                                                                                                                                                                                                                                                                                                                                                                                                                                                                       |                                |
| FPR3                                    |               | H. pylori-derived peptide Hp(2-20) stimulates eosinophil migration through the engagement of FPR2 and FPR3, and also induces production of VEGF-A and TGF-beta, two key mediators of tissue remodelling.                                                                                                                                                                                                                                                                                                                                                                                    | PMID: 24067461                 |
| CXCR6                                   |               | The chemokine receptor CXCR6 controls the functional topography of interleukin-22 producing intestinal innate lymphoid cells.                                                                                                                                                                                                                                                                                                                                                                                                                                                               | PMID: 25456160                 |
| NAPSB                                   |               | Napsin B aspartic peptidase                                                                                                                                                                                                                                                                                                                                                                                                                                                                                                                                                                 |                                |
| GNGT2                                   |               | Phototransduction in retina                                                                                                                                                                                                                                                                                                                                                                                                                                                                                                                                                                 |                                |
| GNAI2                                   | GLUT6/9       | Gnai2 expression affects marginal zone B-cell development, splenic architecture, lymphoid follicle size, and germinal center morphology. Gnai2 expression is also needed for the proper alignment of MOMA-1(+) macrophages and MadCAM-1(+) endothelial cells along marginal zone sinuses in the spleen.                                                                                                                                                                                                                                                                                     | PMID: 20508603                 |
| SLC2A6                                  |               | Cell metabolism                                                                                                                                                                                                                                                                                                                                                                                                                                                                                                                                                                             |                                |
| CSF2RA                                  |               | Auto antibodies correlating with aggressive disease.                                                                                                                                                                                                                                                                                                                                                                                                                                                                                                                                        | PMID: 24503766                 |
| ICOS                                    |               | ICOS Coreceptor Signaling Inactivates the Transcription Factor FOXO1 to Promote Th Cell Differentiation. ICOS is required for the generation of both central and effector CD4+ memory T-cell populations following acute bacterial infection.                                                                                                                                                                                                                                                                                                                                               | PMID: 25754933                 |
| ST3GAL5                                 | GM3           | and integrin-mediated cell adhesion. The protein encoded by this gene is a type II membrane protein which catalyzes the formation of GM3 using lactosylceramide as the substrate.                                                                                                                                                                                                                                                                                                                                                                                                           | PMID: 26362868                 |
| SLC39A4                                 |               | A mouse model of acrodermatitis enteropathica: loss of intestine zinc transporter ZIP4 (Slc39a4) disrupts the stem cell niche and intestine integrity.                                                                                                                                                                                                                                                                                                                                                                                                                                      | PMID: 22737083                 |
| FAM65B                                  |               | Fam65b negatively regulates chemokine-induced responses, such as adhesion, morphological polarization, and migration. Fam65b is a new transcriptional target of FOXO1 that regulates RhoA signaling for T lymphocyte migration.                                                                                                                                                                                                                                                                                                                                                             | PMID: 25588844                 |
| LAP3                                    |               | Autophagy in yeast                                                                                                                                                                                                                                                                                                                                                                                                                                                                                                                                                                          |                                |
| CXCL9                                   |               | Anti microbial response: CXCR3 Chemokine Receptor Enables Local CD8+ T Cell Migration for the Destruction of Virus-Infected Cells in Skin.                                                                                                                                                                                                                                                                                                                                                                                                                                                  | PMID: 25643352, PMID: 25769611 |
| CD40LG                                  |               | Involved in activation and antigen presentation. Related to hyper IgM and is under selective pressure.                                                                                                                                                                                                                                                                                                                                                                                                                                                                                      | PMID: 26644385                 |
| NFAM1                                   |               | NFAM1 modulates B cell signaling through its ITAM, calcineurin/NFAT-activating and immunoreceptor tyrosine-based activation motif (ITAM)-containing protein (CNAIP) Y+TNF induced and activated TNF.CNAIP was preferentially expressed in neutrophils, monocytes, mast cells, and other immune-related cells. Activates TNFa and IL13 promoters.                                                                                                                                                                                                                                            | PMID: 15143214, PMID: 12615911 |
| ELK2AP                                  | ELK           | Elk-1 is a transcription factor whose activation by several mitogen-activated protein kinases (MAPKs) mediates the immediate early responses of the c-fos promoter to growth factors and other stimuli. In heavy chain IGH gene, ELK2 is a pseudo gene.                                                                                                                                                                                                                                                                                                                                     |                                |
| MMP25                                   | MT6-MMP       | MT6-MMP regulates neutrophil and monocyte chemotaxis and by generating "eat-me" signals upon vimentin cleavage potentially increases phagocytic removal of neutrophils to resolve inflammation.                                                                                                                                                                                                                                                                                                                                                                                             | PMID: 22367194                 |
| LRRCC33                                 |               | Identification and characterization of a unique leucine-rich repeat protein (LRRCC33) that inhibits Toll-like receptor-mediated NF- $\kappa$ B activation.                                                                                                                                                                                                                                                                                                                                                                                                                                  | PMID: 23545260                 |
| GM2A                                    | GM2-AP, SAP-3 | An activator protein which stimulates the enzymatic hydrolysis of N-acetylneuraminic acid, but not N-acetylglucosamine, from GM2. Suggested roles of Saps is their deregulating effect on various proteolytic cascades that constitute the major homeostatic systems in human hosts, including blood coagulation, fibrinolysis, and kallikrein-kinin systems, and SAP3 generated proinflammatory bradykinin-related peptides (kinins).                                                                                                                                                      | PMID: 8631864 , PMID: 25777036 |
| CECR1                                   | ADA2          | Human adenosine deaminase 2 induces differentiation of monocytes into macrophages and stimulates proliferation of T helper cells and macrophages. Identified biallelic CECR1 mutations in two patients consistent with ADA2 deficiency. Both patients demonstrated an upregulation of interferon stimulated gene transcripts in peripheral blood.                                                                                                                                                                                                                                           | PMID: 20453107, PMID: 25278811 |
| GNB4                                    | CMTD1F        | GNB isoforms are required for LFA-1 activation and chemokine induced downstream signal Rac-1, PlcB2, PlcB3.                                                                                                                                                                                                                                                                                                                                                                                                                                                                                 | PMID: 26468229                 |
| CD86                                    |               | Upregulation on IECs is correlated with disease activity.                                                                                                                                                                                                                                                                                                                                                                                                                                                                                                                                   | PMID: 25574091                 |
| SNX10                                   |               | Endosomal sorting nexin                                                                                                                                                                                                                                                                                                                                                                                                                                                                                                                                                                     | PMID: 26141367                 |
| GZMB                                    |               | Granzyme B-activated p53 interacts with Bcl-2 to promote cytotoxic lymphocyte-mediated apoptosis.                                                                                                                                                                                                                                                                                                                                                                                                                                                                                           | PMID: 26156785                 |
| MMP19                                   |               | MMP19 and MMP23B belong to the Matrix metalloproteases (MMPs) family, which are zinc-binding endopeptidases that are capable of degrading various components of the extracellular matrix.                                                                                                                                                                                                                                                                                                                                                                                                   | PMID: 18525579                 |
| PLA2G4F                                 |               | Pla2g4f, a phospholipase and Duox2 are colitis gene candidates- GPX metabolizes PLA2G4F and DUOX2 products.                                                                                                                                                                                                                                                                                                                                                                                                                                                                                 | PMID: 20872835                 |
| KDM2B                                   |               | The H3K36 demethylase Jhdmlb/Kdm2b regulates cell proliferation and senescence through p15(Ink4b).                                                                                                                                                                                                                                                                                                                                                                                                                                                                                          | PMID: 26237645                 |
| GPSM3                                   |               | G Protein signaling modulator-3 inhibits the inflammasome activity of NLRP3, and is involved in monocyte chemotaxis.                                                                                                                                                                                                                                                                                                                                                                                                                                                                        |                                |
| PDCD1LG2                                | PDL2          | Regulation of T cell activation and tolerance by PDL2, which is positively regulated by IRF1.                                                                                                                                                                                                                                                                                                                                                                                                                                                                                               | PMID:25053811                  |
| C1S                                     |               | Complement                                                                                                                                                                                                                                                                                                                                                                                                                                                                                                                                                                                  |                                |
| DRAM1                                   |               | Regulates apoptosis, promotes targeting of mycobacteria to autophagy, the induction of the DNA damage-regulated autophagy modulator DRAM1 via the toll-like receptor (TLR)-MYD88-NFKB innate immunity signaling pathway/ p53 target gene that regulates autophagy and apoptosis.                                                                                                                                                                                                                                                                                                            | PMID: 25484076                 |
| SDC3                                    | SDCN, SYND3   | Syndecan-3 is a dendritic cell-specific attachment receptor for HIV-1, heparan sulfate (HS) proteoglycan .                                                                                                                                                                                                                                                                                                                                                                                                                                                                                  | PMID: 18040049                 |
| LILRB2                                  |               | LILRB2 interaction with HLA class I correlates with control of HIV-1 infection.                                                                                                                                                                                                                                                                                                                                                                                                                                                                                                             | PMID: 24603468                 |
| CCDC71L                                 | C7orf74       | Gene related to atherosclerosis.                                                                                                                                                                                                                                                                                                                                                                                                                                                                                                                                                            |                                |
| PLA2G7                                  |               | Arachidonic acid program, upregulated upon neutrophil stimulation.                                                                                                                                                                                                                                                                                                                                                                                                                                                                                                                          | PMID: 26348085                 |
| SEN7                                    |               | senescence.                                                                                                                                                                                                                                                                                                                                                                                                                                                                                                                                                                                 | PMID: 26527005                 |
| PLXNC1                                  |               | The plexin receptor is involved in acute inflammation and leukocyte migration. Plexin C1 (VESPR/CD232) is identified as being involved in sCD100-mediated (expressed in immature DCs) effects on human monocytes. Down-regulation of plexin C1 expression during the in vitro differentiation process of monocytes to immature DCs, while concomitantly the surface expression of plexin B1 was induced.                                                                                                                                                                                    | PMID: 15746246, PMID: 15746244 |
| TMEM71                                  |               | ING2, in the P53 pathway, can be sumoylated by small ubiquitin-like modifier 1 (SUMO1) on lysine 195 both in vitro and in vivo.ING2 sumoylation enhances its association with Sin3a. TMEM71 (transmembrane protein 71) expression is regulated by ING2 sumoylation.                                                                                                                                                                                                                                                                                                                         | PMID: 20676127                 |
| ASB2                                    |               | We show that not only NOTCH but also ASB2 and SKP2 can promote the ubiquitination and degradation of JAK3. Also involved in immature DC migration, ASB2 $\alpha$ -mediated effects on cell spreading are due to loss of filamins.                                                                                                                                                                                                                                                                                                                                                           | PMID: 21969365                 |
| COL1A1                                  |               | Noncanonical STAT3 Activation Regulates Excess TGF- $\beta$ 1 and Collagen I Expression in Muscle of Structuring Crohn's Disease.                                                                                                                                                                                                                                                                                                                                                                                                                                                           | PMID: 259140948                |
| AKAP11                                  | AKAP220       | AKAP220/IQGAP1 networks receive and integrate calcium and cAMP second messenger signals and position signaling enzymes near their intended substrates at leading edges of migrating cells.                                                                                                                                                                                                                                                                                                                                                                                                  | PMID: 21890631                 |
| MX2                                     |               | Interferon induced anti viral restriction factor                                                                                                                                                                                                                                                                                                                                                                                                                                                                                                                                            | PMID: 24760893                 |
| SPIB                                    |               | essential for the differentiation of intestinal microfold cells. Peyer's patch M cells derived from Lgr5(+) stem cells require SpiB and are induced by RankL in cultured "miniguts".                                                                                                                                                                                                                                                                                                                                                                                                        | PMID: 23439650 , PMID: 2270634 |
| CD1E                                    |               | The interaction of LAPTMs with CD1e and their colocalization in antigen processing compartments both suggest that LAPTMs might influence the role of CD1e in the presentation of lipid antigens.                                                                                                                                                                                                                                                                                                                                                                                            | PMID: 22880058                 |
| MTX3                                    |               | Metaxin deficiency alters mitochondrial membrane permeability and leads to resistance of TNF induced killing.                                                                                                                                                                                                                                                                                                                                                                                                                                                                               | PMID: 21088703                 |
| UBE2E2                                  | UBCH8         | UbcH8, an ubiquitin E2 conjugating enzyme, was shown to be involved in RIG-I ISGylation. UbcH8 suppressed RIG-I ubiquitination by RNF125, and this suppression was relieved by ectopic expression of ISG15.                                                                                                                                                                                                                                                                                                                                                                                 | PMID:25960396                  |
| CXCL5                                   |               | Neutrophil recruitment. De-regulation in the intestinal epithelium in peridiatric IBD reported in this pathway.                                                                                                                                                                                                                                                                                                                                                                                                                                                                             | PMID: 25738378                 |
| ARID5A                                  |               | AT-rich-interactive domain-containing protein 5A functions as a negative regulator of retinoic acid receptor-related orphan nuclear receptor $\gamma$ -induced Th17 cell differentiation. Controls IL6 levels.                                                                                                                                                                                                                                                                                                                                                                              | PMID: 23676272                 |
| TIMP1                                   |               | MMP-3 and TIMP-1: inhibitor of MMPs activity by myofibroblast involved in ulcers in CD.                                                                                                                                                                                                                                                                                                                                                                                                                                                                                                     | PMID: 24583398                 |
| SIGLEC9                                 |               | Binding of the sialic acid-binding lectin, Siglec-9, to the membrane mucin, MUC1, induces recruitment of $\beta$ -catenin and subsequent cell growth. Colonic epithelial cells express specific ligands for mucosal macrophage immunosuppressive receptors siglec-7 and -9. 9 turned out to be resident macrophages characterized by low expression of CD14/CD89 and high expression of CD68/CD163. A minor subpopulation of CD8(+) T lymphocytes also expressed siglec-7/-9. Siglec-7/-9 ligation suppressed LPS-induced cyclooxygenase-2 expression and PGE(2) production by macrophages. | PMID: 24045940 , PMID: 2246765 |
| TIFA                                    |               | Intermolecular binding between TIFA-FHA and TIFA-pT mediates tumor necrosis factor alpha stimulation and NF- $\kappa$ B activation. Identification of TIFA as an adapter protein that links tumor necrosis factor receptor-associated factor 6 (TRAF6) to interleukin-1 (IL-1) receptor-associated kinase-1 (IRAK-1) in IL-1 receptor signaling.                                                                                                                                                                                                                                            | PMID: 22566686, PMID: 12566441 |
| TNFRSF6B                                | DCR3          | Targeted resequencing identifies defective variants of decoy receptor 3 in pediatric-onset inflammatory bowel disease. Differential expression of the TLIA/DeR3 system of TNF/TNFR-like proteins in large vs. small intestinal Crohn's disease. High intestinal and systemic levels of decoy receptor 3 (DeR3) and its ligand TLIA in active ulcerative colitis. An additive gene-gene interaction involving TLR4, PSMG1, TNFRSF6B and IRGM was identified with CD.                                                                                                                         | PMID: 23965943 , PMID: 2197857 |
| CEBPB                                   |               | Inflammatory cytokine production by human neutrophils involves C/EBP transcription factors.                                                                                                                                                                                                                                                                                                                                                                                                                                                                                                 | PMID: 19109189                 |
| PARP9                                   |               | DTX3L and ARTD9 inhibit IRF1 expression and mediate in cooperation with ARTD8 survival and proliferation of metastatic prostate cancer cells.                                                                                                                                                                                                                                                                                                                                                                                                                                               | PMID: 23487038                 |
| CENPV                                   |               | Kinetochore/ mitotic spindles                                                                                                                                                                                                                                                                                                                                                                                                                                                                                                                                                               |                                |
| CD40                                    |               | The interaction between CD40 and its ligand, CD40L/CD154, is crucial for the efficient initiation and regulation of immune responses against viruses.                                                                                                                                                                                                                                                                                                                                                                                                                                       | PMID: 25765994                 |
| DOK3                                    |               | DOK3 is required for IFN- $\beta$ production by enabling TRAF3/TBK1 complex formation and IRF3 activation. Also involved in LPS response in macrophages.                                                                                                                                                                                                                                                                                                                                                                                                                                    | PMID: 24929003                 |
| S1PR4                                   |               | S1PR4 is required for plasmacytoid dendritic cell differentiation.                                                                                                                                                                                                                                                                                                                                                                                                                                                                                                                          | PMID: 25720060                 |
| GMFG                                    |               | Glia maturation factor- $\gamma$ negatively modulates TLR4 signaling by facilitating TLR4 endocytic trafficking in macrophages. GMFG is a component of human T cell pseudopodia required for migration. Glia maturation factor- $\gamma$ mediates neutrophil chemotaxis.                                                                                                                                                                                                                                                                                                                    | PMID: 23677465, PMID: 22510511 |
| ACP5                                    |               | A tartrate-resistant acid phosphatase. Disruption of the gene results in elevated serum interferon alpha activity, and gene expression profiling in whole blood defined a type I interferon signature.                                                                                                                                                                                                                                                                                                                                                                                      | PMID: 21217755                 |
| TNFAIP2                                 |               | Inhibits NFKB and is an autoinhibitor of TNF during sepsis.                                                                                                                                                                                                                                                                                                                                                                                                                                                                                                                                 | PMID: 22078882, PMID: 26347481 |
| LYST                                    |               | Lysosomal trafficking regulator. LYST controls the biogenesis of the endosomal compartment required for secretory lysosome function.                                                                                                                                                                                                                                                                                                                                                                                                                                                        | PMID: 25425525                 |
| VPS13C                                  |               | Glucose insulin metabolism (potentially autophagy)                                                                                                                                                                                                                                                                                                                                                                                                                                                                                                                                          | PMID: 22962655                 |
| HV1                                     | HVCN1         | Involved in eosinophil effector functions. HV1 is among genes which correlate significantly with Crohn's clinical activity. Hv1 proton channels differentially regulate the pH of neutrophil and macrophage phagosomes by sustaining the production of phagosomal ROS that inhibit the delivery of vacuolar ATPases.                                                                                                                                                                                                                                                                        | PMID: 23437289, PMID: 24415791 |
| KCNAB2                                  |               | Voltage potassium channel                                                                                                                                                                                                                                                                                                                                                                                                                                                                                                                                                                   |                                |
| ITGB2                                   | CD18          | CD11b/CD18 (Mac-1) is a novel surface receptor for extracellular double-stranded RNA to mediate cellular inflammatory responses. DNA methylation-associated colonic mucosal immune and defense responses in treatment-naive pediatric ulcerative colitis.                                                                                                                                                                                                                                                                                                                                   | PMID: 23209319                 |
| CLEC7A                                  |               | Downregulated by Th17. polymorphism in the gene for Dectin-1 (CLEC7A) is strongly linked to a severe form of ulcerative colitis.                                                                                                                                                                                                                                                                                                                                                                                                                                                            | PMID: 22674328                 |

|          |              |                                                                                                                                                                                                                                                                                                                                                                                                                                                                                                                                                                  |                               |
|----------|--------------|------------------------------------------------------------------------------------------------------------------------------------------------------------------------------------------------------------------------------------------------------------------------------------------------------------------------------------------------------------------------------------------------------------------------------------------------------------------------------------------------------------------------------------------------------------------|-------------------------------|
| CXCL6    |              | Neutrophil cytokine in response to IEC cell line cultured with TNF and IL17.                                                                                                                                                                                                                                                                                                                                                                                                                                                                                     | PMID: 2661980                 |
| LIMS3L   |              | LM and senescent cell antigen-like domains 3-like                                                                                                                                                                                                                                                                                                                                                                                                                                                                                                                |                               |
| PLEKH02  |              | Identification of pleckstrin-homology-domain-containing proteins with novel phosphoinositide-binding specificities in signalling.                                                                                                                                                                                                                                                                                                                                                                                                                                |                               |
| FBX06    | FBS2         | Fbx2 is a new member of the E3 ubiquitin ligase family that recognizes sugar chains.. Inhibits ER stress by functioning as ubiquitin ligase in ERAD system.                                                                                                                                                                                                                                                                                                                                                                                                      | PMID: 12939278, PMID: 2537437 |
| SLAMF8   |              | Slamf8 is a negative regulator of Nox2 activity in macrophages.                                                                                                                                                                                                                                                                                                                                                                                                                                                                                                  | PMID: 22593622                |
| PSTPIP2  |              | Associated with autoinflammatory disease and anti HCV replication.                                                                                                                                                                                                                                                                                                                                                                                                                                                                                               | PMID: 22130530, PMID: 2439580 |
| NCF2     |              | NADPH / NCF2/p67phox: A novel player in the anti-apoptotic functions of p53 and can be induced by TNF $\alpha$ .                                                                                                                                                                                                                                                                                                                                                                                                                                                 | PMID: 21900546                |
| IL27RA   |              | Activation of IL-27 signalling promotes development of postinfluenza pneumococcal pneumonia.In response to i10, suppresses Th17 1117 and ifng related processes, copy induces TH1, also can be anti viral.                                                                                                                                                                                                                                                                                                                                                       | PMID: 24408967, PMID: 2508899 |
| ARHGAP30 |              | ArhGAP30 promotes p53 acetylation and function in colorectal cancer.                                                                                                                                                                                                                                                                                                                                                                                                                                                                                             | PMID: 25156493                |
| CSF3R    |              | G-CSF preferentially supports the generation of gut-homing Gr-1high macrophages in M-CSF-treated bone marrow cells.                                                                                                                                                                                                                                                                                                                                                                                                                                              | PMID: 24503766, PMID: 2498162 |
| MNDA     |              | The human PYHIN proteins, AIM2, IFI16, IFIX, and MNDA, are critical regulators of immune response, transcription, apoptosis, and cell cycle.                                                                                                                                                                                                                                                                                                                                                                                                                     |                               |
| FAH      |              | Fumarylacetoacetate hydrolase- an enzyme that catalyzes the last step of tyrosine metabolism.                                                                                                                                                                                                                                                                                                                                                                                                                                                                    | PMID: 24879068                |
| CLEC4A   | DCIR         | DCIR-mediated enhancement of HIV-1 infection requires the ITIM-associated signal transduction pathway. DCIR is endocytosed into human dendritic cells and inhibits TLR8-mediated cytokine production.                                                                                                                                                                                                                                                                                                                                                            | PMID: 19028959                |
| PTAFR    | PAF          | Associated with pneumococcal disease, PAF signaling in peritoneal macrophages requires TLR4, MyD88, and TRIF. In peritoneal macrophages, the PTAFR agonist carbamyl PAF induces production of inflammatory markers previously demonstrated to be upregulated during bacterially induced labor, including: inducible nitric oxide synthase (Nos2), the chemokine Ccl5 (RANTES), tumor necrosis factor (Tnf), and level of their end-products (NO, CCL5, TNF) in a process dependent upon both IkkappaB kinase and calcium/calmodulin-dependent protein kinase II. | PMID: 25253732, PMID: 2525373 |
| CD300A   |              | PPAR $\beta$ activation of CD300a controls intestinal immunity in M1 macs and binds phosphatidyserine on dying cells.                                                                                                                                                                                                                                                                                                                                                                                                                                            | PMID: 24958459                |
| CD42SE1  | SPEC1        | SPECs may play important roles in Cdc42-mediated F-actin accumulation at the immunological synapse.                                                                                                                                                                                                                                                                                                                                                                                                                                                              | PMID: 15840583                |
| GBP4     |              | GBP4 is a negative regulator of virus-triggered IFN-I production, and it is identified as a novel protein targeting IRF7 and inhibiting its function.                                                                                                                                                                                                                                                                                                                                                                                                            | PMID: 23029268, PMID: 2209571 |
| KYNU     |              | Kynureninase involved in the L-tryptophan aerobic degradation pathway.                                                                                                                                                                                                                                                                                                                                                                                                                                                                                           | PMID: 26347385, PMID: 2634738 |
| TLR8     |              | Toll-like receptor 8 (TLR8) was required for inducing pro-IL-1 $\beta$ expression, whereas the NLRP3 inflammasome was required for IL-1 $\beta$ maturation and release.                                                                                                                                                                                                                                                                                                                                                                                          | PMID: 24939850                |
| BID      |              | Tumor necrosis factor alpha triggers Bid-dependent lysosomal permeabilization, followed by release of cathepsin B into the cytosol and activation of caspase 2. Caspase 2 then facilitates efficient mitochondrial cytochrome c release and apoptosis.                                                                                                                                                                                                                                                                                                           | PMID: 16012953, PMID: 1601295 |
| FGR      |              | Src family kinases were required for the generation of the inflammatory environment in vivo and for the release of proinflammatory mediators from neutrophils and macrophages in vitro, likely due to their role in Fc $\gamma$ receptor signal transduction, but not involved in recruitment. ROS-triggered phosphorylation of complex II by Fgr kinase regulates cellular adaptation to fuel use.                                                                                                                                                              | PMID: 25225462, PMID: 2485693 |
| SLAMF7   | CS1          | Downregulated by CD40L on DCs. This structure and expression protein belonging to the CD8 family suggests a function as a co-receptor, perhaps in an antigen uptake complex, or in homing or recirculation of DC.                                                                                                                                                                                                                                                                                                                                                | PMID: 23695528                |
| IGSF6    | DORA         | Inflammasome up-regulation and activation in dysferlin-deficient skeletal muscle.                                                                                                                                                                                                                                                                                                                                                                                                                                                                                | PMID: 9809579                 |
| DYSF     |              | Protease-activated receptor-1 (PAR1) is a G protein-coupled receptor that is classically activated through cleavage of the N-terminal exodomain by the serine protease thrombin. Most recently, 2 MMPs have been discovered to have agonist activity for PAR1:MMP-1 and MMP-13                                                                                                                                                                                                                                                                                   | PMID: 20413686                |
| F2R      | PAR1         | EMR2 receptor ligation modulates cytokine secretion profiles and cell survival of lipopolysaccharide-treated neutrophils. CD312, the human adhesion-GPCR EMR2, is differentially expressed during differentiation, maturation, and activation of myeloid cells.                                                                                                                                                                                                                                                                                                  | PMID: 23086754                |
| EMR2     |              | LILRA5 is expressed by synovial tissue macrophages in rheumatoid arthritis, selectively induces pro-inflammatory cytokines and IL-10 and is regulated by TNF-alpha, IL-10 and IFN-gamma.                                                                                                                                                                                                                                                                                                                                                                         | PMID: 22035891, PMID: 1717427 |
| LILRA5   |              | Regulation of the extrinsic apoptotic pathway by the extracellular matrix glycoprotein EMILIN2.                                                                                                                                                                                                                                                                                                                                                                                                                                                                  | PMID: 19009525                |
| EMILIN2  |              | Thromboxane A synthase (TBXAS1) converts prostaglandin H to thromboxane A.                                                                                                                                                                                                                                                                                                                                                                                                                                                                                       | PMID: 17698584                |
| TBXAS1   |              | A distal locus element mediates IFN- $\gamma$ priming of lipopolysaccharide-stimulated TNF gene expression. Data suggests that during intestinal inflammation, the TNF- $\alpha$ -mediated activation of IRF1 is related to the subsequent suppression of OPN expression, further reducing p-AKT, p-P38, and p-ERK activities and resulting in aggravation of the injury to intestinal epithelial cells.                                                                                                                                                         | PMID: 25482561, PMID: 2520810 |
| IRF1     | ESP-2, HED-2 | ZYX-1 protein is expressed in the striated body-wall muscles and is involved in dystrophin-dependent muscle.                                                                                                                                                                                                                                                                                                                                                                                                                                                     |                               |
| ZYX      |              | Gamma interferon-induced guanylate binding protein 1 is a novel actin cytoskeleton remodeling factor.                                                                                                                                                                                                                                                                                                                                                                                                                                                            | PMID: 24190970                |
| GBP1P1   |              | Lipid exchange and transport                                                                                                                                                                                                                                                                                                                                                                                                                                                                                                                                     |                               |
| APOL4    | CD16         | Associated with susceptibility to autoimmunity. Influences response to Infliximab through ADCC.                                                                                                                                                                                                                                                                                                                                                                                                                                                                  | PMID: 26407570, PMID: 2335893 |
| FCGR3A   | UBCH5        | Ubch5 is an E2 ubiquitin-conjugating enzyme catalyzing ubiquitination during TNF- $\alpha$ -triggered NF- $\kappa$ B activation. Inhibition leads to p53 apoptosis.                                                                                                                                                                                                                                                                                                                                                                                              | PMID: 25200604                |
| UBE2D1   |              | Lysosomal stress in obese adipose tissue macrophages contributes to MITF-dependent Gpnmb induction.                                                                                                                                                                                                                                                                                                                                                                                                                                                              | PMID: 24789918                |
| GNPMB    | RRAS3        | Ras oncogene, MRAS, through its ability to recruit a complex with paradoxical components, coordinates ERK pathway. Involved in intestinal fibrosis in CD rats.                                                                                                                                                                                                                                                                                                                                                                                                   | PMID: 23970928, PMID: 2386348 |
| MRAS     |              | Seven nonsynonymous SNPs in the gene encoding human deoxyribonuclease II may serve as a functional SNP potentially implicated in autoimmune dysfunction.                                                                                                                                                                                                                                                                                                                                                                                                         | PMID: 24242851                |
| DNASE2   |              | Anti viral response, DNA binding.                                                                                                                                                                                                                                                                                                                                                                                                                                                                                                                                | PMID: 25547032                |
| MSANTD3  | PINCH3       | Pinch-3 protein is an important constituent of cell membranes, which directly affects the cell morphology and mechanical properties.                                                                                                                                                                                                                                                                                                                                                                                                                             | PMID: 23865313                |
| LIMS3    |              | IL2 receptor chain expressed on FoxP3 regulatory T cells.                                                                                                                                                                                                                                                                                                                                                                                                                                                                                                        | PMID: 24483245                |
| IL2RA    | p47          | p47 negatively regulates IKK activation by inducing the lysosomal degradation of polyubiquitinated NEMO.                                                                                                                                                                                                                                                                                                                                                                                                                                                         | PMID: 22990857                |
| PLEK     |              | Mendelian myco bacteria response, type I and type II interferon signalling.                                                                                                                                                                                                                                                                                                                                                                                                                                                                                      |                               |
| STAT1    |              | Induction of IFNB                                                                                                                                                                                                                                                                                                                                                                                                                                                                                                                                                | PMID: 25733689                |
| PML      | TGFB1        | Controls proliferation and cellular differentiation. Involved in wound healing and mucosal immunity.                                                                                                                                                                                                                                                                                                                                                                                                                                                             | PMID: 26559094                |
| TGFB     |              | Expression of suppressor of cytokine signaling 1 (SOCS1) impairs viral clearance and exacerbates lung injury during influenza infection. Has been reported to play an important role in Treg cell integrity and function by protecting the cells from excessive inflammatory cytokines. Co-immunoprecipitation studies revealed that SOCS1 physically interacted with RHRTRIM5a.                                                                                                                                                                                 | PMID: 25500584, PMID: 2513319 |
| SOCS1    | CSP-beta     | Cysteine string proteins (CSPs) are associated with regulated secretory organelles.                                                                                                                                                                                                                                                                                                                                                                                                                                                                              |                               |
| DNAC5B   |              | P695. A mutation in CTLA4 associated with early-onset Crohn's disease and autoimmunity.                                                                                                                                                                                                                                                                                                                                                                                                                                                                          | PMID: 25718204                |
| CTLA4    |              | A candidate gene linking systemic inflammation to atherosclerosis; results of a human in vivo LPS infusion study.                                                                                                                                                                                                                                                                                                                                                                                                                                                | PMID: 21827714                |
| SLC43A3  |              | CHST1 and CHST2 contribute to the generation of optimal L-selectin ligands in vascular endothelial cells at sites of inflammation.                                                                                                                                                                                                                                                                                                                                                                                                                               | PMID: 11310842                |
| CHST2    |              | Pharmacological inhibition of TPL2/MAP3K8 blocks human cytotoxic T lymphocyte effector functions.TPL2 mediates autoimmune inflammation through activation of the TAK1 axis of IL-17 signaling.                                                                                                                                                                                                                                                                                                                                                                   | PMID: 24642963, PMID: 2498004 |
| MAP3K8   |              | IFN induced, interact with IRF, DCs                                                                                                                                                                                                                                                                                                                                                                                                                                                                                                                              | PMID: 23787991                |
| BATF2    |              | NOD2 synergized with IFN- $\gamma$ to induce CXCL9 and CXCL10 secretion in dendritic cells, macrophages, and intestinal stromal cells in vitro.                                                                                                                                                                                                                                                                                                                                                                                                                  | PMID: 24591373                |
| CXCL10   |              | APOL1 expression is induced by proinflammatory cytokines gamma interferon (IFN- $\gamma$ ) and tumor necrosis factor alpha (TNF- $\alpha$ ).                                                                                                                                                                                                                                                                                                                                                                                                                     | PMID: 24173214                |
| APOL1    |              | A novel anti-apoptotic role for apolipoprotein L2 in IFN- $\gamma$ -induced cytotoxicity in human bronchial epithelial cells.                                                                                                                                                                                                                                                                                                                                                                                                                                    | PMID: 20665705                |
| APOL2    |              | Inhibition of PDE4B suppresses inflammation by increasing expression of the deubiquitinase CYLD.                                                                                                                                                                                                                                                                                                                                                                                                                                                                 | PMID: 23575688, PMID: 2574878 |
| PDE4B    |              | Type I interferon related TB response. IL-15 modulates the balance between Bcl-2 and Bim via a Jak3/1-P13K-Akt-ERK pathway to promote CD8 $\alpha\alpha$ + intestinal intraepithelial lymphocyte survival.                                                                                                                                                                                                                                                                                                                                                       | PMID: 23754237                |
| IL15RA   |              | Biochemical signaling of PD-1 on T cells and its functional implications.                                                                                                                                                                                                                                                                                                                                                                                                                                                                                        | PMID: 25098287                |
| CD274    | GLUT3        | Hypoxia/IL-10 showed the enhanced induction of a set of genes including PLOD2 and SLC2A3. In cancer, mTORC1 enhances Glut3 expression through the activation of the IKK/NF $\kappa$ B pathway.                                                                                                                                                                                                                                                                                                                                                                   | PMID: 25450522                |
| SLC2A3   |              | Related to pathogenesis of metabolic disease.                                                                                                                                                                                                                                                                                                                                                                                                                                                                                                                    |                               |
| NNMT     |              | Clinical features of interleukin 10 receptor gene mutations in children with very early-onset inflammatory bowel disease.                                                                                                                                                                                                                                                                                                                                                                                                                                        | PMID: 25373860                |
| IL10RA   |              | $\gamma$ -Interferon-inducible lysosomal thiol reductase (GILT) maintains phagosomal proteolysis in alternatively activated macrophages.GILT expression in B cells diminishes cathepsin S steady-state protein expression and activity.                                                                                                                                                                                                                                                                                                                          | PMID: 25253686                |
| IFI30    | DANGER       | DANGER, a novel regulatory protein of inositol 1,4,5-trisphosphate-receptor activity. Individual subtypes of enteroendocrine cells in the mouse small intestine exhibit unique patterns of inositol 1,4,5-trisphosphate receptor expression.                                                                                                                                                                                                                                                                                                                     | PMID: 14688217                |
| ITPRIP   |              | SCIMP, a transmembrane adaptor protein involved in major histocompatibility complex class II signaling.                                                                                                                                                                                                                                                                                                                                                                                                                                                          | PMID: 21930792                |
| SCIMP    |              | The transcription factor GF11 negatively regulates NLRP3 inflammasome activation in macrophages. There are many other transcription factors, such as RUNX family proteins, IRF4, Dec2, Gfi1, Hlx, and JunB that can impair TH1/TH2 cells differentiation.                                                                                                                                                                                                                                                                                                        | PMID: 25447538, PMID: 2526120 |
| GF11     |              | E3 Ubiquitin ligase, Deltex1 antagonizes HIF-1 $\alpha$ and sustains the stability of regulatory T cells in vivo, Deltex1 is a target of the transcription factor NFAT that promotes T cell anergy.                                                                                                                                                                                                                                                                                                                                                              | PMID: 25695215, PMID: 1959227 |
| DTX1     | CP-2         | Ceruloplasmin (ferroxidase) / iron.                                                                                                                                                                                                                                                                                                                                                                                                                                                                                                                              |                               |
| CP       |              | Complement Factor H. Intestinal glycoprotein activates the alternative complement pathway by reacting with factor H.                                                                                                                                                                                                                                                                                                                                                                                                                                             | PMID: 6213029                 |
| CFH      |              | GBP5 promotes NLRP3 inflammasome assembly and immunity in mammals.                                                                                                                                                                                                                                                                                                                                                                                                                                                                                               | PMID: 22461501                |
| GBP5     |              | Repression of transcription by WT1-BASP1 requires the myristoylation of BASP1 and the PIP2-dependent recruitment of histone deacetylase./ apoptosis.                                                                                                                                                                                                                                                                                                                                                                                                             | PMID: 22939983                |
| BASP1    |              | TRIM proteins regulate autophagy: TRIM5 is a selective autophagy receptor mediating HIV-1 restriction and is a ubiquitin ligase that stimulates type I interferon & NFKB pathways with TRAF6.                                                                                                                                                                                                                                                                                                                                                                    | PMID: 25587751, PMID: 2650395 |
| TRIM22   |              | TRIM38 inhibits TNF $\alpha$ - and IL-1 $\beta$ -triggered NF- $\kappa$ B activation by mediating lysosome-dependent degradation of TAB2/3. TRIM38 negatively regulates TLR3-mediated IFN- $\beta$ signaling by targeting TRIF for degradation.                                                                                                                                                                                                                                                                                                                  | PMID: 24434549, PMID: 2305647 |
| TRIM5    |              | Interferon alpha induced. STAT2/IRF9 directs a prolonged ISGF3-like transcriptional response and antiviral activity in the absence of STAT1. Upon binding to dsRNA or dsDNA, OAS proteins and cGAS produce nucleotide second messengers to activate RNase L and STING (stimulator of interferon genes, gene symbol: TMEM173), respectively; this leads to the initiation of antiviral responses and interferon beta.                                                                                                                                             | PMID: 25564224, PMID: 2575260 |
| TRIM38   |              | C1 inhibitor                                                                                                                                                                                                                                                                                                                                                                                                                                                                                                                                                     | PMID: 22576004                |
| OAS2     | clorf29      | Induced by IFNalpha, downregulated by HIV, HIV-1 Vpr induces interferon-stimulated genes in human monocyte-derived macrophages.                                                                                                                                                                                                                                                                                                                                                                                                                                  | PMID: 25170834                |
| SERPING1 |              | IRF8 directs stress-induced autophagy in macrophages and promotes clearance of Listeria monocytogenes. IFN Regulatory Factor 8 Represses GM-CSF Expression in T Cells To Affect Myeloid Cell Lineage Differentiation. Negatively regulates plasma cells. Mendelian myco bacteria susceptibility                                                                                                                                                                                                                                                                  | PMID: 25398936, PMID: 2577503 |
| IF444L   |              | Syntaxin11 serves as a t-SNARE for the fusion of lytic granules in human cytotoxic T lymphocytes, Syntaxin-11, but not syntaxin-2 or syntaxin-4, is required for platelet secretion and NK cell de granulation.                                                                                                                                                                                                                                                                                                                                                  | PMID: 24227526, PMID: 2276750 |
| IRF8     |              | The nuclear receptor nr4a1 controls CD8 T cell development through transcriptional suppression of Runx3. Runt-related transcription factor 3 is involved in the altered phenotype and function in ThP $\delta$ -deficient invariant natural killer T cells.                                                                                                                                                                                                                                                                                                      | PMID: 25762306, PMID: 2456145 |
| STX11    |              |                                                                                                                                                                                                                                                                                                                                                                                                                                                                                                                                                                  |                               |
| RUNX3    |              |                                                                                                                                                                                                                                                                                                                                                                                                                                                                                                                                                                  |                               |

|           |                |                                                                                                                                                                                                                                                                                                                                                                                                       |                                |
|-----------|----------------|-------------------------------------------------------------------------------------------------------------------------------------------------------------------------------------------------------------------------------------------------------------------------------------------------------------------------------------------------------------------------------------------------------|--------------------------------|
| SH2D1A    |                | SLAM-SAP signaling promotes differentiation of IL-17-producing T cells and progression of experimental autoimmune encephalomyelitis.                                                                                                                                                                                                                                                                  | PMID: 25362182                 |
| RASSF5    |                | RASSF5 plays an important role in mediating apoptosis in response to death receptor ligands, TNF- $\alpha$ and TNF-related apoptosis-inducing ligand.                                                                                                                                                                                                                                                 | PMID: 20810663                 |
| ARL4C     | ARL7           | membrane.                                                                                                                                                                                                                                                                                                                                                                                             | PMID: 21187453                 |
| ZNF222    |                |                                                                                                                                                                                                                                                                                                                                                                                                       | PMID: 25236797                 |
| PPP1R18   |                | Phostensin was abundant in helper T-lymphocytes, cytotoxic T-lymphocytes, mature monocytes, macrophages, B-lymphocytes, natural killer cells, and granulocytes.                                                                                                                                                                                                                                       | PMID: 21804078                 |
| PIK3R5    |                | Phostensin binds to the pointed ends of actin filaments and modulates actin dynamics.                                                                                                                                                                                                                                                                                                                 | PMID: 23024273                 |
| SELL      | CD62L          | Involved in IL23R/IL17 production.                                                                                                                                                                                                                                                                                                                                                                    | PMID: 25715355, PMID: 24132160 |
| CD53      |                | Marker in t cell colitis transfer model and adoptive therapy for Crohn's.                                                                                                                                                                                                                                                                                                                             |                                |
| BIN2      |                | Combined use of biomarkers for distinguishing between bacterial and viral etiologies in pediatric lower respiratory tract infections.                                                                                                                                                                                                                                                                 | PMID: 25712729 , PMID: 2357094 |
| BCL2A1    |                | Characterization of tetraspanins CD9, CD53, CD63, and CD81 in monocytes and macrophages in HIV-1 .                                                                                                                                                                                                                                                                                                    |                                |
| TNFRSF13B | BAFF           | Cell motility, adhesion and phagocytosis are controlled by actin and membrane remodelling processes.                                                                                                                                                                                                                                                                                                  | PMID: 24867259                 |
| SRGN      | PPG, PRG, PRG1 | p53, nutlin-3-activated ERK1/2 may stimulate the transcription of BCL2A1 via the activation of ELK1, and BCL2A1 expression may contribute to the inhibitory effect of ERK1/2 on nutlin-3-induced apoptosis, thereby constituting a negative feedback loop of p53-induced apoptosis.                                                                                                                   | PMID: 24814046                 |
| CMKLR1    |                | Methylation of TNFRSF13B and TNFRSF13C in duodenal mucosa in canine inflammatory bowel disease and its association with decreased mucosal IgA expression.                                                                                                                                                                                                                                             | PMID: 24475103                 |
| SAMSN1    | Hacs1          | Pro apoptosis in DCs.                                                                                                                                                                                                                                                                                                                                                                                 | PMID: 26265756                 |
| GBP1      |                | Levels are associated with DSS colitis.                                                                                                                                                                                                                                                                                                                                                               | PMID: 21859567, PMID: 1992344  |
| LINC00847 |                | SH3 and SAM domain-containing adaptor protein, is up-regulated by IL-4 in activated B cells and strongly expressed in dendritic cells.                                                                                                                                                                                                                                                                | PMID: 24337748                 |
| RTN1      |                | Downstream of interferon gamma. Activates T cells.                                                                                                                                                                                                                                                                                                                                                    |                                |
| LAIR1     |                | ER localization and retention. Interacts with HDAC enzymes.                                                                                                                                                                                                                                                                                                                                           | PMID: 17303085, PMID: 2000048  |
| DTNB      |                | Inhibitory immuno receptor (esp in b cells).                                                                                                                                                                                                                                                                                                                                                          | PMID: 24694245, PMID: 1455924  |
| PPT1      |                | Dystrobrevin, scaffold in nucleolus.                                                                                                                                                                                                                                                                                                                                                                  | PMID: 25959029                 |
|           |                | Identification of palmitoyl protein thioesterase 1 in human THP1 monocytes and macrophages.                                                                                                                                                                                                                                                                                                           | PMID: 24083319                 |
| CYBB      | CGD/NOX2       | Chronic granulomatous disease (CGD) is a primary immunodeficiency disease that is characterized by susceptibility to bacterial and fungal infections. Various mutations in CYBB encoding the gp91(phox) subunit of the phagocyte nicotinamide adenine dinucleotide phosphate (NADPH) oxidase impair the respiratory burst of all types of phagocytic cells disrupting the response to IFN- $\gamma$ . | PMID: 25752509, PMID: 2530178  |
| NOD2      |                | Crohn's gene, MDP sensor                                                                                                                                                                                                                                                                                                                                                                              | PMID: 11385577                 |
| TIFAB     |                | Negative regulator of TRAF6.                                                                                                                                                                                                                                                                                                                                                                          | PMID: 19470519                 |
| MMP12     |                | Macrophage metalloelastase (MMP12) regulates adipose tissue expansion, insulin sensitivity, and expression of inducible nitric oxide synthase in M2 macrophages.                                                                                                                                                                                                                                      | PMID: 24914938                 |
| ADCY7     |                | Macrophages in ADCY7 knock downs produce more TNFa in response to LPS. ADCY7 also affects memory T cells and antibody responses.                                                                                                                                                                                                                                                                      | PMID: 23229509 , PMID: 1555039 |

**Table S10: Functional Categories of Genes in TRIM22 Sub network**

| Functional Categories from NOD2 from TRIM22 vortex:                                 | Correlation within each category (induced by, repressed by pathway signalling or directly modulates)                                                                                                                                                   |
|-------------------------------------------------------------------------------------|--------------------------------------------------------------------------------------------------------------------------------------------------------------------------------------------------------------------------------------------------------|
| Monocyte, Macrophage                                                                | ADAR1, CSF2RA, CXCL9, CECR1, PPT1, MMP12, GMFG, ITGB2, SPI1, SLAMF8, IL27RA, PTGES, CSF3R, PTAFR, CD300A, FGR, SLAMF7                                                                                                                                  |
| Neutrophil                                                                          | EMR2, LILRA5, FCGR3A, GPNMB, HCK, CXCL10, IL10RA, IFI44L, PPP1R18, CD53, TGFB, ADCY7, PLXNC1                                                                                                                                                           |
| DCs                                                                                 | CXCL5, CEBPB, GMFG, CXCL6, FGR, EMR2, TGFB                                                                                                                                                                                                             |
| T effector                                                                          | CXCL9, SPIB, S1PR4, ITGB2, CLEC4A, KYNU (tolerance), IGSF6, BATF2, CXCL10, IL10RA, SDC3                                                                                                                                                                |
| CD4                                                                                 | CSF2RA, ICOS, FAM65B, CD40LG, SPIB, GMFG, RUNX3 (suppression to induce IELs), CDC42SE1, MAP3K8, SELL                                                                                                                                                   |
| CD8/NK                                                                              | CLEC1A, GZMB, CLEC1A, STX11, RUNX3                                                                                                                                                                                                                     |
| TI17                                                                                | PIK3R5, ARID5A, MAP3K8, SH2D1A, CXCL6, CLEC7A, IL411, SH2D1A                                                                                                                                                                                           |
| T regulatory                                                                        | SOC51, IL411, CTLA4, CD274                                                                                                                                                                                                                             |
| CD4                                                                                 | PDCD1LG2, CLEC7A, IL27RA, IL2RA, IL10R, DTX1, PPP1R18, TGFB                                                                                                                                                                                            |
| CD8                                                                                 | LILRB4, IL27RA                                                                                                                                                                                                                                         |
| B                                                                                   | LAIR1, NFAM1, SPIB, DOK3, IL27RA, IFI30, PPP1R18, ELK2AP                                                                                                                                                                                               |
| Cytoskeleton (migration & phagocytosis/ immunological synapse/ mechanics migration) | CDC42SE1, GBP1P1, PPP1R18, BIN2                                                                                                                                                                                                                        |
| Endosomal                                                                           | FPR3, CXCR6 (ILC), FAM65B, CXCL9, MMP25, GPSM3, PLXNC1, AKAP11, GMFG, LIMS3                                                                                                                                                                            |
| Complement                                                                          | SLC15A3, DNAJC5B, SNX10                                                                                                                                                                                                                                |
| Tissue re-modelling/ thrombins                                                      | C1S, CFP, CFH, SERPING1                                                                                                                                                                                                                                |
| E2/E3 ligase, ubiquitin pathway                                                     | FPR3, MMP19, COL1A1, TIMP1, F2R                                                                                                                                                                                                                        |
| Inflammasome                                                                        | SENP7, ASB2, UBE2E2, FBXO6, UBE2D1, PDE4B, DTX1                                                                                                                                                                                                        |
| Autophagy                                                                           | GPSM3, MNDA, inflammasome (apoptosis), DYSF, GFH1, GBP5                                                                                                                                                                                                |
| Lysosomal                                                                           | LAP3, DRAM1, TRIM5                                                                                                                                                                                                                                     |
| Platelets                                                                           | LYST, GPNMB                                                                                                                                                                                                                                            |
| Viral infection and response (interferon inducible)                                 | STX11                                                                                                                                                                                                                                                  |
| NFKB/TNF $\alpha$ / apoptosis                                                       | CECR1, MX2, PML, PARP9, CD40, DOK3, BST2, ACP5, PSTPIP2, PTGES, CLEC4A, GBP4, IRF1, GBP1P1, MSANTD3, STAT1, PML, BATI                                                                                                                                  |
| ROS/NADPH/ phagosome                                                                | APOL1, IL15RA, IFI30, OAS2, IFI44L, SDC3                                                                                                                                                                                                               |
| Mycobacteria response (NOD2/IFN synergy (part viral))                               | LRRC33, NFAM1, TIFAB, GZMB, CYBB, DRAM1, TIFA, TNFRSF6B, BST2, TNFAIP2, NCF2, PTGES, PTAFR, BID (TNF $\alpha$ only, SLAMF7), EMILIN2 (apoptosis), IRF1 (TNF $\alpha$ induced), PLEK, APOL1, SLC2A3, TRIM38, RASSF5, DNASE, APOL2/ BASP1, ADCY7, UBE2D1 |
| P53 (same as Trim22)                                                                | CYBB, CYBA, HV1, SLAMF8, NCF2, FGR, NCF4, IFI30                                                                                                                                                                                                        |
| Prostaglandin/arachadonic acid                                                      | SLC15A3, STAT1, CXCL10, IL15RA, NCF4                                                                                                                                                                                                                   |
| Antigen Presentation/ MHC                                                           | NCF2, ARHGAP30                                                                                                                                                                                                                                         |
| Miscellaneous Inflammatory (adhesion)/signalling/muscle Activation                  | PLA2G7, TBXAS1                                                                                                                                                                                                                                         |
| Cell cycle/ prolif                                                                  | CITA, RFX5, LILRB2, CD1E, SCIMP                                                                                                                                                                                                                        |
| Metabolic/lipids                                                                    | GNAI2, CD18, PLA2G4F, CHST2, DTNB, ST3GAL5, GM2A, GNB4, SDC3, PLEKHO2, LIMS3L/ ZYX/ DYSF                                                                                                                                                               |
| Misc (biochem)                                                                      | CD86, CD40                                                                                                                                                                                                                                             |
| IEC/ enteroendocrine                                                                | CECR1, KDM2B, CENPV, MRAS                                                                                                                                                                                                                              |
| ER                                                                                  | APOC1, APOC1P1, APOE, CCDC71L, VPS13C, KCNAB2, FAH, SLC43A3, NNMT, CP, ARL4C, SLC2A6, APOL4                                                                                                                                                            |
|                                                                                     | FTSDJ2, NAPS, GNGT2, ZNF222                                                                                                                                                                                                                            |
|                                                                                     | SLC39A4, SPIB, ITPRIP                                                                                                                                                                                                                                  |
|                                                                                     | RTN1                                                                                                                                                                                                                                                   |



**Table S11: Adult and VEO IBD Network Predicted Key Drivers**

| Adult Key Drivers | Overlap of Adult IBD Key Drivers in 179 gene TRIM22 Subnetwork |
|-------------------|----------------------------------------------------------------|
| CYYR1             | TRIM22                                                         |
| ZNF521            | EMR2                                                           |
| INSR              | CLEC7A                                                         |
| GLCCI1            | CYBB                                                           |
| CREB5             | CEBPB                                                          |
| ASAP1             | IL10RA                                                         |
| LOC100132891      | ITGB2                                                          |
| HIP1              | TNFSF13B                                                       |
| ST3GAL1           | UBE2E2                                                         |
| DOCK8             | DNASE2                                                         |
| TRIM22            | GBP4                                                           |
| EMR2              | LAP3                                                           |
| C1R               | PLXNC1                                                         |
| MMP14             | CLEC4A                                                         |
| PMAIP1            | GZMB                                                           |
| KIF26B            | CXCL9                                                          |
| IL8               | RUNX3                                                          |
| BTN2A2            | MMP19                                                          |
| FPR2              | CD86                                                           |
| LOC100505687      | FGR                                                            |
| PDE4A             | TIFA                                                           |
| LDHB              | KYNU                                                           |
| KLHDC7B           | NFAM1                                                          |
| OAS2              | PPP1R18                                                        |
| COL1A1            | CXCL6                                                          |
| NCF1C             | STX11                                                          |
| DARC              | MRAS                                                           |
| TMTC1             | SERPING1                                                       |
| HLA-DPA1          | CD53                                                           |
| GJD3              | SAMSN1                                                         |
| SLAMF8            | CTLA4                                                          |
| CCR1              | TLR8                                                           |
| C9orf91           | DYSF                                                           |
| CRLF3             | DRAM1                                                          |
| TNS1              | STAT1                                                          |
| CDK14             | IGSF6                                                          |
| CYBB              | GBP1                                                           |
| IL13RA2           | CCDC71L                                                        |
| CXCL10            | MX2                                                            |
| RAMP2             | RASSF5                                                         |
| FSCN1             | BID                                                            |
| FCN3              | GMFG                                                           |
| SELE              | OAS2                                                           |
| ITGAM             | COL1A1                                                         |

|            |         |
|------------|---------|
| ME1        | SLAMF8  |
| ABLIM3     | CXCL10  |
| CD37       | TNFAIP2 |
| FNDC3B     | BCL2A1  |
| CSGALNACT2 | PLA2G7  |
| INHBA      | NCF2    |
| PHACTR1    | SOCS1   |
| EMR1       | SLC2A6  |
| PPM1F      | SELL    |
| ASPHD2     | LAIR1   |
| S1PR3      | CXCL5   |
| WNT5A      | ST3GAL5 |
| SFRP2      | LILRB4  |
| VWF        | ICOS    |
| TNFAIP2    | GM2A    |
| SMARCB1    | MNDA    |
| FBN1       | CSF2RA  |
| CNN2       | BASP1   |
| MAFB       |         |
| BCL2A1     |         |
| MAPK1      |         |
| BST2       |         |
| IL10RA     |         |
| IFI44      |         |
| ARHGAP15   |         |
| GRHL1      |         |
| C17orf96   |         |
| CDC42BPG   |         |
| GPX8       |         |
| STEAP4     |         |
| TPP1       |         |
| TRPM6      |         |
| GIMAP7     |         |
| PIP4K2A    |         |
| FLJ43663   |         |
| PIK3R3     |         |
| HERC5      |         |
| ENTPD1     |         |
| ITGB2      |         |
| ADAMTS2    |         |
| DUSP10     |         |
| GPRIN2     |         |
| ADAM19     |         |
| TNFSF13B   |         |
| MLKL       |         |
| GAS7       |         |

COL5A1  
HCK  
WHAMMP2  
IL23A  
OSMR  
PLA2G7  
FCGR2A  
ITGA4  
SLC7A11  
FLI1  
C4orf32  
TREM1  
HTRA1  
NFKBIA  
CDX2  
NPEPL1  
NCF2  
CCL8  
FPR1  
UBE2E2  
CD80  
CD300LF  
RNF166  
GAD1  
GCA  
THBS2  
IL6  
PKHD1L1  
SOCS1  
ADAMTS5  
ERG  
LOC100506941  
IL1R1  
GIMAP2  
LAP3  
SNX20  
TBL1X  
ST8SIA4  
PLXNC1  
DOCK2  
GABBR1  
EBI3  
SLC22A15  
CLYBL  
ADAMTS1  
TBC1D9

CCL11  
PTGS1  
CLEC4A  
PFKFB3  
GPR4  
HSD11B1  
PEA15  
HSH2D  
RBPMS  
TNFSF4  
ANKRD44  
LCP2  
LAMP3  
AGTRAP  
ARHGAP20  
CH25H  
SLC6A14  
IL12RB1  
MCAM  
GLUL  
IER3  
TLR2  
TGIF2  
RGS1  
EGFL6  
SLC2A6  
CXCL9  
UCP2  
RUNX3  
GAS1  
IL1B  
SLC9B2  
ZNF618  
CXCL11  
IL1RAP  
BICC1  
PDZK1IP1  
SEMA4A  
FCGR1A  
CTGF  
KMO  
CLIC2  
RHOQ  
CAV1  
TICAM2  
TNFAIP6

SELP  
SOCS3  
SLC16A6  
RGS5  
IFITM2  
SELL  
IFITM1  
IL11  
LAIR1  
CD86  
CYP27B1  
C1orf162  
LSP1  
SLC25A23  
EVI2B  
FKBP11  
TSPAN2  
DENND3  
AKT3  
TIFA  
GPR68  
FCGR2B  
FYB  
ARMCX1  
PIK3CD  
KYNU  
RAPGEF6  
IL33  
CACNA2D1  
SLC1A3  
TNF  
ITPR1  
CCL18  
CXCL5  
CXCL1  
ST3GAL5  
GPR183  
CHI3L1  
TMEM154  
NINJ2  
HLA-DOB  
GJA5  
FCHSD2  
ORAI2  
F5  
NPL

PRDM1  
KCNJ15  
CCDC3  
CHRDL2  
TPST1  
LAMC1  
TYROBP  
ZNF331  
SLC9A1  
MXRA5  
CXCL6  
GZMK  
COL5A2  
CLIP4  
DOCK10  
LIX1L  
MIR155  
IGDCC4  
LILRB4  
GJA1  
ROBO4  
DENND5A  
CKAP2  
LHFP  
IL18R1  
PEAR1  
MRAS  
SERPING1  
ARHGAP39  
IFITM3  
CFI  
TDO2  
EDNRA  
CD53  
EHD3  
CXCR2  
ABCA1  
KIAA1199  
CDH11  
EOMES  
S100B  
IL1RN  
RASA3  
PAPLN  
SLFN11  
ST6GAL1

SAMSN1  
CYP26B1  
STC1  
CD180  
ICOS  
MLK7-AS1  
CTLA4  
C13orf44-AS1  
CD79A  
LAMP5  
WNK3  
GM2A  
IDO1  
FAM20A  
LOC648987  
DISC1  
FAM110B  
ANKRD55  
TSHZ2  
TWIST2  
DDR2  
LRRK2  
STAT1  
IGSF6  
PPM1M  
SLC2A14  
RILPL2  
SASH3  
IRS1  
GBP1  
CCDC71L  
MMP3  
PDE10A  
COL15A1  
LINC00152  
TTC7B  
MX2  
SCRN1  
ITGAX  
SCUBE2  
LAIR2  
IL4I1  
CD300C  
TSPAN4  
FCER1G  
RASSF5

GBP2  
MNDA  
CD109  
BID  
CSF2RA  
B9D1  
CHST15  
GMFG  
ACSL4  
RGS10  
CLIC4  
VNN2  
LITAF  
PECAM1  
GPR176  
COL1A2  
LPAR6  
LY96  
VEGFC  
NOS2  
CD84  
EMID1  
CLIC6  
TRIB2  
CTSK  
PDPN  
TMEM45A  
HAVCR2  
CLEC7A  
MCL1  
PTPN11  
CTHRC1  
RNF24  
AKAP1  
DUOXA2  
MAT2A  
LST1  
NR4A3  
CXCR1  
CEBPB  
CCL4  
APCDD1  
IRAK3  
CD48  
DUOX2  
ALOX5AP



MMP1  
QPCT  
HAPLN3  
ZEB1  
TBC1D4  
TNFSF11  
RHOH  
MS4A1  
SNN  
FGF7  
SULF1  
GPR116  
PRNP  
SERPINE1  
KRT23  
OLFML2B  
TRDV3  
DAZAP2  
SERPINI1  
PXDN  
DNASE2  
IL7R  
C12orf5  
ESAM  
WISP1  
ACSL1  
WBP5  
GBP4  
TESC  
CCL3  
RASSF2  
SLC15A3  
DUSP6  
COL4A1  
C4BPB  
FCRL1  
CCL2  
LOC100129518  
GZMB  
CLEC4D  
SERPINB5  
SEMA4D  
KLRF1  
JAZF1  
ZNF277  
CYSLTR1

LIN7A  
CD83  
LOC100652805  
MMP19  
EVI2A  
TRERF1  
GNA12  
FGR  
IPCEF1  
SPP1  
C5AR1  
CEP170  
SAMD3  
LMBR1  
SALL1  
MMP10  
ATP6AP2  
KIRREL  
NFAM1  
JAK3  
GZMH  
CFP  
CMTM2  
COG1  
PPP1R18  
ADRBK2  
STX11  
SELT  
FAM26F  
RHOA  
RAB8B  
TANK  
SLC28A2  
GIMAP1-GIMAP5  
STEAP1B  
MYEOV  
ZG16  
AIDA  
VNN3  
C13orf44  
IGHA1  
TLR8  
DYSF  
IFIT1  
BASP1  
KCNJ10

SUPPLEMENTAL MATERIALS FOR:

**Variants in *TRIM22* that Affect NOD2 Signaling Are Associated With Very Early Onset Inflammatory Bowel Disease**

Qi Li<sup>1,2,§,\*</sup>, Cheng Hiang Lee<sup>3,4,§,\*</sup>, Lauren A Peters<sup>5,6,\*</sup>, Lucas A Mastropaolo<sup>2,§,#</sup>, Cornelia Thoeni<sup>1,2,§,#</sup>, Abdul Elkadri<sup>1,2,7,#,§</sup>, Tobias Schwerd<sup>8,#</sup>, Jun Zhu<sup>6</sup>, Bin Zhang<sup>6</sup>, Yongzhong Zhao<sup>6</sup>, Ke Hao<sup>6</sup>, Antonio Dinarzo<sup>6</sup>, Gabriel Hoffman<sup>6</sup>, Brian A Kidd<sup>6</sup>, Ryan Murchie<sup>1,2,§</sup>, Ziad Al Adham<sup>1,2,7,§</sup>, Conghui Guo<sup>2,§\*</sup>, Daniel Kotlarz<sup>9</sup>, Ernest Cutz<sup>10</sup>, Thomas D Walters<sup>1,2,§</sup>, Dror S Shouval<sup>11,§</sup>, Mark Curran<sup>12</sup>, Radu Dobrin<sup>12</sup>, Carrie Brodmerkel<sup>12</sup>, Scott B Snapper<sup>11,13</sup>, Christoph Klein<sup>9</sup>, John H Brumell<sup>1,7,14§</sup>, Mingjing Hu<sup>3,4</sup>, Ralph Nanan<sup>3,4</sup>, Brigitte Snanter-Nanan<sup>3,4</sup>, Melanie Wong<sup>15</sup>, Françoise Le Deist<sup>16</sup>, Elie Haddad<sup>17</sup>, Chaim M Roifman<sup>18</sup>, Colette Deslandres<sup>19</sup>, Anne M Griffiths<sup>1,2,§</sup>, Kevin J Gaskin<sup>3,4</sup>, Holm H Uhlig<sup>8</sup>, Eric E Schadt<sup>6,%</sup>, Aleixo M Muişe<sup>1,2,7,§,% ^</sup>

---

---

## **Table of Contents**

### **Methods**

#### **Detailed Case Reports:**

Family 1  
Family 2  
Family 3

#### **Supplemental Tables**

**Table S1:** Clinical (A) and Genetic Features (B) of Patients with *TRIM22*

**Table S2:** Autosomal Recessive Variants Identified by WES in Patient 1.

**Table S3:** VEOIBD Genes  
See excel sheet

**Table S4.** VEOIBD Key Drivers  
See excel sheet

**Table S5.** IIBDGC GWAS Enrichment in *TRIM22* Locus  
See excel sheet.

**Table S6.** IIBDGC GWAS Enrichment in *TRIM22* eQTL Enrichment  
See excel sheet

**Table S7.** eQTL Pathway Enrichment  
See excel sheet

**Table S8.** Crohn's GWAS Enriched Blood eQTL Overlap with the VEO Network

**Table S9.** Annotation of 179 VEO Network  
See excel sheet

**Table S10.** Functional Categories of Genes in the *TRIM22* Sub network

**Table S11.** Inflamed Sigmoid and Rectum Key Drivers

**Table S12.** Correlations of the Expression of *TRIM22* to the Clinical Response Characteristics Stratified by Distinct Intestine Anatomy Sites

**Table S13.** Correlation of the Expression of *TRIM22* in blood to CDAI

## Supplemental Figures

**Figure S1:** Variants Identified in WES of Patient 1.

**Figure S2:** Heterozygous TRIM22 Variants R150T and S244L Occur in the Coiled-coil Domain and May Affect Domain Oligomerization.

**Figure S3:** Blood and Intestine Derived eQTLs:  
Gene Set Enrichment Analysis of Genes Controlled by IBD SNPs (Metacore)

**Figure S4:** Computational Design

**Figure S5:** First Neighbors of TRIM22 and NOD2 in VEOIBD Intestine Network

**Figure S6:** TRIM22 and NOD2 Co-localize in Healthy Controls and Disrupted in Patient Tissue Sections.

**Figure S7:** TRIM22 Variants and shRNA Abrogate NOD2 signaling.

**Figure S8:** TRIM22 shRNA Knockdown.

**Figure S9:** TRIM22 Abrogates NOD2 Signaling in Patient 2 with Coiled-Coil Variants.

**Figure S10:** TRIM22 Directly Mediates the Polyubiquitination of NOD2 but not MAVS or RIPK2.

**Figure S11:** TRIM22 does not Mediate K48-linked Polyubiquitination of NOD2.

## References

## **Methods**

**Subjects:** All experiments were carried out with the approval of the Research Ethics Board (REB) at the Hospital for Sick Children. Informed consent to participate in research was obtained. A copy of the consent is available on the interNational Early Onset Pediatric IBD Cohort Study (NEOPICS) website at [http://www.neopics.org/NEOPICS\\_Documents.html](http://www.neopics.org/NEOPICS_Documents.html).

## **Genetics**

**Whole exome sequencing:** For patient 1 and her parents (trio), whole exome sequencing (WES) was performed using the Agilent SureSelect Human All Exon 50Mb kit with high-throughput sequencing conducted using the SOLiD 4 System at The Center for Applied Genomics (TCAG) through the Hospital for Sick Children (Toronto, ON). Sanger sequencing was used to verify variant genotypes in the Family 1 and infantile patients from the collaborating institutions were screened for *TRIM22* variants.

**Analysis:** Whole exome sequencing of Patient 1 and her parents resulted in greater than 100 times mean exome coverage and identified 152,020 variants. Using SNP and Variation Suite Version 8.1 (Golden Helix), variant call files (VCF) were organized by the family pedigree. Using the 1000 genomes Variant Frequencies (Phase 1) and the NHLBI Exome Sequencing Project V2 Exome Variant Frequencies, rare variants with a minor allele frequency below 1% were filtered. This resulted in 16,097 rare variants. Variants were then selected based upon whether they were deemed to be coding. From this list, we then identified 12 non-synonymous homozygous variants (Table S2) that were inherited in an autosomal recessive manner. Non-synonymous and unclassified variants were then scored using the database for non-synonymous functional predictions (dbNSFP 2.9), filtering out variants found to have no damaging score (Polyphen2, SIFT, MutationTaster, MutationAssessor, FATHMM). As well, variants were scored using PhyloP and GERP++ to determine conservation (Figure S1). Based on known protein function, expression profiles, animal models, mutation conservation, and network analysis, this list was narrowed down to a single candidate variant in *TRIM22*.

**Validation:** In order to validate these findings, we examined WES results from 150 infantile international VEOIBD patients without a genetic diagnosis who were previously sequenced in Toronto (NEOPICS), Oxford, and Munich (Care-For-Rare) and did not identify predicted damaging variants in the *TRIM22* gene. Therefore, we performed targeted exome sequencing of the *TRIM22* gene in ten *IL10RA/B*, and *IL10* negative patients without previous WES, and identified two additional patients with *TRIM22* variants (Patients 2 and 3) with a very similar severe phenotype of granulomatous colitis and severe perianal disease.

## **Computational Analysis**

**Dataset:** Blood and biopsy data was collected at baseline from anti-TNF resistant CD patients enrolled in the Ustekinumab trial previously described<sup>1</sup>. Two 2.5 mL blood samples were collected at the trial baseline using PAXgene tubes from all subjects (1528 blood samples in total). All blood samples were stored at -80°C until RNA isolation was performed. A subset of 150 blood samples was hybridized by microarray for genome-wide mRNA expression profiling. Ileal, rectal, and colonic biopsies were collected at the screening visits from a sub-group of

subjects who consented to this procedure. Biopsies were obtained from selected colonic sections, including the ascending, transverse, and descending colonic regions, and from both inflamed and non-involved areas. The inflamed regions were defined as the colonic segments with the most severe disease activity. Additional biopsies were collected from the terminal ileum and from the rectum (i.e., the distal 10 cm of the colon).

Total RNA including micro ribonucleic acids (miRNA) was isolated with PAXgene Blood RNA MDx Kit plus customized reagent BM3 (Qiagen Inc., Valencia, CA). RNA quantity and quality were determined with a LabChip GX (Caliper Life Sciences, Hopkinton, MA). Gene expression were carried out using Affymetrix GeneChip HTHGU133+ (Affymetrix, Santa Clara, CA, Cat# 901262) according to the manufacturer's protocol with the exception that DMSO replaced the Tetramethylammonium Chloride Solution (TMAC) in the hybridization buffer. Arrays were washed and stained on the Affymetrix GeneChip Array Station then scanned on an HTAPS scanner.

**Reconstruction of the Bayesian Networks:** Bayesian networks are directed acyclic graphs in which the edges of the graph are defined by conditional probabilities that characterize the distribution of states of each node given the state of its parents. The network topology defines a partitioned joint probability distribution over all nodes in a network, such that the probability distribution of states of a node depends only on the states of its parent nodes: formally, a joint probability distribution  $p(X)$  on a set of nodes  $X$  can be decomposed as  $p(X) = \prod_i p(X^i | \text{Pa}(X^i))$ , where  $\text{Pa}(X^i)$  represents the parent set of  $X^i$ . In our networks,

each node represents transcription expression of a gene. These conditional probabilities reflect not only relationships between genes, but also the stochastic nature of these relationships, as well as noise in the data used to reconstruct the network.

Bayes formula allows us to determine the likelihood of a network model  $M$  given observed data  $D$  as a function of our prior belief that the model is correct and the probability of the observed data given the model:  $P(M | D) \propto P(D | M) * P(M)$ . The number of possible network structures grows super-exponentially with the number of nodes, so an exhaustive search of all possible structures to find the one best supported by the data is not feasible, even for a relatively small number of nodes. We employed Monte Carlo Markov Chain (MCMC) <sup>2</sup> simulation to identify potentially thousands of different plausible networks, which are then combined to obtain a consensus network (see below). Each reconstruction begins with a null network. Small random changes are then made to the network by flipping, adding, or deleting individual edges, ultimately accepting those changes that lead to an overall improvement in the fit of the network to the data. We assess whether a change improves the network model using the Bayesian Information Criterion (BIC)<sup>3</sup>, which avoids over fitting by imposing a cost on the addition of new parameters. This is equivalent to imposing a lower prior probability  $P(M)$  on models with larger numbers of parameters.

Even through edges in Bayesian networks are directed, we can't infer causal relationships from the structure directly in general. For example, in a network with two nodes,  $X^1$  and  $X^2$ , the two models  $X^1 \rightarrow X^2$  and  $X^2 \rightarrow X^1$  have equal probability distributions as  $p(X^1, X^2) = p(X^2 | X^1) p(X^1) = p(X^1 | X^2) p(X^2)$ . Thus, by data itself, we can't infer whether  $X^1$

is causal to  $X^2$ , or vice versa. In a more general case, a network with three nodes,  $X^1$ ,  $X^2$ , and  $X^3$ , there are multiple groups of structures that are mathematically equivalent. For example, the following three different models,  $M1: X^1 \rightarrow X^2, X^2 \rightarrow X^3$ ,  $M2: X^2 \rightarrow X^1, X^2 \rightarrow X^3$ , and  $M3: X^2 \rightarrow X^1, X^3 \rightarrow X^2$ , are Markov equivalent (which means that they all encode for the same conditional independent relationships). In the above case, all three structures encode the same conditional independent relationship,  $X^1 \not\perp\!\!\!\perp X^3 \mid X^2$ ,  $X^1$  and  $X^3$  are independent conditioning on  $X^2$ , and they are mathematically equal.

$$\begin{aligned} p(X) &= p(M1 \mid D) = p(X^2 \mid X^1)p(X^1)p(X^3 \mid X^2) \\ &= p(M2 \mid D) = p(X^1 \mid X^2)p(X^2)p(X^3 \mid X^2) \quad . \\ &= p(M3 \mid D) = p(X^2 \mid X^3)p(X^3)p(X^1 \mid X^2) \end{aligned}$$

Thus, we can't infer whether  $X^1$  is causal to  $X^2$  or vice versa from these types of structures.

However, there is a class of structures, V-shape structure (eg.  $Mv: X^1 \rightarrow X^2, X^3 \rightarrow X^2$ ), which has no Markov equivalent structure. In this case, we can infer causal relationships. There are more parameters to estimate in the  $Mv$  model than  $M1$ ,  $M2$ , or  $M3$ , which means a large penalty in BIC score for the  $Mv$  model. In practice, a large sample size is needed to differentiate the  $Mv$  model from the  $M1$ ,  $M2$ , or  $M3$  models.

**Incorporating genetic data as a structure prior in the Bayesian network reconstruction process:** In general, Bayesian networks can only be solved to Markov equivalent structures, so that it is often not possible to determine the causal direction of a link between two nodes even through Bayesian networks are directed graphs. However, the Bayesian network reconstruction algorithm can take advantage of the experimental design by incorporating genetic data to break the symmetry among nodes in the network that lead to Markov equivalent structures, thereby providing a way to infer causal directions in the network in an unambiguous fashion<sup>4</sup>. We modified the reconstruction algorithm to incorporate eSNP data as priors as follows: genes with cis-eSNP<sup>5</sup> are allowed to be parent nodes of genes without cis-eSNPs, but genes without cis-eSNPs are not allowed to be parents of genes with cis-eSNPs,  $p(trans \rightarrow cis) = 0$ . We have shown that integrating genetic data such as cis-acting eSNP or eQTLs (excluding edges into certain nodes) improves the quality of the network reconstruction by simulations<sup>6</sup> and by experimental validations<sup>4, 7</sup>. We note that in applying this particular version of the Bayesian network reconstruction algorithm (incorporating genetic information as a prior), if genetic information is not available or is ignored, the population is simply treated as a population with random genetic perturbations.

**Averaging network models:** Searching optimal BN structures given a dataset is an NP-hard problem. We employed an MCMC method to do local search of optimal structures as described above. As the method is stochastic, the resulting structure will be different for each run. In our process, 1,000 BNs were reconstructed using different random seeds to start the stochastic reconstruction process. From the resulting set of 1,000 networks generated by this process, edges that appeared in greater than 30% of the networks were used to define a consensus network. A 30% cutoff threshold for edge inclusion was based on our simulation study<sup>6</sup>, where a 30% cutoff yields the best tradeoff between recall rate and precision. The consensus network resulting from



the averaging process may not be a BN (a directed acyclic graph). To ensure the consensus network structure is a directed acyclic graph, edges in this consensus network were removed if and only if (1) the edge was involved in a loop, and (2) the edge was the most weakly supported of all edges making up the loop.

**Bayesian network for individual co-expression module:** Searching optimal BN structures given a dataset is an NP-hard problem. The computational complexity of our MCMC method for described above is  $O(N^4)$ , where  $N$  is the number of nodes included in the network reconstruction process. It is practically impossible to construct a global Bayesian network including all 39,000 genes from the intestinal tissue. Following the procedure described above, 1,000 BNs were reconstructed using different random seeds to start the reconstruction process. From the resulting set of 1,000 networks generated by this process, edges that appeared in greater than 30% of the networks were used to define a consensus network. Our previous simulation study shows that the 30% inclusion threshold results in a stable structure and achieves the best tradeoff between precision and recall<sup>6</sup>. The histogram of percentage of occurrences of all potential edges shows that 30% is a reasonable cutoff threshold for inclusion (a typical histogram is shown in Figure here).



**Identification of Key Causal Regulators:** For each Bayesian network, we further identified the regulators by examining the number of N-hop downstream nodes (NHDN) for each gene in the directed network<sup>8</sup>. For a given network, let  $\mu$  be the numbers of N-hop downstream nodes and  $d$  be the out degrees for all the genes. The genes with the number of N-hop downstream nodes

(NHDN) greater than  $\bar{\mu} + \sigma(\mu)$  are nominated as causal regulators. The regulators with degree above  $\bar{d} + 2\sigma(d)$ , where  $d$  denote the number of downstream genes, become key causal regulators of a corresponding sub-network associated with disease status. These criteria identified genes with number of downstream nodes and number of out links significantly above the corresponding average value. This method was performed on the IBD RISK network to determine VEOIBD Key Causal Regulators.

**Weighted Gene Coexpression Network Analysis:** The weighted network analysis begins with a matrix of the Pearson correlations between all gene pairs, then converts the correlation matrix into an adjacency matrix using a power function  $f(x)=x^\beta$ . The parameter  $\beta$  of the power function is determined in such a way that the resulting adjacency matrix (i.e., the weighted co-expression network) is approximately scale-free. To measure how well a network satisfies a scale-free topology, we use the fitting index<sup>9</sup> (i.e., the model fitting index R<sup>2</sup> of the linear model that regresses  $\log(p(k))$  on  $\log(k)$  where  $k$  is connectivity and  $p(k)$  is the frequency distribution of connectivity). The fitting index of a perfect scale-free network is 1. For this dataset, we select the smallest  $\beta$  which leads to an approximately scale-free network. The distribution  $p(k)$  of the resulting network approximates a power law:  $p(k) \sim k^{-\gamma}$ .

To explore the modular structures of the co-expression network, the adjacency matrix is further transformed into a topological overlap matrix<sup>9</sup>. As the topological overlap between two genes reflects not only their direct interaction, but also their indirect interactions through all the other genes in the network, previous studies<sup>9, 10</sup> have shown that topological overlap leads to more cohesive and biologically meaningful modules. To identify modules of highly co-regulated genes, we used average linkage hierarchical clustering to group genes based on the topological overlap of their connectivity, followed by a dynamic cut-tree algorithm to dynamically cut clustering dendrogram branches into gene modules<sup>11</sup>. To distinguish between modules, each module was assigned a unique color identifier, with the remaining, poorly connected genes colored grey. To examine how each gene module was related to clinical traits we first performed principal component analysis for each module, and then computed module-trait correlation between the first principal component (module eigengene) and each trait<sup>12</sup>. The significance (p value) of each correlation was also calculated.

**Key Driver Analysis:** Key driver analysis (KDA) takes as input a set of genes ( $G$ ) and a directed gene network  $N$  (eg Bayesian network)<sup>12-15</sup>. The objective is to identify the key regulators for the gene sets with respect to the given network. KDA first generates a sub-network  $N_G$ , defined as the set of nodes in  $N$  that are no more than  $h$ -layers away from the nodes in  $G$ , and then searches the  $h$ -layer neighborhood ( $h=1, \dots, H$ ) for each gene in  $N_G$  ( $HLN_{g,h}$ ) for the optimal  $h^*$ , such that

$$ES_{h^*} = \max(ES_{h,g}) \forall g \in N_g, h \in \{1..H\}$$

where  $ES_{h,g}$  is the computed enrichment statistic for  $HLN_{g,h}$ .

A node becomes a candidate driver if its HLN is significantly enriched for the nodes in  $G$ . Candidate drivers without any parent node (i.e., root nodes in directed networks) are designated as global drivers and the remaining are local drivers.

**Key Driver Analysis was performed by projecting Inflamed Sigmoid and Inflamed Rectum signatures on the Bayesian Ileum network constructed from the ustekinumab trial data.**

**Differential Expression:** Whole-genome transcriptional expression data were collected from

biopsy tissue samples and whole blood of individuals in the Janssen ustekinumab trial (T26). We wanted to identify differential expression signatures of disease status, degree of tissue inflammation (inflamed versus non-involved).

### **Sample Selection and Data Curation**

**Biopsy data:** A total of 321 biopsy tissue samples were collected from 86 individuals (mean of 4 samples from differential anatomical regions of the terminal ileum, colon, and rectum per individual) at the screening time point of the study. Whole-genome expression data were collected on the Affymetrix ht\_hg-u133\_pm\_ap platform, which contains 54,715 probes (~21,000 genes). Pre-processing of expression data included background correction, log<sub>2</sub> transformation, quantile normalization, and Robust Multi-array Averaging to stabilize the variance and rescale the levels across arrays<sup>1</sup>. Further quality control measures of clustering and principal component analysis (PCA) were employed to identify potential outliers in the data. Age and gender adjustments to expression levels were performed on each tissue location using robust linear regression. Only samples with valid age and gender data were used for analysis.

**Blood data:** A total of 836 blood samples were collected from 275 individuals during the course of the trial. Whole-genome expression data were collected on the Affymetrix ht\_hg-u133\_pm\_ap platform, which contains 54,715 probes (21,000 genes). Pre-processing and quality control steps were similar to biopsy procedures listed above. Expression levels were adjusted by age, gender, and batch using robust linear regression. Only samples with valid age and gender data were used for analysis.

To identify differential expression signatures, we used an unbiased univariate filter to select top-varying genes and then applied significance analysis of microarrays (SAM)<sup>16</sup> to whole-genome expression data collected from biopsy tissue samples and whole blood of individuals in T26 trial. To control for multiple hypothesis testing, we used the Benjamini & Hochberg adjustment on the raw p-values to control the family-wise error rate, and set a false discovery rate threshold of 1% or 5%. All analyses performed using the R statistical package, version 2.15.24.1.

**Comparisons:** Biopsy – anatomical region and inflammatory signatures.

To ascertain tissue-specific signatures, we examined inflamed versus non-involved tissue from differential anatomical regions of the small intestine, colon, and rectum.

**Clinical variable correlation:** We used Spearman correlation to examine the relationship between the mRNA expression of TRIM22 in intestine and blood and several key IBD traits. The correlation test was performed with the R function “corr.test”. We applied a simple Bonferroni correction to a 0.01 significance level across all gene-trait correlation tests performed.

### **Functional Studies**

**Constructs:** HA-epitope tagged mammalian expression plasmids for NOD1 and NOD2 were obtained from Dr. Dana Philpott (University of Toronto), GFP-tagged Ubiquitin was obtained for Dr. John Brumell (University of Toronto), HA-tagged K48 Ubiquitin and HA-tagged K63 Ubiquitin were obtained for Dr. Jane McGlade (University of Toronto), FLAG-tagged MAVS and FLAG-tagged RIP2 were obtained for Dr. Hong-bing Shu (Wuhan University) and

mammalian expression plasmids for FLAG-tagged TRIM22 and its mutants were constructed by site-directed mutagenesis.

**Transfection and Luciferase Reporter Assays:** NF- $\kappa$ B luciferase reporter plasmids (Promega) and ISRE promoter and IFN $\beta$  promoter luciferase reporter plasmids were obtained from Dr. Hong-bing Shu (Wuhan University). A total of HEK 293 cells ( $1 \times 10^5$ ) were seeded on 24-well dishes and transfected the following day using Lipofectamine 2000 method. Empty control plasmid was added to ensure that each transfection received the same amount of total DNA. To normalize for transfection efficiency, 0.01 $\mu$ g of pRL-TK (Renilla luciferase) reporter plasmid was added to each transfection. Approximately 24h after transfection, luciferase assays were performed using a dual-specific luciferase assay kit (Promega). Firefly luciferase activities were normalized on the basis of Renilla luciferase activities. Cells were treated with recombinant TNF $\alpha$ , RSV, or L18-MDP (InvivoGen). Statistical analysis of luciferase assay data consisted of two-way ANOVA followed by Bonferroni post-hoc testing to compare across conditions. Statistical significance was assigned to tests with  $p < 0.05$  after Bonferroni correction.

**Quantitative real-time PCR:** Total RNA was isolated from cells using Trizol reagent (Ambion), reverse-transcribed in cDNA using Superscript VILO (Invitrogen), and subjected to qPCR analysis to measure mRNA expression levels of tested genes. Gene-specific primer sequences were as follow: *ISG15*: 5'-AATGGGCTGGGACCTGACGG-3' (forward), 5'-TTAGCTCCGCCCGCCAGGCT-3' (reverse); *IL-6*: 5'- CCT GAACCTTCCAAAGATGGC-3' (forward), 5'-TTCACCAGGCAA GTCTCCTCA-3' (reverse); *TNF*: 5'-GAGGCCAAGCCCTGGTATG-3' (forward), 5'-CGGGCCGATTGATCTCAG C-3' (reverse); *GAPDH*: 5'-GAGTCAACGGATTTGGTCGT-3' (forward), 5'-GACAAGCTTCCCCTTCTCAG-3' (reverse). Statistical analysis of qPCR data consisted of two-way ANOVA followed by Bonferroni post-hoc testing to compare across conditions. Statistical significance was assigned to tests with  $p < 0.05$  after Bonferroni correction.

**Coimmunoprecipitation and Immunoblot Analysis:** For transient transfection and coimmunoprecipitation experiments, HEK 293 cells ( $1 \times 10^6$ ) were seeded for 24 hr then transiently transfected for 18–24 hr using Lipofectamine 2000 according to the manufacturer's protocols. Transfected cells were lysed in 1 mL of lysis buffer (150mM NaCl, 50mM HEPES, 1% Triton X-100, 10% glycerol, 1.5mM MgCl<sub>2</sub>, 1.0mM EGTA) supplemented with protease and phosphatase inhibitors (aprotinin (1:1000), leupeptin (1:1000), pepsin (1:1000) and, PMSF (1:100). For each immunoprecipitation, a 0.9mL aliquot of the lysate was incubated with 0.5  $\mu$ g of the indicated antibody and 40  $\mu$ L of a 1:1 slurry of Protein G Sepharose (Bioshop) for 1 h. Sepharose beads were washed 3X with 1 mL of high salt lysis buffer containing 0.5 M NaCl. The precipitates were analyzed by standard immunoblot procedures using the following antibodies: mouse monoclonal anti-FLAG (Sigma), anti-HA (Origene), anti-NOD2 (Novus), anti-GFP (Invitrogen), rabbit polyclonal anti-TRIM22 (Abnova) and goat polyclonal anti-NOD2 (Ingenix). For endogenous coimmunoprecipitation experiments, HT29 cells ( $5 \times 10^7$ ) were stimulated with MDP (10 $\mu$ g/mL) for the indicated times or left untreated. The coimmunoprecipitation and immunoblot experiments were performed as described above.

**shRNA Transduced Stable HT29 cells:** shRNA targeted to TRIM22 was obtained from Dr. Barr's lab (University of Western Ontario). The HT29 cells were transfected with two packaging

plasmids, pMD2G and pSPA, and the GFP control or TRIM22 shRNA retroviral plasmid by calcium phosphate precipitation. Cells were washed 12 hr after transfection and new medium without antibiotics was added for 24 hr. The recombinant virus-containing medium was filtered and used to infect HT29 cells in the presence of polybrene (4µg/mL). The infected HT29 cells were selected using puromycin (2µg/mL) for 2 weeks before additional experiments were performed.

**Immunohistochemistry:** Colonic biopsies and tissues from colon resection specimen were fixed in 10% neutral buffered formalin and embedded in paraffin. Sections cut at 5 µm were placed on Superfrost Plus (Fisher Scientific, Waltham, MA) microscope slides. Following incubation at 60°C for 30 min, the tissues sections were deparaffinized and rehydrated using sequential washes (100% xylenes, 5 min x 2; 50% xylenes: 50% ethanol, 5 min; 100% ethanol, 5 min x 2; 95% ethanol, 3 min; 75% ethanol, 3 min; 50% ethanol, 3 min; cold H<sub>2</sub>O, 5 min). Sections were then stained with haematoxylin and eosin (H&E) for 10 min, followed by sequential washes in cold H<sub>2</sub>O. Stained tissue was mounted using xylene based mounting media. Stained sections were photographed with a Nikon Light Microscope and adjusted for brightness and contrast using Adobe Photoshop.

#### **Fluorescent Confocal Microscopy**

**Immunofluorescence on biopsy samples:** Paraffin sections were deparaffinized using xylene and rehydrated in ethanol at different concentrations. Antigen retrieval was performed using high pressure-cooking in EDTA buffer, pH 9. Afterwards tissue sections were blocked for 1 hr at RT with 5% BSA and 15% goat serum in 1X PBS without Ca<sup>2+</sup> and Mg<sup>2+</sup> to avoid nonspecific antibody binding. First antibody incubation was performed overnight at 4°C. Next day, sections were washed 3X for 10 min with 1X Ca<sup>2+</sup>, Mg<sup>2+</sup> free PBS. Tissue slides were incubated with secondary antibody for 1 hr in darkness at RT and afterwards washed 3X for 10 min with 1X PBS without Ca<sup>2+</sup> and Mg<sup>2+</sup>. Finally mounting of stained sections were performed overnight using Vectoshield Mounting Medium. Polyclonal rabbit anti-TRIM22 (Sigma Aldrich), monoclonal mouse anti-NOD2 (Novus Biologicals), polyclonal rabbit anti-Flag (Sigma Aldrich) and mouse monoclonal HA (Thermo Scientific) were used as first antibodies in a 1:100 dilution. ALEXA 488 goat anti-mouse and ALEXA 568 goat anti-rabbit were used as secondary antibodies at a dilution of 1:500. Nuclei were stained using Dapi (Thermo Scientific) in a dilution 1:10 000. Images of stained slides were taken on an Olympus Spinning disk confocal microscope and adjusted for brightness and contrast in the Velocity Software 6.1.1.

**Peptide inhibition of NOD2 in human biopsy samples:** NOD2 peptide (ab39813, Abcam) was incubated overnight at 4°C with the NOD2 antibody (ab36836, Abcam) in the following proportion: 10X peptide concentration to 1X antibody. Next day immunofluorescence analysis on biopsy samples was performed as described above.

**Immunofluorescence on HEK 293 cells:** Cells were fixed in 4% paraformaldehyde and permeabilized with 0.01% Triton-X-100 for 1 minute. Blocking was performed at RT for 1 hour and first antibody incubation overnight at 4°C. Afterwards cells were washed 3X for 10 minutes with 1X PBS without Ca<sup>2+</sup> and Mg<sup>2+</sup>. Next cells were incubated with secondary antibodies for 1 hr at RT in darkness, washed 3X for 10 minutes with 1X PBS without Ca<sup>2+</sup> and Mg<sup>2+</sup> and

finally mounted with Dako Fluorescent Mounting Medium (Dako). Nuclei counter-staining as well as first and secondary antibodies were the same as used for biopsy staining.

**Intracellular TNF staining and flow cytometry:** Peripheral blood mononuclear cells (PBMCs) were isolated by gradient centrifugation from whole blood from patient, parent or healthy donor. NOD2-dependent TNF response in monocytes was evaluated as previously described (please cite PMID 24611904). In brief, PBMCs were cultured overnight in RPMI1640 supplemented with 10% FCS. The following day, cells were gently washed with PBS and activated for 2.5 hours with 200 ng/ml L18-MDP (Invivogen) or 200 ng/mL LPS (Enzo) in the presence of Golgiplug (BD Bioscience). After stimulation, cells were harvested by scraping, put on ice and labelled with fixable viability dye (eBioscience) and surface monocyte markers. Following fixation and cell permeabilization (Cytofix/Cytoperm Kit, BD Bioscience) cells were stained for intracellular production of TNF. The following antibodies were used: anti-TNF (clone MAb11, eBioscience), anti-CD14 (clone M5E2) and anti-HLA-DR (clone L243, both BioLegend). Results were acquired by flow cytometry (LSRFortessa, BD Biosciences) and data analyzed with FlowJo software (Version 10.0.6, Treestar).

### **Detailed Case Reports – Patients 1 to 3**

**Patient 1:** Patient 1 was born at term with a birth weight of 3.8 kg to consanguineous parents of Lebanese descent. At 8 days old, she presented with fever, poor feeding, mouth ulcers, diarrhea, and perianal excoriation. Chest X-ray showed increase opacity over right upper zone, consistent with right upper lobe collapse. She was treated with empiric antibiotics and started on amino acid based formula for presume cow's milk protein allergy. During the next few months, she had recurrent fever, mouth ulcers and poor feeding.

At 7 months old, Patient 1 experienced severe pain associated with defecation and bloody diarrhea. She was later referred for investigation of possible VEOIBD. Clinical examination revealed multiple perianal skin tags and fissures. Colonoscopy showed active chronic proctitis with granuloma formation. She was treated with prednisolone leading to some symptomatic relief, however she later proved to be steroid dependent. Gastrostomy was inserted at 9 months to facilitate continuous feed in view of her significant growth failure.

Infliximab was started at 16 months old but she developed anaphylaxis after 2 doses. As her perianal disease deteriorated, she experienced very severe pain while defecating. In order to reduce fecal output and hence reduce the perianal symptoms, she was commenced on 6 months of total parenteral nutrition (TPN) with complete gut rest. She remained symptomatic despite these interventions.

Simultaneously, Patient 1 also had partial upper airway obstruction with non-granulomatous inflammatory polyps in the pharynx; these were removed surgically. After the upper airway obstruction was resolved, Adalimumab was introduced with no clinical improvement. Subsequently, her course was punctuated by multiple infections, even though screening tests for immunodeficiency were normal (discussed below).

At 25 months old, a diversion colostomy was performed to control her perianal disease. Initially there were marked improvements after fecal stream diversion and topical tacrolimus treatment. However she continued to have colitis and poor growth.

At 3 years old, she developed fistulae around her colostomy site. Due to persistent disease, she had sub-total colectomy and formation of end ileostomy at 4 years old.

At nearly 5 years old, Patient 1 had type-2 respiratory failure secondary to Coronavirus respiratory tract infection. Further investigation revealed that she had severe bronchiectasis, probably secondary to recurrent respiratory tract infection.

Presently, the combination of supplementary parental nutrition, fecal stream diversion and no immunosuppressive medication, Patient 1 has been relatively symptom free with appropriate growth.

She had numerous central venous access associated sepsis; *Candida parapsilosis*, *Enterobacter cloacae*, *Coagulase negative staphylococcus*, *Pseudomonas aeruginosa*, *Escherichia coli*, *Klebsiella oxytoca* were cultured in her blood. She also had multiple respiratory infections, microorganism isolated included *Respiratory syncytia virus*, *Influenza A*, *Coronavirus*, *Human*

*metapneumovirus*, and *Pseudomonas aeruginosa*. The majority of her infections of viral origin occurred within 48 hours post-Adalimumab injection.

Her immunological workup showed on multiple occasions with ongoing inflammation normal to mildly elevated IgG, IgM, IgE, and IgA. Immunophenotyping showed normal populations of CD3, CD4, CD8, CD4:CD8 ratio, CD19, and NK cells. There was normal expression of CD11b and CD18 compared to normal controls indicating no evidence of leukocyte Adhesion Deficiency Type 1. C3 and C4 levels were noted to be normal. The following antibodies were noted to be negative: Anti-dsDNA, Anti-Myeloperoxidase, Anti-PR3, and Anti-Nuclear Antibody. She was found to have C-Anti-Neutrophil Cytoplasmic Antibody positivity 1/80. NBT testing was normal on several occasions, and Neutrophil Oxidative Burst Index was found to be normal as well. Screening for Familial Mediterranean Fever was found to be negative. Functional studies demonstrated a normal TNF $\alpha$  response to L18-MDP stimulation (data not shown). Whole exome sequencing performed showed no variants within *NOD2*, *IKBK*, *XIAP* or other genes known to cause primary immunodeficiency or other genes known to cause colitis<sup>17</sup>.



**Patient 2:** Patient 2 was born premature at 35 weeks of gestation to non-consanguineous parents of Jamaican descent. There is a family history of Crohn's disease in his uncle. At 3 ½ months old, he presented with a fever and a rash and was found to have hypoalbuminemia and severe microcytic anemia (hemoglobin of 67 g/l, MVC 60). His septic workup was negative and he was treated with a change in his diet to a semi-hydrolyzed formula.

At 6 months of age, he presented with an acute lower GI bleed and was found to have a major coagulopathy, hypoalbuminemia and severe anemia (69 g/L). During this admission, he developed a perianal abscess on his left gluteal region that was surgically drained. He had multiple infections during this admission (*E. coli* urinary tract infection, Rotavirus and a positive urine culture for CMV). Colonoscopy found large ulcerations in the sigmoid and descending colon with multiple pseudopolypoid lesions and marked background inflammation with loss of vasculature. Biopsy pathology noted inflamed granulation tissue lined by histiocytes and fibrino-purulent exudate. His upper endoscopy was visually normal, but granulomas were noted on pathology of the stomach biopsies. He was started on an amino acid formula.

At 9 months old, he presented with polyarthritis and dactylitis. He continued to have severe anemia with elevated acute phase reactants. He was started on steroids and subsequently azathioprine for maintenance therapy.

At 13 months of age, he was admitted with a severe flare of his colitis and a severe drop of his hemoglobin to (39 g/L). Colonoscopy reconfirmed pancolitis. Biopsies showed noncaseating granulomata with changes of chronic colitis. Azathioprine was changed to methotrexate. He also was found to have a perianal abscess on his right buttocks that was drained surgically.

At 18 months, he presented with severe diarrhea resulting in metabolic acidosis requiring admission and rehydration. Prednisone was restarted.

At 20 months, his perianal disease worsened with the development of multiple fistulae. Infliximab was attempted at 4.2 mg/kg/dose.

At 23 months, his perianal disease worsened. Colonoscopy showed again pancolitis with serpiginous ulcers from rectum to proximal descending colon.

At 24 months, he continued to flare and his perianal disease worsened. He was noted to have a loss of response to Infliximab, and he underwent a left-sided colectomy with placement of a colostomy.

He presented again at 28 months with a further ischio-rectal abscess of the right buttock that was drained surgically.

At 38 months, he developed a large peri-colostomy abscess with a generalized worsening of disease. Infliximab was restarted, and he developed an allergic reaction after the second dose. He continued to worsen and subsequently required a right hemicolectomy with ileostomy formation.

Abscess continued to form for the next three years, requiring admission and drainage. Adalimumab was attempted with improvement of weight and symptoms.

As for extra-intestinal manifestations, he has had dactylitis and polyarthropathy since 9 months of age. These have improved on steroid therapy. He also developed orchitis and epididymitis requiring treatment with clavulin. He developed pyoderma gangrenosum near the site of ileostomy.

His initial immune workup noted a normal NBT test and Neutrophil Oxidative Burst Index (NOBI) and normal IgG, IgM and IgA level. Lymphocyte proliferation was noted to be normal. Immunophenotyping showed normal percentages of CD3, CD4, CD8, CD19, CD4:CD8 ratio and NK cells. He was negative for HLA-B27. The following autoantibodies were noted to be negative: Anti-Nuclear Antibody (ANA), Anti-Smooth Muscle Antibody (Anti-SMA), Anti-Parietal Cell Antibody, Anti-Cardiolipins IgM and IgG, and Rheumatoid Factor. *IL10*, *IL10RA* and *IL10RB* genes were sequenced and no mutations were identified, and STAT3 phosphorylation was noted to be normal after stimulation of PBMCs with IL-10. His most recent immunological work up showed a normal Neutrophil Oxidative Burst Index (NOBI) and a normal immunophenotyping analysis of lymphocytes. Functional studies demonstrated abnormal TNF $\alpha$  response to L18-MDP stimulation (Figure S8). Because of this abnormal MDP response, the patient had directed sequencing of XIAP on 4 separate occasions at 2 institutions and no disease causing mutations were identified.

**Patient 3:** Patient 3 presented at age 7 years with severe hypoalbuminemia, bloody diarrhea and weight loss of a few weeks duration. Previously she had an unremarkable medical history and was born to consanguineous parents. She had been unwell for approximately 1 year prior to presentation and found to have severe anemia requiring a transfusion and elevated acute phase reactants. She presented with pericarditis and was admitted to the ICU. After initiating steroids, she responded initially. Her prior medical history was unremarkable and included only reactive airway disease. There was a strong family history of Crohn's disease in both her mother and maternal aunt. Her initial colonoscopy was limited due to severity but showed continuous colitis with cobblestoning and friability. Pathology showed chronic inflammation of the colon with partial villous blunting of the duodenal villi.

She continued on steroids but continued to be steroid dependent despite azathioprine. She was noted to develop a rectovaginal fistula, along with perianal disease. Due to continued disease activity, perianal disease and steroid dependence, infliximab was initiated with no significant improvement. She had repeated endoscopic evaluation showed pseudopolyps and discontinuous disease of the colon. Her terminal ileum showed edema and her perianal disease required multiple interventions using Seton placement and skin graft surgery.

Due to continued disease and lack of response, she subsequently underwent diversion ileostomy, followed by total proctocolectomy and abdominal perineal resection. Pathology of the resected specimen noted granulomas and inflammation involving the terminal ileum. Subsequent biopsies from colonoscopies done after surgery have all shown granulomas and mild patchy chronic colitis. She was started on Adalimumab therapy.

Despite diversion and second line anti-TNF therapy, she continued to have perianal disease with partial response. She also developed iritis and erythema nodosum. At last follow-up, she had transitioned to adult care while on azathioprine and steroid and antibiotic therapy. For her immunological workup, she was noted to have a normal level of IgG, IgA, and IgM. NOBI was repeatedly found to be normal. She did not have mutations in *IL10RA/B*, *IL10*, or *NEMO*. The patients had a c:109 del C, p: P37QfsX32 mutation in *XIAP* but is female and a heterozygote carrier. As the variants in *TRIM22* are also found in databases it is possible that the *XIAP* variant may contribute to disease in this patient. However, Patient 3 has transferred to adult care and no longer consented to any further immunological testing. Therefore no MDP functional studies were carried out.

## Supplemental Tables

### S1A) Clinical Features

| Patient # | Age of Onset of Symptoms           | Gender | Consanguinity | Clinical Features                                                                                                                | Ethnicity/ History of IBD                                      |
|-----------|------------------------------------|--------|---------------|----------------------------------------------------------------------------------------------------------------------------------|----------------------------------------------------------------|
| 1         | 8 days                             | Female | Yes           | Diarrhea, rectal bleeding, perianal disease, growth failure, weight loss, epithelial granuloma                                   | Lebanese<br>No family history of IBD                           |
| 2         | < 3 months                         | Male   | No            | Severe growth failure, perianal disease, fever, petechiae, hepatomegally, diarrhea, polyarthritis involving mainly large joints. | Jamaican<br>Strong maternal family history of Crohn's Disease  |
| 3         | ~ 6 years and presented at 7 years | Female | No            | Diarrhea, abdominal pains, weight loss, diffuse edema of lower extremities, significant anemia.                                  | Caucasian<br>Strong maternal family history of Crohn's Disease |

### S1B) Genetic Features

| Patient # | SNP         | Exon | Variant Position     |           |              | MAF    | Prediction                  |                    |                   |                   |
|-----------|-------------|------|----------------------|-----------|--------------|--------|-----------------------------|--------------------|-------------------|-------------------|
|           |             |      | Genomic (GrCh37.p13) | cDNA      | Protein      |        | Polyphen2 Rank Score        | SIFT Rank Score    | GERP++ Rank Score | PhyloP Rank Score |
| 1         | rs187416296 | 7    | g.5730705C>T         | c.1324C>T | p.Arg442Cys  | 0.0041 | Probably Damaging (0.87578) | Damaging (0.90636) | 1.68              | 0.36288           |
| 2         | rs61735273  | 2    | g.5719756C>T         | c.731C>T  | p.Ser244Leu  | 0.0035 | Probably Damaging (0.8513)  | Damaging (0.90636) | 0.40419           | 0.77407           |
|           | rs200924168 | 3    | g.5718503G>C         | c.449G>C  | p. Arg150Thr | 0.0044 | Possibly Damaging (0.47786) | Tolerated (0.3317) | 0.01094           | 0.00845           |
| 3         | rs12364019  | 7    | g.5730343G>A         | c.962G>A  | p.Arg321Lys  | 0.015  | Probably Damaging (0.83275) | Damaging (0.70945) | 0.32553           | 0.34637           |

**Table S1. Clinical (A) and Genetic Features (B) of Patients with TRIM22.**

MAF minor allelic frequency based on 1000 Genomes and 6503 healthy individuals genotyped in the NHLBI Exome Sequencing Project (<http://evs.gs.washington.edu>). The variant prediction are based Polyphen2<sup>18</sup>, SIFT (<http://sift.jcvi.org>), GERP++ (<http://mendel.stanford.edu/SidowLab/downloads/gerp/>), and PhyloP (<http://ccg.vital-it.ch/mga/hg19/phylop/phylop.html>).

| Position        | Chromosome | Position  | Identifier   | Reference | Gene Name        | Parent | Parent | Patient |
|-----------------|------------|-----------|--------------|-----------|------------------|--------|--------|---------|
| 1:76226952-SNV  | 1          | 76226952  | ?            | T         | ACADM,<br>DLSTP1 | C_T    | C_T    | C_C     |
| 3:111793206-SNV | 3          | 111793206 | ?            | C         | TMPRSS7          | C_T    | C_T    | T_T     |
| 3:112648127-DeI | 3          | 112648127 | rs4596117; ? | T         | CD200R1          | -_T    | G_T    | G_G     |
| 6:132206095-SNV | 6          | 132206095 | ?            | C         | ENPP1            | A_C    | A_C    | A_A     |
| 7:21698453-SNV  | 7          | 21698453  | ?            | A         | DNAH11           | A_G    | A_G    | G_G     |
| 7:21781702-SNV  | 7          | 21781702  | ?            | A         | DNAH11           | A_G    | A_G    | G_G     |
| 7:91623968-SNV  | 7          | 91623968  | ?            | G         | AKAP9            | A_G    | A_G    | A_A     |
| 10:75442543-SNV | 10         | 75442543  | ?            | C         | AGAP5            | C_T    | C_T    | T_T     |
| 11:5730705-SNV  | 11         | 5730705   | ?            | C         | TRIM22           | C_T    | C_T    | T_T     |
| 11:73796902-SNV | 11         | 73796902  | rs78878933   | T         | C2CD3            | C_T    | C_T    | C_C     |
| 11:78419504-SNV | 11         | 78419504  | ?            | G         | ODZ4             | A_G    | A_G    | A_A     |
| 19:15730499-Ins | 19         | 15730499  | rs55848814   | -         | CYP4F8           | -_C    | -_C    | C_C     |

**Table S2. Autosomal Recessive Variants Identified by WES in Patient 1.**

**Table S3:** VEO Genes

See excel sheet

**Table S4.** VEOIBD Key Drivers

See excel sheet

**Table S5.** IIBDGC GWAS Enrichment in TRIM22 Locus

See excel sheet.

**Table S6.** IIBDGC GWAS Enrichment in TRIM22 eQTL Enrichment

See excel sheet

**Table S7.** eQTL Pathway Enrichment

See excel sheet

**Table S8.** Crohn's GWAS Enriched Blood eQTL Overlap with the VEO Network

**Table S9.** Annotation of 179 VEO Network

See excel sheet

**Table S10.** Functional Categories of Genes in the TRIM22 Sub network

**Table S11.** Inflamed Sigmoid and Rectum Key Drivers

| <b>TRIM22 Levels at Intestine Site</b> | <b>CDAI Correlation</b> | <b>CDAI P Value</b> | <b>Baseline_CRP Correlation</b> | <b>Baseline_CRP P Value</b> | <b>Baseline_Fecal Calprotectin Correlation</b> | <b>Baseline_Fecal Calprotectin P Value</b> | <b># of samples</b> |
|----------------------------------------|-------------------------|---------------------|---------------------------------|-----------------------------|------------------------------------------------|--------------------------------------------|---------------------|
| <b>Ileum</b>                           | -1.23E-01               | 9.34E-02            | 4.41E-02                        | 5.53E-01                    | 4.15E-02                                       | 5.76E-01                                   | 193                 |
| <b>Ascending</b>                       | -5.39E-02               | 5.57E-01            | 1.64E-01                        | 7.52E-02                    | 2.45E-01                                       | 6.93E-03*                                  | 128                 |
| <b>Transverse</b>                      | 1.70E-01                | 5.53E-02            | 1.74E-01                        | 5.30E-02                    | 3.66E-01                                       | 2.26E-05*                                  | 134                 |
| <b>Descending</b>                      | 4.84E-02                | 6.49E-01            | 1.89E-01                        | 7.67E-02                    | 5.50E-01                                       | 1.40E-08*                                  | 96                  |
| <b>Sigmoid</b>                         | -1.52E-01               | 2.05E-01            | 8.79E-02                        | 4.63E-01                    | 4.96E-01                                       | 9.43E-06*                                  | 75                  |
| <b>Rectum</b>                          | -5.02E-02               | 5.09E-01            | 1.85E-01                        | 1.53E-02                    | 3.85E-01                                       | 1.46E-07*                                  | 184                 |
| <b>Total</b>                           | -2.65E-03               | 9.41E-01            | 1.26E-01                        | 5.21E-04*                   | 2.86E-01                                       | 6.54E-16*                                  | 810                 |

**Table S12. Correlations of the Expression of TRIM22 to the Clinical Response Characteristics Stratified by Distinct Intestine Anatomy Sites (Includes Both Inflamed and Non Inflamed Samples).**

| <b>CDAI</b>   | <b>Rho</b>    | <b>P value</b> |
|---------------|---------------|----------------|
| <b>TRIM22</b> | <b>0.0829</b> | <b>0.0203</b>  |

**Table S13. Correlation of the Expression of TRIM22 in blood to CDAI**



**Supplemental Figures**



**Figure S1: Variant Identification Pipeline for WES of Patient 1.**

Whole exome sequencing identified 152,020 exonic variants in Patient 1. Eliminating low-quality and synonymous variants further refined the WES variant set. To isolated potential causative variants, only rare and predicated damaging (by dbNSFP) variants were included in inheritance analysis. Variants identified according to each inheritance model are shown.

**A** TRIM22

1 MDFSVKVDIEKEVTCPICLELLTEPLSLDCGHSFCQACITAKIKESVVISRGESSCPVCQTRFQPGNLRP  
71 NRHLANIVERVKEVKMSPQEGQKRQDVCEHHGKLLQIFCKEDGKVICWVCELSQEHQGHQTFRINEV **VKEC**  
141 **QEKLOVALQR**LIKEDQEA**E**KLEDDIR**QERT**AWKNYIQIERQKILKGFNEMRVILDNEEQ**RELQKLEEGEV**  
211 **NVLDNLA**AATDQLVQQRQDASTLISDL**QRRLRGS**SVEMLDQVIDVMKRSESWTLKKPKSVSKKLSVFRV  
281 PDL SGLQVLKELTDVQYYWVDVMLNPGSATSNAVAISVDQRQVKTRVTRCTFKNSNPCDFSAFGVFGCQYF  
351 SSGKYYWEVDVSGKIAWILGVHSKISSLNKRKSSGFADPSVNYSKVYSRYRPQYGYWVIGLQNTCEYNA  
421 FEDSSSDPKVLTFLMAVPPCRIGVFLDYEAGIVSFFNVTNHGALIKYKFSGCRFSRPAYPYFNPWNCLVP  
491 MTCPPSS

■ Coiled-coil region 1  
■ Coiled-coil region 2  
■ R Arg150  
■ S Ser244



**Figure S2: Heterozygous TRIM22 Variants R150T and S244L Occur in the Coiled-coil Domain and May Affect Domain Oligomerization.**

**A)** Protein sequence for TRIM22 indicating the position of the two coiled-coil regions termed region 1 (green) and region 2 (purple) including the position of R150 and S244.

**B, C)** PrOCoil analysis of coiled coil region 1 (B) and region 2 (C) for TRIM22 with the corresponding variants reveals potential alterations in domain oligomerization patterns. PrOCoil evaluates the relative weighted contribution of each amino acid to the oligomeric character of the coiled-coil domain. The introduction of the R150T and S244L variants alter the weighted effect of positions near the site of variant. These alterations have potential to impact the ability of the coiled-coil domain to fold correctly.



**Figure S3: Blood and Intestine Derived eQTLs:  
Gene Set Enrichment Analysis of Genes Controlled by IBD SNPs (Metacore)**  
See Table S7 for genes in pathway.

Top enriched gene sets among genes controlled by IBD SNPs: NHGRI catalog entries for IBD, UC and CD, plus all WTCCC IBD GWAS SNPs with  $p\text{-value} \leq 0.001$ . 362 genes showed IBD SNP regulation in the blood, 98 in the intestine (56 genes were shared between the two tissues). Log<sub>10</sub> p-value of enrichment on the horizontal axis: intestine (blue bar) and blood (orange bar).

Different Gene Set database categories are reported in each panel: TRIM22 Pathways: See below  
 1. Transcription P53 signaling (TRIM22 is a P53 target gene)  
 4. Immune response: Antiviral actions of interferons  
 9. Ubiquitin Pathway



**Figure S4: Computational Design.**

- A)** Inflamed and non inflamed tissue biopsies were collected from anti TNF $\alpha$  refractory Crohn's patients enrolled in clinical trial for ustekinumab (anti P40- IL12/IL23).
- B)** Bayesian pan intestine network was constructed from microarray expression profiling on biopsies collected from various regions of the intestine.
- C)** Differential expression was performed on inflamed vs. non-inflamed for each region of the intestine collected.
- D)** Differential expression signatures of genes up regulated in inflamed sigmoid and inflamed rectum were projected on Bayesian ileum network for key driver analysis.



**Figure S5: First Neighbors of TRIM22 and NOD2 in VEOIBD Intestine Network.**

Genes within one path of TRIM22 in the VEOIBD RISK network have putative functional roles in autophagy.



**Figure S6: TRIM22 and NOD2 Co-localize in Healthy Controls and Disrupted in Patient Tissue Sections.**

**A, B)** *Immunofluorescence analysis of TRIM22 and NOD2 in colonic biopsy samples from Healthy Controls and Patients.*

TRIM22 (red) and NOD2 (green) localization was analyzed in the villus (A) and crypts (B) of both healthy controls and Patients 1-3. TRIM22 and NOD2 colocalization was observed in the both the villus and crypts of the healthy control biopsy samples. Both TRIM22 and NOD2 expression and colocalization were reduced in the patient biopsy samples. Scale bars represent 10  $\mu$ m.

**C)** *Exogenous TRIM22 co-localize with Exogenous NOD2.*

HEK293T cells seeded on coverslips were co-transfected with FLAG-TRIM22 and HA-NOD2. TRIM22 (red) and NOD2 (green) immunostaining show strong cytoplasmic colocalization. Scale bars represent 10  $\mu$ m.

**D)** *TRIM22 does not co-localize with NOD1.*

To evaluate the specificity of the observed TRIM22 and NOD2 co-localization, immunofluorescence microscopy was performed on HEK293T cells transiently expressing FLAG-TRIM22 and HA-NOD1, a NOD family member that does not interact with TRIM22. TRIM22 (red) and NOD1 (green) staining did not show significant overlap. Scale bars represent 10  $\mu$ m.

**E, F)** *Peptide inhibition of NOD2 in colonic biopsy samples of Healthy Controls and Patients.*

To demonstrate NOD2 antibody specificity, endogenous NOD2 immunostaining was performed on health and disease control biopsy samples as well as Patients 1-3 in the presence or absence of a NOD2 antibody peptide inhibitor. Without peptide incubation, NOD2 showed a cytoplasmic expression in healthy controls and disease controls, and is reduced in the patients. The specific NOD2 peptide is blocking the antigen-antibody binding and therefore no staining is detected when the peptide is added concurrently.



**Figure S7: TRIM22 Variants and shRNA Abrogate NOD2 Signaling.**



**A)** *NOD2 co-immunoprecipitates TRIM22 from in vitro cell lysates after transient co-expression.* HEK293T cells were transfected with HA-epitope tagged NOD2 and either wild type (WT) or mutant (R150T, S244L, R321K, R442C) FLAG-epitope tagged TRIM22 constructs. Twenty-four hours post-transfection, cells were lysed and NOD2 was immunoprecipitated with anti-HA antibody. Western blotting identified bound proteins. WT-TRIM22 interacted with and pulled-down NOD2; however, mutant TRIM22 showed reduced or absent NOD2 binding. NOD1, which does not interact with TRIM22, and an empty vector construct were included as negative controls. All luciferase assay and Western blotting experiments were carried out in triplicate independent experiments and blots are representative.

**B)** *TRIM22 overexpression has no effect on TNF $\alpha$  mRNA levels following stimulation by TNF $\alpha$ .* HCT116 cells were transiently transfected with control (empty vector), TRIM22-WT, or TRIM22-R442C plasmids. Twenty-four hours post-transfection, cells were stimulated for 18 hr with TNF $\alpha$  (20 ng/mL). mRNA of TNF $\alpha$  were assessed by Q-PCR. No significant increase in TNF $\alpha$  mRNA was observed following TNF $\alpha$  stimulation of cells overexpressing TRIM22.

**C, D, E)** *TRIM22 mutants reduce mRNA level of genes downstream of the NOD2 signalling.* HCT116 cells were transiently co-transfected with NOD2 and TRIM22-WT or TRIM22 mutants (R150T, S244L, R321K, R442C). Twenty-four hours post-transfection, cells were stimulated with MDP (10  $\mu$ g/mL) (C) or RSV (0.1  $\mu$ g) (D, E) for 18 hr and then qPCR were performed. Cells transfected with TRIM22 mutants showed significantly reduced expression of TNF $\alpha$  (C), IL-6 (D), and ISG15 (E) (\*p < 0.001 after Bonferroni post-hoc testing).

**F)** *Overexpression of TRIM22 increases ISRE activation.* HEK293T cells were transiently transfected with control (empty vector), TRIM22, or NOD2. ISRE reporter activation was evaluated by luciferase assay following stimulation with respiratory syncytial virus (RSV) (0.1  $\mu$ g). TRIM22 overexpression significantly increased ISRE reporter activation compared to empty vector control (\*p < 0.001 after Bonferroni post-hoc testing). All experiments were carried out in triplicate, independent experiments.



**Figure S8: TRIM22 shRNA Knockdown.**

**A)** To demonstrate the degree of knockdown present in cells expressing TRIM22 shRNA, HEK293T cells were transiently transfected with control (scramble) or various TRIM22 shRNA clones for 48 hours. Western blotting analysis was performed using anti-TRIM22 antibodies with  $\beta$ -actin staining as a loading control.

**B)** Knockdown of TRIM22 reduces mRNA level of genes downstream of the NOD2. mRNA of *TNF $\alpha$* , *IL-6*, and *ISG15* were assessed by qPCR in HT29 cells stably transduced with control (scramble) or TRIM22 shRNA following stimulation by MDP (10  $\mu$ g/mL) or respiratory syncytial virus (RSV) (0.1  $\mu$ g). (\*p < 0.001 after Bonferroni post-hoc testing).



**Figure S9: TRIM22 Variants Abrogates NOD2 Signaling in Patient 2 with Coiled-coil Variants.**

Representative FACS blots and quantification of TNF $\alpha$  production in monocytes following stimulation with NOD2 and TLR4 ligand. Monocytes obtained from Patient 2 did not generate TNF $\alpha$  production in monocytes following stimulation with NOD2 and TLR4 ligand. Monocytes obtained from patient in response to L18-MDP stimulation but demonstrate normal reactivity to LPS. The patient's father and healthy donors are shown as controls. Monocytes are gated for single, live, CD14 $^{+}$ , HLA-DR $^{+}$  cells.  $\Delta$ TNF (%) is determined by subtracting frequency of TNF-positive monocytes in stimulated from unstimulated conditions. Overnight travel of blood sample from Patient 2 and father of Patient 2 caused high baseline TNF without affecting results calculated as  $\Delta$ TNF (%). Grey background indicates normal range. Similar results with patient 2 were obtained in two independent experiments performed ten months apart. Open symbols L18-MDP stimulation, closed symbols LPS stimulation. Similar results were not obtained from Patient 1 and Patient 3 was not tested as she did not consent to further testing.



**Figure S10: TRIM22 Directly Mediates the Polyubiquitination of NOD2 but not MAVS or RIPK2.**

**A) Wildtype TRIM22 enhances polyubiquitination of NOD2 in HEK293 cells.**

HEK293 cells were transiently co-transfected with HA-NOD2, GFP-ubiquitin, and either wildtype (WT) or variant (R150T, S244L, R321L or R442C) FLAG-TRIM22. Following cell lysis, NOD2 was immunoprecipitated using anti-HA antibody bound to Protein G-Sepharose and NOD2 ubiquitination was observed by GFP immunoblotting. Co-transfection with WT-TRIM22 increased NOD2 ubiquitination that was lost in cells transfected with the TRIM22 variants.

**B) TRIM22 does not mediate the ubiquitination of MAVS or RIPK2.**

To determine if TRIM22 also regulates downstream NOD2 signaling modulators, HEK293T cells were co-transfected with FLAG-TRIM22, GFP-ubiquitin, and either HA-MAVS or HA-RIPK2. Twenty-four hours post-transfection, cells were lysed followed by immunoprecipitation of MAVS or RIPK2 using anti-HA-agarose. Immunoblotting for GFP-ubiquitin demonstrated no significant increase compared to empty TRIM22 vector controls. All experiments were carried out in triplicate independent experiments and blots are representative.



**Figure S11: TRIM22 Does Not Mediate K48-linked Polyubiquitination of NOD2.**

**A)** *TRIM22 does not mediate K48-specific polyubiquitination of NOD2.*

HEK293T cells were transiently co-transfected with FLAG-NOD2, HA-(K48-specific) ubiquitin, and either wildtype (WT) or variant (R150T, S244L, R321K, or R442C) V5-TRIM22. Twenty-four hours post-transfection, cells were lysed and NOD2 was immunoprecipitation with anti-FLAG-agarose. Immunoblotting for HA-tagged ubiquitin demonstrated no significant increase in cells transfected with WT-TRIM22 compared to empty vectors controls. Likewise, TRIM22 variants did not show significant K48-ubiquitin staining.

**B, C)** *TRIM22-shRNA does not reduce MDP and RSV induced K48-linked polyubiquitination of NOD2.*

HEK293T cells stably transduced with control (scramble) or TRIM22 shRNA were transfected with a HA-tagged K48-specific ubiquitin construct and FLAG-NOD2. Forty-eight hours post transfection, cell lysates were stimulated with MDP (B) or RSV (C) for the indicated time points followed by cell lysis and immunoprecipitation of NOD2 by anti-FLAG-agarose. In both control

and TRIM22 knockdown cells, stimulation did not result in increased NOD2 K48-specific poly-ubiquitination. Western blotting experiments were carried out in triplicate, independent experiments.

## References

1. Sandborn WJ, Gasink C, Gao LL, et al. Ustekinumab induction and maintenance therapy in refractory Crohn's disease. *The New England journal of medicine* 2012;367:1519-28.
2. Madigan DaY, J. Bayesian graphical models for discrete data. *International Statistical Review* 1995;63:215-232.
3. Schwarz G. Estimating the dimension of a model. *Annals of Statistics* 1978;6:461-464.
4. Zhu J, Lum PY, Lamb J, et al. An integrative genomics approach to the reconstruction of gene networks in segregating populations. *Cytogenet Genome Res* 2004;105:363-74.
5. Schadt EE, Molony C, Chudin E, et al. Mapping the genetic architecture of gene expression in human liver. *PLoS Biol* 2008;6:e107.
6. Zhu J, Wiener MC, Zhang C, et al. Increasing the power to detect causal associations by combining genotypic and expression data in segregating populations. *PLoS Comput Biol* 2007;3:e69.
7. Zhu J, Zhang B, Smith EN, et al. Integrating large-scale functional genomic data to dissect the complexity of yeast regulatory networks. *Nat Genet* 2008;40:854-61.
8. Zhu J, Wiener MC, Zhang C, et al. Increasing the power to detect causal associations by combining genotypic and expression data in segregating populations. *PLoS Comput Biol*. 2007;3:e69. .
9. Zhang B, Horvath S. A general framework for weighted gene co-expression network analysis. *Stat Appl Genet Mol Biol* 2005;4:Article17.
10. Ravasz E, Somera AL, Mongru DA, et al. Hierarchical organization of modularity in metabolic networks. *Science* 2002;297:1551-5.
11. Langfelder P, Zhang B, Horvath S. Defining clusters from a hierarchical cluster tree: the Dynamic Tree Cut library for R. *Bioinformatics* 2007.
12. Zhang B, Gaiteri C, Bodea L-G, et al. Integrated Systems Approach Identifies Genetic Nodes and Networks in Late-Onset Alzheimer's Disease. *Cell* 2013;153:707-720.
13. Tran LM, Zhang B, Zhang Z, et al. Inferring causal genomic alterations in breast cancer using gene expression data. *BMC Syst Biol* 2011;5:121.
14. Wang IM, Zhang B, Yang X, et al. Systems analysis of eleven rodent disease models reveals an inflammatome signature and key drivers. *Mol Syst Biol* 2012;8:594.
15. Yang X, Zhang B, Molony C, et al. Systematic genetic and genomic analysis of cytochrome P450 enzyme activities in human liver. *Genome Res* 2010;20:1020-36.
16. Tusher VG, Tibshirani R, Chu G. Significance analysis of microarrays applied to the ionizing radiation response. *Proc Natl Acad Sci U S A* 2001;98:5116-21.
17. Uhlig HH, Schwerd T, Koletzko S, et al. The Diagnostic Approach to Monogenic Very Early Onset Inflammatory Bowel Disease. *Gastroenterology* 2014.
18. Adzhubei IA, Schmidt S, Peshkin L, et al. A method and server for predicting damaging missense mutations. *Nat Methods* 2010;7:248-9.
